# Supplementary material
Source: publisher site journal article supplement (https://www.spandidos-publications.com/8166/downloadSupplementary)
Supplement: Supplementary file 1 [file downloadSupplementary]

## Sheet: BP_up
Table SIV. GO analysis BP_up
ID	Description	count	listtotal	pophits	poptotal	pvalue	p.adjust	qvalue	geneID	Count
GO:0003157	endocardium development	5	1167	11	16672	0.000538671	0.0448777	0.0411492	ACVR1/NRG1/OVOL2/RBPJ/SMAD4	5
GO:0070932	histone H3 deacetylation	8	1167	21	16672	5.02e-05	0.00780467	0.00715625	HDAC3/HDAC5/HDAC6/HDAC7/HDAC9/PER2/SIRT3/SIRT6	8
GO:0007223	Wnt signaling pathway, calcium modulating pathway	11	1167	39	16672	5.09e-05	0.00780467	0.00715625	AGO1/AGO3/CTNNB1/GNB1/NFATC1/NLK/PLCB1/PPP3CA/ROR2/TCF7L2/TNRC6C	11
GO:0031641	regulation of myelination	8	1167	29	16672	0.000640596	0.0487021	0.0446559	CTNNB1/MTMR2/MTOR/NRG1/RARB/RNF10/TENM4/TNFRSF21	8
GO:0006614	SRP-dependent cotranslational protein targeting to membrane	25	1167	93	16672	3.09e-09	3e-06	2.75e-06	RPL13A/RPL18A/RPL34/RPL35A/RPL37A/RPL39/RPL5/RPL7A/RPL8/RPLP0/RPLP1/RPLP2/RPS11/RPS12/RPS14/RPS16/RPS19/RPS20/RPS21/RPS4X/RPS5/RPS6/RPS8/RPS9/UBA52	25
GO:0006613	cotranslational protein targeting to membrane	26	1167	100	16672	3.26e-09	3e-06	2.75e-06	RPL13A/RPL18A/RPL34/RPL35A/RPL37A/RPL39/RPL5/RPL7A/RPL8/RPLP0/RPLP1/RPLP2/RPS11/RPS12/RPS14/RPS16/RPS19/RPS20/RPS21/RPS4X/RPS5/RPS6/RPS8/RPS9/TRAM2/UBA52	26
GO:0045047	protein targeting to ER	25	1167	99	16672	1.24e-08	8.7e-06	7.98e-06	RPL13A/RPL18A/RPL34/RPL35A/RPL37A/RPL39/RPL5/RPL7A/RPL8/RPLP0/RPLP1/RPLP2/RPS11/RPS12/RPS14/RPS16/RPS19/RPS20/RPS21/RPS4X/RPS5/RPS6/RPS8/RPS9/UBA52	25
GO:0000184	nuclear-transcribed mRNA catabolic process, nonsense-mediated decay	30	1167	120	16672	5.75e-10	9.4e-07	8.62e-07	CASC3/DHX34/ETF1/PABPC1/RPL13A/RPL18A/RPL34/RPL35A/RPL37A/RPL39/RPL5/RPL7A/RPL8/RPLP0/RPLP1/RPLP2/RPS11/RPS12/RPS14/RPS16/RPS19/RPS20/RPS21/RPS4X/RPS5/RPS6/RPS8/RPS9/SECISBP2/UBA52	30
GO:0072599	establishment of protein localization to endoplasmic reticulum	25	1167	103	16672	2.94e-08	1.8e-05	1.65e-05	RPL13A/RPL18A/RPL34/RPL35A/RPL37A/RPL39/RPL5/RPL7A/RPL8/RPLP0/RPLP1/RPLP2/RPS11/RPS12/RPS14/RPS16/RPS19/RPS20/RPS21/RPS4X/RPS5/RPS6/RPS8/RPS9/UBA52	25
GO:0006611	protein export from nucleus	13	1167	58	16672	0.000147519	0.0176375	0.0161721	CALR/CCHCR1/DUSP16/GSK3B/NUP214/RANBP17/RANBP3/RANGAP1/TCF7L2/TPR/XPO1/XPO5/XPO6	13
GO:0090307	mitotic spindle assembly	11	1167	50	16672	0.000557924	0.0455824	0.0417953	ARHGEF10/AURKB/FLNA/KIFC1/KPNB1/NEK2/PLK1/TPR/TPX2/TUBGCP3/TUBGCP5	11
GO:1902850	microtubule cytoskeleton organization involved in mitosis	11	1167	51	16672	0.000667016	0.0495411	0.0454252	ARHGEF10/AURKB/FLNA/KIFC1/KPNB1/NEK2/PLK1/TPR/TPX2/TUBGCP3/TUBGCP5	11
GO:0000956	nuclear-transcribed mRNA catabolic process	42	1167	196	16672	4.82e-11	1.18e-07	1.08e-07	AGO1/CASC3/CNOT10/DHX34/DIS3L2/EIF4A1/EIF4B/ETF1/EXOSC4/MLH1/MTPAP/NT5C3B/PABPC1/PATL2/RPL13A/RPL18A/RPL34/RPL35A/RPL37A/RPL39/RPL5/RPL7A/RPL8/RPLP0/RPLP1/RPLP2/RPS11/RPS12/RPS14/RPS16/RPS19/RPS20/RPS21/RPS4X/RPS5/RPS6/RPS8/RPS9/SAMD4A/SECISBP2/TNRC6C/UBA52	42
GO:0070972	protein localization to endoplasmic reticulum	26	1167	123	16672	3.06e-07	0.000107222	9.83e-05	GRIK5/RPL13A/RPL18A/RPL34/RPL35A/RPL37A/RPL39/RPL5/RPL7A/RPL8/RPLP0/RPLP1/RPLP2/RPS11/RPS12/RPS14/RPS16/RPS19/RPS20/RPS21/RPS4X/RPS5/RPS6/RPS8/RPS9/UBA52	26
GO:0006402	mRNA catabolic process	44	1167	211	16672	4.34e-11	1.18e-07	1.08e-07	AGO1/AGO3/CASC3/CNOT10/DHX34/DIS3L2/EIF4A1/EIF4B/ETF1/EXOSC4/MLH1/MTPAP/NT5C3B/PABPC1/PATL2/RPL13A/RPL18A/RPL34/RPL35A/RPL37A/RPL39/RPL5/RPL7A/RPL8/RPLP0/RPLP1/RPLP2/RPS11/RPS12/RPS14/RPS16/RPS19/RPS20/RPS21/RPS4X/RPS5/RPS6/RPS8/RPS9/SAMD4A/SECISBP2/TNRC6C/UBA52/ZC3HAV1	44
GO:0019083	viral transcription	34	1167	178	16672	6.93e-08	3.4e-05	3.12e-05	AAAS/NELFA/NUP155/NUP188/NUP214/NUP93/POM121/RPL13A/RPL18A/RPL34/RPL35A/RPL37A/RPL39/RPL5/RPL7A/RPL8/RPLP0/RPLP1/RPLP2/RPS11/RPS12/RPS14/RPS16/RPS19/RPS20/RPS21/RPS4X/RPS5/RPS6/RPS8/RPS9/SUPT5H/TPR/UBA52	34
GO:0006413	translational initiation	36	1167	192	16672	4.73e-08	2.57e-05	2.36e-05	EIF2S3/EIF3F/EIF4A1/EIF4B/EIF4EBP1/EIF4EBP2/EIF4G3/METTL3/PABPC1/RPL13A/RPL18A/RPL34/RPL35A/RPL37A/RPL39/RPL5/RPL7A/RPL8/RPLP0/RPLP1/RPLP2/RPS11/RPS12/RPS14/RPS16/RPS19/RPS20/RPS21/RPS4X/RPS5/RPS6/RPS8/RPS9/TPR/UBA52/YTHDF1	36
GO:0019080	viral gene expression	35	1167	189	16672	9.97e-08	4.44e-05	4.08e-05	AAAS/EIF3F/NELFA/NUP155/NUP188/NUP214/NUP93/POM121/RPL13A/RPL18A/RPL34/RPL35A/RPL37A/RPL39/RPL5/RPL7A/RPL8/RPLP0/RPLP1/RPLP2/RPS11/RPS12/RPS14/RPS16/RPS19/RPS20/RPS21/RPS4X/RPS5/RPS6/RPS8/RPS9/SUPT5H/TPR/UBA52	35
GO:0006612	protein targeting to membrane	34	1167	185	16672	1.83e-07	7.47e-05	6.85e-05	ANXA2/ERBB2/ICMT/MYO1C/NFASC/NUP155/PIP5K1A/PRKCI/RPL13A/RPL18A/RPL34/RPL35A/RPL37A/RPL39/RPL5/RPL7A/RPL8/RPLP0/RPLP1/RPLP2/RPS11/RPS12/RPS14/RPS16/RPS19/RPS20/RPS21/RPS4X/RPS5/RPS6/RPS8/RPS9/TRAM2/UBA52	34
GO:0051225	spindle assembly	15	1167	82	16672	0.000507622	0.0436555	0.0400286	ARHGEF10/AURKB/FLNA/HDAC3/KIFC1/KPNB1/MLH1/NEK2/NEK6/PLK1/STARD9/TPR/TPX2/TUBGCP3/TUBGCP5	15
GO:0006401	RNA catabolic process	44	1167	241	16672	3.67e-09	3e-06	2.75e-06	AGO1/AGO3/CASC3/CNOT10/DHX34/DIS3L2/EIF4A1/EIF4B/ETF1/EXOSC4/MLH1/MTPAP/NT5C3B/PABPC1/PATL2/RPL13A/RPL18A/RPL34/RPL35A/RPL37A/RPL39/RPL5/RPL7A/RPL8/RPLP0/RPLP1/RPLP2/RPS11/RPS12/RPS14/RPS16/RPS19/RPS20/RPS21/RPS4X/RPS5/RPS6/RPS8/RPS9/SAMD4A/SECISBP2/TNRC6C/UBA52/ZC3HAV1	44
GO:0003279	cardiac septum development	17	1167	96	16672	0.000329763	0.0329897	0.0302489	ACVR1/ADAMTS6/BMPR2/DHRS3/FGFR2/MAML1/NPRL3/PARVA/PLXND1/PTK7/RARB/SAV1/SMAD4/SMAD7/SUFU/TGFBR1/TGFBR3	17
GO:0016925	protein sumoylation	23	1167	130	16672	3.23e-05	0.00527738	0.00483893	AAAS/AURKB/CTNNB1/EYA1/GNL3/HDAC7/INCENP/NFATC2IP/NOP58/NUP155/NUP188/NUP214/NUP93/POM121/RANGAP1/SAE1/SCMH1/SENP5/TP53BP1/TPR/TRIM28/TRPM4/UBA2	23
GO:0042472	inner ear morphogenesis	16	1167	92	16672	0.000601068	0.0467688	0.0428832	ABR/ATP8A2/CELSR1/EPHB2/EYA1/FGFR1/FGFR2/LRIG1/NR4A3/PDZD7/PRRX1/PTK7/ROR2/SCRIB/SOBP/WDPCP	16
GO:0044033	multi-organism metabolic process	37	1167	213	16672	2.37e-07	8.94e-05	8.19e-05	AAAS/EIF3F/NELFA/NUP155/NUP188/NUP214/NUP93/PI4KA/POM121/RPL13A/RPL18A/RPL34/RPL35A/RPL37A/RPL39/RPL5/RPL7A/RPL8/RPLP0/RPLP1/RPLP2/RPS11/RPS12/RPS14/RPS16/RPS19/RPS20/RPS21/RPS4X/RPS5/RPS6/RPS8/RPS9/SUPT5H/TPR/TRIM28/UBA52	37
GO:0010770	positive regulation of cell morphogenesis involved in differentiation	21	1167	121	16672	9.35e-05	0.0127302	0.0116726	ANKRD27/BMPR2/CALR/CRKL/CUX2/DOCK1/DOCK5/EEF2K/FLNA/FN1/GSK3B/LIMK1/LRP8/NRG1/NTRK3/PLXNB2/PLXNB3/ROBO1/ROBO2/SLIT2/ZFYVE27	21
GO:0007051	spindle organization	17	1167	100	16672	0.000540144	0.0448777	0.0411492	ARHGEF10/AURKB/CEP72/FLNA/HDAC3/KIFC1/KPNB1/MLH1/NEK2/NEK6/PLK1/RANBP1/STARD9/TPR/TPX2/TUBGCP3/TUBGCP5	17
GO:0010827	regulation of glucose transport	17	1167	102	16672	0.000682912	0.0499647	0.0458136	AAAS/CAPN10/GRB10/INSR/NR4A3/NUP155/NUP188/NUP214/NUP93/PEA15/PIK3R3/POM121/PRKCB/PRKCI/PRKCZ/SIRT6/TPR	17
GO:0008360	regulation of cell shape	23	1167	140	16672	0.000106063	0.0136822	0.0125454	ARAP1/ATP10A/BVES/COCH/CYFIP1/DIAPH1/FGD1/FGD6/FN1/ICAM1/ITGB2/LPAR1/MYH9/MYO10/PARVA/PDPN/PLXNB2/PLXNB3/PTK2/PTK2B/SHROOM3/WDPCP/WIPF1	23
GO:0038127	ERBB signaling pathway	23	1167	146	16672	0.000202284	0.0215565	0.0197655	AP2S1/APP/ARAP1/CBLC/EFEMP1/ERBB2/ERBB3/HGS/KRAS/LGMN/MMP9/MVB12B/MVP/NRG1/PTK2/PTK2B/PTPN12/RASSF2/RBPJ/RNF126/SHC3/SHKBP1/UBA52	23
GO:0001764	neuron migration	21	1167	134	16672	0.000403788	0.0388112	0.0355867	APBB2/AXL/BAX/CELSR1/COL3A1/CTNNB1/ELP3/FGFR1/MARK1/MARK2/MDGA1/MEF2C/NAV1/NRG1/NTRK3/PLXNB2/PRKG1/PTK2/SATB2/UNC5D/UNK	21
GO:0032886	regulation of microtubule-based process	21	1167	135	16672	0.000447304	0.042167	0.0386637	ARHGEF2/BBS2/CCDC40/CCNF/CDKN1B/CEP250/CNIH2/CTNNB1/DIAPH1/EML2/ERBB2/GSK3B/HDAC6/NEK2/PHLDB2/PLK1/RANBP1/TBCD/TMEM67/TPR/XPO1	21
GO:0031032	actomyosin structure organization	24	1167	155	16672	0.000194701	0.0214218	0.0196421	ACTN2/ARAP1/ARHGEF10/CNN2/EPB41L1/FHOD3/KRT19/KRT8/LIMK1/LPAR1/MEF2C/MTOR/MYH3/MYH9/MYPN/NOX4/PHACTR1/PHLDB2/PTK2B/SLC9A1/SMAD4/TGFBR1/TMOD3/WDR1	24
GO:0048639	positive regulation of developmental growth	23	1167	155	16672	0.000490007	0.0433299	0.03973	AGRN/ATP8A2/BBS2/BMPR2/CELF1/FGFR1/FGFR2/FN1/GSK3B/INSR/LIMK1/MEF2C/MTOR/NRG1/NTRK3/PLCB1/PRKDC/RBPJ/SOX15/STAT5B/TGFBR3/ZFYVE27/ZP3	23
GO:0006417	regulation of translation	49	1167	335	16672	6.93e-07	0.000209653	0.000192235	AARS/AGO1/AGO3/APP/CALR/CASC3/CELF1/CIRBP/CNOT10/EEF2/EEFSEC/EIF3F/EIF4A1/EIF4B/EIF4EBP1/EIF4EBP2/EIF4G3/ENC1/ERBB2/ETF1/GAPDH/IGF2BP3/ILF3/KRT17/MAPKAPK5/METTL3/MTOR/PABPC1/PATL2/PER2/PRR16/PTK2B/PUM1/RBMS3/RPL13A/RPS14/RPS4X/RPS5/RPS6KA1/RPS9/SAMD4A/SECISBP2/SESN2/THBS1/TNRC6C/TPR/UNK/XPO5/YTHDF1	49
GO:0010631	epithelial cell migration	32	1167	222	16672	7.63e-05	0.0106896	0.00980153	ADAM9/AMOTL1/BMPR2/DOCK1/DOCK5/EPHA2/EPHB4/FGFR1/HDAC5/HDAC6/HDAC7/HDAC9/ITGB2/KRT16/MCC/MMP9/MYH9/NUP188/NUP93/PLXND1/PTK2/PTK2B/PTPRG/PTPRM/ROBO1/S100A2/SLIT2/SPARC/TGFBR1/THBS1/VEGFC/WDPCP	32
GO:0090130	tissue migration	33	1167	231	16672	7.1e-05	0.0102336	0.00938337	ACTG2/ADAM9/AMOTL1/BMPR2/DOCK1/DOCK5/EPHA2/EPHB4/FGFR1/HDAC5/HDAC6/HDAC7/HDAC9/ITGB2/KRT16/MCC/MMP9/MYH9/NUP188/NUP93/PLXND1/PTK2/PTK2B/PTPRG/PTPRM/ROBO1/S100A2/SLIT2/SPARC/TGFBR1/THBS1/VEGFC/WDPCP	33
GO:0034655	nucleobase-containing compound catabolic process	52	1167	365	16672	7.27e-07	0.000209653	0.000192235	AGO1/AGO3/AHCY/BAX/CASC3/CNOT10/CNP/DHX34/DIS3L2/DNPH1/EIF4A1/EIF4B/ETF1/EXOSC4/KPNB1/MLH1/MTPAP/NT5C3B/PABPC1/PATL2/PDE3A/PDE4D/PDE8A/RPL13A/RPL18A/RPL34/RPL35A/RPL37A/RPL39/RPL5/RPL7A/RPL8/RPLP0/RPLP1/RPLP2/RPS11/RPS12/RPS14/RPS16/RPS19/RPS20/RPS21/RPS4X/RPS5/RPS6/RPS8/RPS9/SAMD4A/SECISBP2/TNRC6C/UBA52/ZC3HAV1	52
GO:0090132	epithelium migration	32	1167	225	16672	9.89e-05	0.0131019	0.0120134	ADAM9/AMOTL1/BMPR2/DOCK1/DOCK5/EPHA2/EPHB4/FGFR1/HDAC5/HDAC6/HDAC7/HDAC9/ITGB2/KRT16/MCC/MMP9/MYH9/NUP188/NUP93/PLXND1/PTK2/PTK2B/PTPRG/PTPRM/ROBO1/S100A2/SLIT2/SPARC/TGFBR1/THBS1/VEGFC/WDPCP	32
GO:0034329	cell junction assembly	27	1167	192	16672	0.000402146	0.0388112	0.0355867	ACTB/ACTN2/CTNNB1/FLNA/FN1/HDAC7/ITGB4/KRT5/LSR/MYO1C/NFASC/NPHP4/PHLDB2/PIP5K1A/PIP5K1C/PRKCI/PTK2/PTK2B/PTPRK/RAPGEF1/SLC9A1/SMAD7/TBCD/THBS1/TRIP6/WDPCP/WDR1	27
GO:0007265	Ras protein signal transduction	43	1167	307	16672	1.01e-05	0.00205872	0.00188768	ABR/ARFGEF3/ARHGEF10/ARHGEF10L/ARHGEF2/CELSR1/COL1A2/COL3A1/CRKL/CYFIP1/DNMBP/DNMT1/FARP2/FGD1/FGD6/GNB1/HACE1/KPNB1/KRAS/LIMK1/LPAR1/MAPKAPK5/MYO9B/NCKAP1/NISCH/NRG1/PREX2/RALB/RAPGEF1/RASAL2/RASGRF2/RFXANK/RHOG/ROBO1/RTKN/SETDB1/SHC2/SHC3/SPATA13/STAMBP/TIAM2/TRIM28/TRIO	43
GO:0044270	cellular nitrogen compound catabolic process	56	1167	403	16672	6.23e-07	0.000203482	0.000186577	AFMID/AGO1/AGO3/AHCY/BAX/BLVRB/CASC3/CNOT10/CNP/DHX34/DIS3L2/DNPH1/EIF4A1/EIF4B/ETF1/EXOSC4/KPNB1/MLH1/MTPAP/NT5C3B/PABPC1/PATL2/PDE3A/PDE4D/PDE8A/POR/RPL13A/RPL18A/RPL34/RPL35A/RPL37A/RPL39/RPL5/RPL7A/RPL8/RPLP0/RPLP1/RPLP2/RPS11/RPS12/RPS14/RPS16/RPS19/RPS20/RPS21/RPS4X/RPS5/RPS6/RPS8/RPS9/SAMD4A/SECISBP2/TET1/TNRC6C/UBA52/ZC3HAV1	56
GO:0046700	heterocycle catabolic process	55	1167	396	16672	7.96e-07	0.00021684	0.000198825	AFMID/AGO1/AGO3/AHCY/BAX/BLVRB/CASC3/CNOT10/CNP/DHX34/DIS3L2/DNPH1/EIF4A1/EIF4B/ETF1/EXOSC4/KPNB1/MLH1/MTPAP/NT5C3B/PABPC1/PATL2/PDE3A/PDE4D/PDE8A/RPL13A/RPL18A/RPL34/RPL35A/RPL37A/RPL39/RPL5/RPL7A/RPL8/RPLP0/RPLP1/RPLP2/RPS11/RPS12/RPS14/RPS16/RPS19/RPS20/RPS21/RPS4X/RPS5/RPS6/RPS8/RPS9/SAMD4A/SECISBP2/TET1/TNRC6C/UBA52/ZC3HAV1	55
GO:0034248	regulation of cellular amide metabolic process	50	1167	366	16672	4.04e-06	0.000900632	0.000825807	AARS/AGO1/AGO3/APP/CALR/CASC3/CELF1/CIRBP/CNOT10/EEF2/EEFSEC/EIF3F/EIF4A1/EIF4B/EIF4EBP1/EIF4EBP2/EIF4G3/ENC1/ERBB2/ETF1/GAPDH/IGF2BP3/ILF3/KRT17/MAPKAPK5/METTL3/MTOR/PABPC1/PATL2/PER2/PRR16/PTK2B/PUM1/RBMS3/RPL13A/RPS14/RPS4X/RPS5/RPS6KA1/RPS9/SAMD4A/SAMD8/SECISBP2/SESN2/THBS1/TNRC6C/TPR/UNK/XPO5/YTHDF1	50
GO:0045927	positive regulation of growth	32	1167	236	16672	0.000242118	0.0252524	0.0231544	AGRN/ATP8A2/BBS2/BMPR2/CELF1/DNPH1/ERBB2/EXOSC4/EXTL3/FGFR1/FGFR2/FN1/GSK3B/INSR/KRT17/LIMK1/MEF2C/MTOR/NRG1/NTRK3/PLCB1/PRKDC/PTK2B/RBPJ/RPS6KA1/SLC9A1/SOX15/STAT5B/TGFBR1/TGFBR3/ZFYVE27/ZP3	32
GO:0019439	aromatic compound catabolic process	55	1167	406	16672	1.75e-06	0.000452022	0.000414467	AFMID/AGO1/AGO3/AHCY/BAX/BLVRB/CASC3/CNOT10/CNP/DHX34/DIS3L2/DNPH1/EIF4A1/EIF4B/ETF1/EXOSC4/KPNB1/MAOA/MLH1/MTPAP/NT5C3B/PABPC1/PATL2/PDE3A/PDE4D/PDE8A/RPL13A/RPL18A/RPL34/RPL35A/RPL37A/RPL39/RPL5/RPL7A/RPL8/RPLP0/RPLP1/RPLP2/RPS11/RPS12/RPS14/RPS16/RPS19/RPS20/RPS21/RPS4X/RPS5/RPS6/RPS8/RPS9/SAMD4A/SECISBP2/TNRC6C/UBA52/ZC3HAV1	55
GO:1901361	organic cyclic compound catabolic process	57	1167	429	16672	2.12e-06	0.000519312	0.000476167	AFMID/AGO1/AGO3/AHCY/BAX/BLVRB/CASC3/CNOT10/CNP/DHX34/DIS3L2/DNPH1/EIF4A1/EIF4B/ETF1/EXOSC4/KPNB1/MAOA/MLH1/MTPAP/NT5C3B/PABPC1/PATL2/PDE3A/PDE4D/PDE8A/RPL13A/RPL18A/RPL34/RPL35A/RPL37A/RPL39/RPL5/RPL7A/RPL8/RPLP0/RPLP1/RPLP2/RPS11/RPS12/RPS14/RPS16/RPS19/RPS20/RPS21/RPS4X/RPS5/RPS6/RPS8/RPS9/SAMD4A/SCARF1/SECISBP2/TET1/TNRC6C/UBA52/ZC3HAV1	57
GO:0090150	establishment of protein localization to membrane	47	1167	354	16672	1.67e-05	0.00326818	0.00299666	ACTN2/ANXA2/BAX/BBS1/BBS2/DPP10/EFR3A/EPHA2/ERBB2/ICMT/MYO1C/NFASC/NUP155/PIP5K1A/PKDCC/PPP3CC/PRKCI/RHOG/RPL13A/RPL18A/RPL34/RPL35A/RPL37A/RPL39/RPL5/RPL7A/RPL8/RPLP0/RPLP1/RPLP2/RPS11/RPS12/RPS14/RPS16/RPS19/RPS20/RPS21/RPS4X/RPS5/RPS6/RPS8/RPS9/TRAM2/TSPAN15/TTC7A/TTC7B/UBA52	47
GO:0006364	rRNA processing	34	1167	260	16672	0.000313921	0.0320592	0.0293957	BOP1/DIS3L2/ERI3/EXOSC4/MPHOSPH10/NOP58/PELP1/RPL13A/RPL18A/RPL34/RPL35A/RPL37A/RPL39/RPL5/RPL7A/RPL8/RPLP0/RPLP1/RPLP2/RPS11/RPS12/RPS14/RPS16/RPS19/RPS20/RPS21/RPS4X/RPS5/RPS6/RPS8/RPS9/RRP1B/UBA52/WDR37	34
GO:0051056	regulation of small GTPase mediated signal transduction	37	1167	283	16672	0.000175175	0.01997	0.0183109	ABR/ARAP1/ARFGEF3/ARHGAP11B/ARHGAP40/ARHGEF10/ARHGEF10L/ARHGEF2/COL3A1/DEPDC1B/DNMBP/FARP2/FGD1/FGD6/INPP5B/KRAS/LPAR1/MYO9A/MYO9B/NRG1/OPHN1/PREX2/RALGAPA1/RALGAPA2/RAPGEF1/RASAL2/RASGRF2/RHOG/ROBO1/SIPA1L1/SLIT2/SPATA13/SRGAP1/STAMBP/TIAM2/TRIO/TSC2	37
GO:0071417	cellular response to organonitrogen compound	60	1167	462	16672	2.43e-06	0.000567561	0.000520407	ACTN2/APP/ARHGEF2/ATP6V0B/CAPN10/CIB2/COL1A1/COL1A2/COL3A1/COL6A1/CTNNB1/DIAPH1/DNMT1/DNMT3A/EEF2K/EIF4EBP1/EIF4EBP2/FBN1/GABRB3/GNB1/GRB10/HDAC5/HDAC9/ICAM1/INSR/MEF2C/MYO1C/MYO5A/NOD1/NOX4/NR4A3/PDE3A/PDE4D/PIK3CG/PIK3R3/POR/PRKAR1B/PRKAR2A/PRKCB/PRKCI/PRKCZ/PRKDC/PTK2/RAD51/RANGAP1/RAPGEF1/RPLP0/RPTOR/SESN2/SLC8A3/SLC9A1/SLIT2/SMARCC1/SOCS7/SPIDR/STAT5B/TBC1D4/TRPV1/TSC2/UCP2	60
GO:0010769	regulation of cell morphogenesis involved in differentiation	33	1167	256	16672	0.000494997	0.0433299	0.03973	ANKRD27/BMPR2/CACNA1A/CALR/CRKL/CUX2/DOCK1/DOCK5/EEF2K/EPHB2/FBLN1/FLNA/FN1/GSK3B/LIMK1/LRP8/MARK2/NRG1/NTRK3/PLXNA1/PLXNB2/PLXNB3/PLXND1/PPP3CA/PTK2/ROBO1/ROBO2/SIPA1L1/SLIT2/SLIT3/SSH2/UST/ZFYVE27	33
GO:0016072	rRNA metabolic process	34	1167	266	16672	0.00047895	0.0433299	0.03973	BOP1/DIS3L2/ERI3/EXOSC4/MPHOSPH10/NOP58/PELP1/RPL13A/RPL18A/RPL34/RPL35A/RPL37A/RPL39/RPL5/RPL7A/RPL8/RPLP0/RPLP1/RPLP2/RPS11/RPS12/RPS14/RPS16/RPS19/RPS20/RPS21/RPS4X/RPS5/RPS6/RPS8/RPS9/RRP1B/UBA52/WDR37	34
GO:0000226	microtubule cytoskeleton organization	52	1167	407	16672	1.79e-05	0.00336812	0.0030883	ARHGEF10/ARHGEF2/AURKB/AXIN1/BBS2/BICD2/BRCA2/CCDC40/CCNF/CDKN1B/CEP250/CEP72/CNP/CNTROB/CTNNB1/DNAAF5/DNAI2/EML1/EML2/EYA1/FLNA/GAPDH/HDAC3/HDAC6/HTT/IFT172/KIFC1/KPNB1/MARK1/MARK2/MLH1/MYH9/NAV1/NEK2/NEK6/NINL/PHLDB2/PLK1/PPP1R12A/PRKCZ/PTK2/RANBP1/SS18/STARD9/TBCD/TMEM67/TPR/TPX2/TTLL1/TUBGCP3/TUBGCP5/XPO1	52
GO:0022604	regulation of cell morphogenesis	58	1167	460	16672	8.92e-06	0.00190099	0.00174305	ANKRD27/ARAP1/ATP10A/BMPR2/BVES/CACNA1A/CALR/COCH/CRKL/CUX2/CYFIP1/DIAPH1/DOCK1/DOCK5/EEF2K/EPHB2/FBLN1/FGD1/FGD6/FLNA/FMNL2/FN1/GSK3B/HTT/ICAM1/ITGB2/LARP4/LIMK1/LPAR1/LRP8/MARK2/MYH9/MYO10/NRG1/NTRK3/PARVA/PDPN/PLXNA1/PLXNB2/PLXNB3/PLXND1/PPP3CA/PTK2/PTK2B/QRICH1/ROBO1/ROBO2/SHROOM3/SIPA1L1/SLIT2/SLIT3/SPARC/SSH2/UST/WDPCP/WIPF1/ZFYVE27/ZMYM4	58
GO:0019058	viral life cycle	55	1167	444	16672	2.51e-05	0.00439663	0.00403136	AAAS/AXL/DDB1/DDX5/EIF3F/ICAM1/ILF3/KPNB1/LDLR/LGALS1/MVB12B/NELFA/NUP155/NUP188/NUP214/NUP93/PABPC1/PC/PI4KA/POM121/PPIH/RPL13A/RPL18A/RPL34/RPL35A/RPL37A/RPL39/RPL5/RPL7A/RPL8/RPLP0/RPLP1/RPLP2/RPS11/RPS12/RPS14/RPS16/RPS19/RPS20/RPS21/RPS4X/RPS5/RPS6/RPS8/RPS9/SLC1A5/SLC20A2/SUPT5H/TPR/TRIM28/TRIM5/UBA52/WWP2/XPO1/ZC3HAV1	55
GO:0031589	cell-substrate adhesion	37	1167	301	16672	0.000589309	0.0465934	0.0427224	ACTN2/ADAM9/AXL/BVES/CALR/CD44/COL1A1/COL26A1/COL3A1/COL8A1/CRKL/CTNNB1/DOCK1/DOCK5/FBLN1/FLNA/FN1/GSK3B/ITGB2/ITGB4/LGALS1/MYO1G/NID1/PARVA/PHLDB2/PIP5K1A/PRKCZ/PTK2/PTK2B/PTPRK/SLC9A1/TBCD/THBS1/TRIP6/VEGFC/VWF/WDPCP	37
GO:0007507	heart development	60	1167	493	16672	1.86e-05	0.00338416	0.003103	ACTN2/ACVR1/ADAM19/ADAMTS6/ARID1A/BAZ1B/BMPR2/BVES/CACNA1C/CALR/CCDC40/COL3A1/CRKL/CTNNB1/DHRS3/DYNC2H1/ECE1/EPHB4/ERBB2/ERBB3/EYA1/FBN1/FGFR1/FGFR2/FHOD3/HDAC9/IFT172/INSR/MAML1/MEF2C/MEF2D/MTOR/NCOA6/NOX4/NPRL3/NRG1/NTRK3/OVOL2/PARVA/PLXND1/PRKDC/PTK2/PTK7/RARB/RBPJ/ROBO1/SAV1/SH3PXD2B/SIRT6/SLC9A1/SMAD4/SMAD7/SPARC/SUFU/TCF25/TENM4/TGFBR1/TGFBR3/TSC2/ZMIZ1	60
GO:0072657	protein localization to membrane	58	1167	478	16672	2.79e-05	0.00472149	0.00432922	ACTN2/AGRN/ANXA2/BAX/BBS1/BBS2/CACNA1A/DPP10/EFR3A/EPHA2/ERBB2/FLNA/GRIK5/HGS/ICMT/ITGB2/MYO1C/MYO5A/NFASC/NUP155/PIP5K1A/PKDCC/PPP3CC/PRKCI/PRKCZ/RHOG/RPL13A/RPL18A/RPL34/RPL35A/RPL37A/RPL39/RPL5/RPL7A/RPL8/RPLP0/RPLP1/RPLP2/RPS11/RPS12/RPS14/RPS16/RPS19/RPS20/RPS21/RPS4X/RPS5/RPS6/RPS8/RPS9/SH3PXD2B/TRAM2/TSPAN15/TTC7A/TTC7B/TULP2/UBA52/ZFYVE27	58
GO:0018205	peptidyl-lysine modification	48	1167	397	16672	0.000145986	0.0176375	0.0161721	AAAS/ARID4B/AURKB/BRCA2/CTNNB1/DNMT1/DOHH/ELP3/EYA1/GNL3/HCFC1/HDAC6/HDAC7/HDAC9/HIST1H1C/INCENP/JADE1/KAT6A/KMT2C/NFATC2IP/NOP58/NUP155/NUP188/NUP214/NUP93/POM121/POR/PRDM5/RANGAP1/RUVBL1/RUVBL2/SAE1/SAP130/SCMH1/SENP5/SETDB1/SIRT3/SMAD4/SMYD3/SPI1/TP53BP1/TPR/TRIM28/TRPM4/UBA2/USP22/YEATS2/ZNF274	48
GO:0010608	posttranscriptional regulation of gene expression	55	1167	459	16672	6.3e-05	0.00936273	0.00858486	AARS/AGO1/AGO3/APP/CALR/CARHSP1/CASC3/CELF1/CIRBP/CNOT10/EEF2/EEFSEC/EIF3F/EIF4A1/EIF4B/EIF4EBP1/EIF4EBP2/EIF4G3/ENC1/ERBB2/ETF1/EXOSC4/GAPDH/IGF2BP3/ILF3/KRT17/MAPKAPK5/METTL3/MTOR/NUP214/PABPC1/PATL2/PER2/PRR16/PSMB5/PTK2B/PUM1/RBMS3/RPL13A/RPS14/RPS4X/RPS5/RPS6KA1/RPS9/SAMD4A/SECISBP2/SESN2/THBS1/TNRC6C/TPR/UBA52/UNK/XPO1/XPO5/YTHDF1	55
GO:0034470	ncRNA processing	48	1167	402	16672	0.000196651	0.0214218	0.0196421	AARS/ADAT1/AGO1/AGO3/BOP1/DIS3L2/ELP3/ERI3/EXOSC4/INTS3/INTS4/INTS6/INTS9/METTL3/MPHOSPH10/NOP58/PELP1/RPL13A/RPL18A/RPL34/RPL35A/RPL37A/RPL39/RPL5/RPL7A/RPL8/RPLP0/RPLP1/RPLP2/RPS11/RPS12/RPS14/RPS16/RPS19/RPS20/RPS21/RPS4X/RPS5/RPS6/RPS8/RPS9/RRP1B/TRMT2B/TRUB2/TSEN2/UBA52/WDR37/WDR4	48
GO:0042692	muscle cell differentiation	41	1167	344	16672	0.000578772	0.0465105	0.0426463	ACTN2/ACVR1/ARID1A/ATP2A2/AXIN1/BVES/CALR/CTNNB1/FGFR2/FHOD3/GSK3B/HDAC5/HDAC9/IL4R/KCNH1/KRAS/KRT19/KRT8/LGALS1/MAML1/MEF2C/MKL2/MTOR/MYH3/MYH9/MYPN/NOX4/NR2C2/NRG1/PLCB1/PPP3CA/RARB/RBPJ/RBPMS2/SLC9A1/SMAD4/SMYD3/SOX15/TCF7L2/TMOD3/WDR1	41
GO:0044772	mitotic cell cycle phase transition	53	1167	450	16672	0.000133041	0.0167222	0.0153329	ACVR1/APP/BACH1/BAX/BRD4/BUB1/BUB1B/CCNY/CDC27/CDK14/CDK3/CDKN1B/CEP250/CEP72/CNOT10/CRLF3/CUL4A/DBF4B/DDB1/EIF4EBP1/ERCC2/JADE1/KANK2/KNTC1/LATS2/MCM5/MCM7/MELK/NEK2/NEK6/NINL/ORC1/ORC2/PDPN/PLAGL1/PLCB1/PLK1/POLA2/POLE/PPP1R12A/PPP3CA/PRKDC/RANBP1/RFWD3/RPS6/SFI1/TMOD3/TOPBP1/TPR/TPRA1/TPX2/TUBA1A/UBA52	53
GO:0043434	response to peptide hormone	45	1167	390	16672	0.000645785	0.0487021	0.0446559	ACTN2/ATP2A2/ATP6V0B/CAPN10/CDKN1B/COL1A1/EEF2K/EIF4EBP1/EIF4EBP2/FBN1/GNB1/GRB10/HDAC5/HDAC9/INPPL1/INSR/LRP5/MTOR/MYO1C/MYO5A/NR4A3/PIK3R3/POR/PRKAR1B/PRKAR2A/PRKCB/PRKCI/PRKCZ/PRKDC/PTK2/QDPR/RANGAP1/SCAP/SESN2/SLC9A1/SMARCC1/SOCS7/SPARC/STAT5B/TBC1D4/TIMP1/TRIM24/TRPV1/TSC2/UCP2	45
GO:0044770	cell cycle phase transition	55	1167	477	16672	0.000174317	0.01997	0.0183109	ACVR1/APP/BACH1/BAX/BRD4/BUB1/BUB1B/CCNY/CDC27/CDK14/CDK3/CDKN1B/CEP250/CEP72/CNOT10/CRLF3/CUL4A/DBF4B/DDB1/EIF4EBP1/ERCC2/FAM83D/JADE1/KANK2/KNTC1/LATS2/MCM5/MCM7/MELK/NEK2/NEK6/NINL/ORC1/ORC2/PDPN/PLAGL1/PLCB1/PLK1/POLA2/POLE/PPP1R12A/PPP3CA/PRKDC/RANBP1/RFWD3/RPS6/SFI1/TMOD3/TOPBP1/TPR/TPRA1/TPX2/TUBA1A/UBA52/UBE2L3	55
GO:0022613	ribonucleoprotein complex biogenesis	52	1167	462	16672	0.000462613	0.0427873	0.0392325	AAR2/AGO1/AGO3/BOP1/CELF1/CIRBP/DIS3L2/EIF2S3/EIF3F/EIF4B/ERI3/EXOSC4/GEMIN5/GNL3/MPHOSPH10/NOP58/PATL2/PELP1/PRPF3/RBM5/RPL13A/RPL18A/RPL34/RPL35A/RPL37A/RPL39/RPL5/RPL7A/RPL8/RPLP0/RPLP1/RPLP2/RPS11/RPS12/RPS14/RPS16/RPS19/RPS20/RPS21/RPS4X/RPS5/RPS6/RPS8/RPS9/RRP1B/RUVBL1/RUVBL2/SCAF11/SNUPN/UBA52/WDR37/XPO1	52

## Sheet: BP_down
GO analysis BP_down
ID	Description	count	listtotal	pophits	poptotal	pvalue	p.adjust	qvalue	geneID	Count
GO:0044770	cell cycle phase transition	78	986	477	16672	1.52e-16	4.59e-13	4.06e-13	ADAM17/APC/ATM/AURKA/BACH1/BTRC/BUB1B/CACUL1/CCNB1/CCNE2/CCNY/CDC14A/CDC25C/CDC27/CDC73/CDK5RAP2/CEP192/CEP57/CLASP1/CLASP2/CLSPN/CNOT1/CNOT10/CNOT6/CNOT6L/CTDP1/CUL2/DDB1/DLGAP5/EP300/EZH2/FANCI/FBXO7/FGFR1OP/GIGYF2/HAUS1/HAUS6/INO80/KIF14/KNTC1/LCMT1/MASTL/MCM10/MDM2/MELK/NDE1/NEDD1/NPAT/NSMCE2/ORC4/ORC5/PCM1/PCNT/PHF8/PIAS1/PKD2/POLA1/POLE2/PRIM1/PSME3/PTEN/RBL2/RDX/RFWD3/RPA1/SIN3A/SKP1/STXBP…	78
GO:0044772	mitotic cell cycle phase transition	75	986	450	16672	2.06e-16	4.59e-13	4.06e-13	ADAM17/APC/ATM/AURKA/BACH1/BTRC/BUB1B/CACUL1/CCNB1/CCNE2/CCNY/CDC14A/CDC25C/CDC27/CDC73/CDK5RAP2/CEP192/CEP57/CLASP1/CLASP2/CLSPN/CNOT1/CNOT10/CNOT6/CNOT6L/CTDP1/CUL2/DDB1/DLGAP5/EP300/EZH2/FANCI/FBXO7/FGFR1OP/GIGYF2/HAUS1/HAUS6/INO80/KIF14/KNTC1/LCMT1/MASTL/MCM10/MDM2/MELK/NDE1/NEDD1/NPAT/NSMCE2/ORC4/ORC5/PCM1/PCNT/PHF8/PIAS1/PKD2/POLA1/POLE2/PRIM1/PSME3/PTEN/RBL2/RDX/RFWD3/RPA1/SIN3A/SKP1/TAOK3…	75
GO:0018205	peptidyl-lysine modification	66	986	397	16672	1.6e-14	2.37e-11	2.1e-11	ASH1L/ASH2L/ATF2/ATP7A/ATRX/BRCA1/CAMKMT/CDYL/CREBBP/DNMT1/DOT1L/EED/ELP3/EP300/EZH1/EZH2/HAT1/HNRNPC/JARID2/KANSL1/KDM1A/KIAA1586/KMT2C/KMT2E/MDM2/NCOA1/NCOA2/NSD1/NSMCE2/NUP107/NUP153/NUP35/NUP50/NUP54/NUP88/NUP98/NUPL2/PHC3/PHF20/PIAS1/POM121/POM121C/PRDM2/RANBP2/RLF/RPA1/SENP6/SETD2/SETD3/SIN3A/SIRT5/SMAD4/SMC1A/SP100/STAG2/SUV39H2/TADA2A/TGFB1/TOP1/TRRAP/UBA2/UBE2I/WHSC1/WHSC1L1/YEATS4/ZNF451	66
GO:0016570	histone modification	69	986	429	16672	2.15e-14	2.39e-11	2.12e-11	ASH1L/ASH2L/ASXL1/ATF2/ATM/ATRX/AURKA/BRCA1/CCNB1/CDC73/CDYL/CREBBP/DDB1/DNMT1/DOT1L/EED/ELK4/ELP3/EP300/EYA3/EZH1/EZH2/HAT1/HUWE1/JARID2/KANSL1/KDM1A/KDM1B/KDM4B/KDM4C/KDM5A/KDM7A/KMT2C/KMT2E/MAPK8/NCOA1/NCOA2/NIPBL/NSD1/PHF20/PHF21A/PHF8/PRDM2/PRKCA/PRKCB/RLF/SATB1/SETD2/SETD3/SIN3A/SKP1/SMAD4/SUV39H2/SUZ12/TADA2A/TGFB1/TRIP12/TRRAP/UBR2/UBR5/UIMC1/USP15/USP3/USP49/VRK1/WHSC1/WHSC1L1/YEATS4/ZNF…	69
GO:0007059	chromosome segregation	52	986	318	16672	1.99e-11	1.77e-08	1.57e-08	ACTR2/ACTR3/AHCTF1/APC/ARL8B/ATM/ATRX/BRCA1/BUB1B/CCNB1/CDC14A/CDC27/CDK5RAP2/CENPH/CEP57/CEP57L1/CHMP5/CLASP1/CLASP2/DLGAP5/DMC1/ECT2/ESCO1/INO80/ITGB3BP/KIF14/KIF18A/KNTC1/LCMT1/NCAPG/NDE1/NEK9/NIPBL/NSMCE2/NUP107/NUP98/NUSAP1/PDS5A/PDS5B/PRC1/RAD18/RANBP2/SKA3/SMC1A/STAG2/TAOK1/TLK2/TOP1/UBE2I/XPO1/ZNF207/ZWILCH	52
GO:0000075	cell cycle checkpoint	40	986	221	16672	1.92e-10	1.43e-07	1.26e-07	APC/ATF2/ATM/AURKA/BRCA1/BRIP1/BUB1B/CCNB1/CCNE2/CDC25C/CDK5RAP2/CLSPN/CNOT1/CNOT10/CNOT6/CNOT6L/DLG1/DNA2/DOT1L/DTL/EP300/FANCI/GIGYF2/KNTC1/LCMT1/MDM2/NSUN2/PTPN11/RBL2/RFWD3/SMC1A/TAOK1/TAOK3/TFDP1/TFDP2/TGFB1/TIPIN/UIMC1/ZNF207/ZWILCH	40
GO:0000819	sister chromatid segregation	39	986	213	16672	2.28e-10	1.45e-07	1.28e-07	AHCTF1/APC/ATM/ATRX/BUB1B/CCNB1/CDC14A/CDC27/CENPH/CEP57/CEP57L1/CHMP5/CLASP1/CLASP2/DLGAP5/ESCO1/INO80/ITGB3BP/KIF14/KIF18A/KNTC1/LCMT1/NCAPG/NDE1/NIPBL/NSMCE2/NUP107/NUP98/NUSAP1/PDS5A/PDS5B/PRC1/RANBP2/SMC1A/STAG2/TAOK1/XPO1/ZNF207/ZWILCH	39
GO:0007067	mitotic nuclear division	60	986	429	16672	4.04e-10	2.25e-07	1.99e-07	APC/ATM/ATRX/AURKA/BIRC6/BUB1B/CCNB1/CDC14A/CDC25C/CDC27/CEP57/CEP57L1/CHMP5/CLASP1/CLASP2/CTDP1/DLGAP5/FLNA/HAUS1/HAUS6/INO80/ITGB3BP/KIF14/KIF15/KIF18A/KIF3B/KNTC1/LCMT1/MASTL/MYBL2/NCAPG/NDE1/NEDD1/NEK1/NEK4/NEK9/NIPBL/NSMCE2/NSUN2/NUP88/NUSAP1/PBRM1/PDS5A/PDS5B/PHIP/PRC1/SEPT2/SKA3/SMC1A/STAG2/TGFB1/TIPIN/TPX2/TUBGCP3/TUBGCP4/UBE2I/VRK1/YEATS4/ZNF207/ZWILCH	60
GO:1901990	regulation of mitotic cell cycle phase transition	46	986	294	16672	1.28e-09	6.35e-07	5.63e-07	ADAM17/APC/ATM/AURKA/BTRC/BUB1B/CCNB1/CDC14A/CDC25C/CDC27/CDC73/CLSPN/CNOT1/CNOT10/CNOT6/CNOT6L/DDB1/DLGAP5/EP300/EZH2/FANCI/FBXO7/GIGYF2/INO80/KIF14/KNTC1/LCMT1/MDM2/NSMCE2/PKD2/PSMB1/PSMD1/PSME3/PSME4/PTEN/RBL2/RDX/RFWD3/SIN3A/SKP1/TAOK3/TFDP1/TFDP2/TGFB1/TMOD3/ZNF207	46
GO:0000082	G1/S transition of mitotic cell cycle	39	986	227	16672	1.56e-09	6.39e-07	5.65e-07	ADAM17/ATM/AURKA/BACH1/CACUL1/CCNB1/CCNE2/CDC25C/CDC73/CNOT1/CNOT10/CNOT6/CNOT6L/CUL2/EP300/EZH2/FBXO7/GIGYF2/INO80/KIF14/MCM10/MDM2/NPAT/ORC4/ORC5/PHF8/PIAS1/PKD2/POLA1/POLE2/PRIM1/PSME3/PTEN/RBL2/RDX/RFWD3/RPA1/TFDP1/TFDP2	39
GO:0044843	cell cycle G1/S phase transition	40	986	237	16672	1.65e-09	6.39e-07	5.65e-07	ADAM17/ATM/AURKA/BACH1/CACUL1/CCNB1/CCNE2/CDC25C/CDC73/CNOT1/CNOT10/CNOT6/CNOT6L/CUL2/EP300/EZH2/FBXO7/GIGYF2/INO80/KIF14/MCM10/MDM2/NPAT/ORC4/ORC5/PHF8/PIAS1/PKD2/POLA1/POLE2/PRIM1/PSME3/PTEN/RBL2/RDX/RFWD3/RPA1/STXBP4/TFDP1/TFDP2	40
GO:0007077	mitotic nuclear envelope disassembly	16	986	44	16672	1.72e-09	6.39e-07	5.65e-07	CCNB1/NEK9/NUP107/NUP153/NUP35/NUP50/NUP54/NUP88/NUP98/NUPL2/POM121/POM121C/PRKCA/PRKCB/RANBP2/VRK1	16
GO:0098813	nuclear chromosome segregation	43	986	271	16672	2.88e-09	9.33e-07	8.26e-07	ACTR2/ACTR3/AHCTF1/APC/ATM/ATRX/BUB1B/CCNB1/CDC14A/CDC27/CENPH/CEP57/CEP57L1/CHMP5/CLASP1/CLASP2/DLGAP5/DMC1/ECT2/ESCO1/INO80/ITGB3BP/KIF14/KIF18A/KNTC1/LCMT1/NCAPG/NDE1/NIPBL/NSMCE2/NUP107/NUP98/NUSAP1/PDS5A/PDS5B/PRC1/RANBP2/SMC1A/STAG2/TAOK1/XPO1/ZNF207/ZWILCH	43
GO:0051168	nuclear export	34	986	185	16672	2.93e-09	9.33e-07	8.26e-07	AGFG1/ANP32B/BARD1/CPSF2/CSE1L/FIP1L1/GLE1/GSK3B/MDM2/NEMF/NUP107/NUP153/NUP35/NUP50/NUP54/NUP88/NUP98/NUPL2/PABPN1/POM121/POM121C/PTPN11/RANBP2/SETD2/SLBP/SMG1/SP100/SRSF4/TGFB1/UPF2/XPO1/XPO5/XPO7/ZC3H11A	34
GO:1901987	regulation of cell cycle phase transition	47	986	315	16672	4.13e-09	1.22e-06	1.08e-06	ADAM17/APC/ATM/AURKA/BTRC/BUB1B/CCNB1/CDC14A/CDC25C/CDC27/CDC73/CLSPN/CNOT1/CNOT10/CNOT6/CNOT6L/DDB1/DLGAP5/EP300/EZH2/FANCI/FBXO7/GIGYF2/INO80/KIF14/KNTC1/LCMT1/MDM2/NSMCE2/PKD2/PSMB1/PSMD1/PSME3/PSME4/PTEN/RBL2/RDX/RFWD3/SIN3A/SKP1/STXBP4/TAOK3/TFDP1/TFDP2/TGFB1/TMOD3/ZNF207	47
GO:0030397	membrane disassembly	16	986	47	16672	5.25e-09	1.37e-06	1.22e-06	CCNB1/NEK9/NUP107/NUP153/NUP35/NUP50/NUP54/NUP88/NUP98/NUPL2/POM121/POM121C/PRKCA/PRKCB/RANBP2/VRK1	16
GO:0051081	nuclear envelope disassembly	16	986	47	16672	5.25e-09	1.37e-06	1.22e-06	CCNB1/NEK9/NUP107/NUP153/NUP35/NUP50/NUP54/NUP88/NUP98/NUPL2/POM121/POM121C/PRKCA/PRKCB/RANBP2/VRK1	16
GO:0016925	protein sumoylation	27	986	130	16672	8.3e-09	2.05e-06	1.82e-06	BRCA1/HNRNPC/KIAA1586/MDM2/NSMCE2/NUP107/NUP153/NUP35/NUP50/NUP54/NUP88/NUP98/NUPL2/PHC3/PIAS1/POM121/POM121C/RANBP2/RPA1/SENP6/SMC1A/SP100/STAG2/TOP1/UBA2/UBE2I/ZNF451	27
GO:0007346	regulation of mitotic cell cycle	60	986	465	16672	9.23e-09	2.16e-06	1.91e-06	ADAM17/APC/ATF2/ATM/ATRX/AURKA/BTRC/BUB1B/CCNB1/CDC14A/CDC25C/CDC27/CDC73/CHMP5/CLSPN/CNOT1/CNOT10/CNOT6/CNOT6L/DDB1/DLG1/DLGAP5/EP300/EZH2/FANCI/FBXO7/GIGYF2/INO80/KIF14/KNTC1/LCMT1/MDM2/NEK7/NSMCE2/NUSAP1/PHIP/PKD2/PKN2/PRKCA/PSMB1/PSMD1/PSME3/PSME4/PTEN/PTPN11/RBL2/RDX/RFWD3/SIN3A/SKP1/SMC1A/TAOK3/TFDP1/TFDP2/TGFB1/TIPIN/TMOD3/TPX2/ZNF207/ZWILCH	60
GO:1900034	regulation of cellular response to heat	20	986	76	16672	1.04e-08	2.32e-06	2.05e-06	ATM/CREBBP/DNAJB6/EP300/GSK3B/MAPK1/NUP107/NUP153/NUP35/NUP50/NUP54/NUP88/NUP98/NUPL2/POM121/POM121C/PTGES3/RANBP2/RPA1/YWHAE	20
GO:0007093	mitotic cell cycle checkpoint	29	986	151	16672	1.52e-08	3.23e-06	2.86e-06	APC/ATF2/ATM/AURKA/BUB1B/CCNB1/CDC25C/CLSPN/CNOT1/CNOT10/CNOT6/CNOT6L/DLG1/EP300/FANCI/GIGYF2/KNTC1/LCMT1/MDM2/RBL2/RFWD3/SMC1A/TAOK3/TFDP1/TFDP2/TGFB1/TIPIN/ZNF207/ZWILCH	29
GO:0042787	protein ubiquitination involved in ubiquitin-dependent protein catabolic process	36	986	219	16672	2.19e-08	4.43e-06	3.92e-06	ANKIB1/AREL1/ARIH1/AURKA/BTRC/BUB1B/CACUL1/CCNB1/CDC27/CUL2/DDB1/DZIP3/FBXO7/HECTD1/HECTD2/HECTD4/HERC4/HUWE1/ITCH/KLHL8/MDM2/PSMB1/PSMD1/PSME3/PSME4/PTEN/PTK2/RMND5A/RNF217/RNF24/SKP1/TRIM25/TRIP12/UBE3A/UBE3C/UBR5	36
GO:0045930	negative regulation of mitotic cell cycle	35	986	210	16672	2.39e-08	4.63e-06	4.1e-06	APC/ATF2/ATM/ATRX/AURKA/BUB1B/CCNB1/CDC25C/CDC73/CLSPN/CNOT1/CNOT10/CNOT6/CNOT6L/DLG1/EP300/EZH2/FANCI/FBXO7/GIGYF2/KNTC1/LCMT1/MDM2/PKD2/PTEN/RBL2/RFWD3/SMC1A/TAOK3/TFDP1/TFDP2/TGFB1/TIPIN/ZNF207/ZWILCH	35
GO:0048193	Golgi vesicle transport	44	986	307	16672	4.37e-08	8.11e-06	7.18e-06	AP1G1/ARCN1/ATP8A1/ATP9B/C16orf62/COG2/COG3/COPA/CUX1/DOPEY2/EPS15/EXOC2/GOLGA1/GOSR1/KIF15/KIF16B/KIF18A/KIF3B/MON2/NAPG/NBAS/NRBP1/PITPNB/PPP6R3/RAB6A/RGPD4/RGPD5/SCFD1/SEC22A/SEC24B/SEC31A/SNX1/STX17/STX6/TBC1D14/TMED2/TRAPPC6B/TRAPPC8/TRAPPC9/USO1/VAPA/VAPB/VPS13C/WIPI1	44
GO:0016458	gene silencing	38	986	248	16672	6.21e-08	1.11e-05	9.78e-06	AGO2/ATAD2/ATAD2B/CELF1/CNOT1/CNOT10/CNOT6/CNOT6L/DNMT1/DOT1L/DROSHA/FXR1/HAT1/HIST1H4E/METTL3/NUP107/NUP153/NUP35/NUP50/NUP54/NUP88/NUP98/NUPL2/PHF8/POM121/POM121C/RANBP2/SIN3A/SIRT5/SMAD2/SMARCA5/SOX6/TGFB1/TNRC6A/TSN/UBR2/UHRF2/XPO5	38
GO:0006479	protein methylation	29	986	163	16672	8.86e-08	1.45e-05	1.29e-05	ASH1L/ASH2L/ATRX/BRCA1/CAMKMT/DNMT1/DOT1L/EED/EZH1/EZH2/JARID2/KDM1A/KMT2C/KMT2E/LCMT1/NSD1/PCMT1/PCMTD1/PRDM2/RAB6A/RLF/SATB1/SETD2/SETD3/SMAD4/SUV39H2/SUZ12/WHSC1/WHSC1L1	29
GO:0008213	protein alkylation	29	986	163	16672	8.86e-08	1.45e-05	1.29e-05	ASH1L/ASH2L/ATRX/BRCA1/CAMKMT/DNMT1/DOT1L/EED/EZH1/EZH2/JARID2/KDM1A/KMT2C/KMT2E/LCMT1/NSD1/PCMT1/PCMTD1/PRDM2/RAB6A/RLF/SATB1/SETD2/SETD3/SMAD4/SUV39H2/SUZ12/WHSC1/WHSC1L1	29
GO:1901991	negative regulation of mitotic cell cycle phase transition	27	986	145	16672	9.3e-08	1.45e-05	1.29e-05	APC/ATM/AURKA/BUB1B/CCNB1/CDC25C/CDC73/CLSPN/CNOT1/CNOT10/CNOT6/CNOT6L/EP300/EZH2/FANCI/FBXO7/GIGYF2/LCMT1/MDM2/PKD2/PTEN/RBL2/RFWD3/TAOK3/TFDP1/TFDP2/ZNF207	27
GO:0034968	histone lysine methylation	22	986	102	16672	9.74e-08	1.45e-05	1.29e-05	ASH1L/ASH2L/ATRX/BRCA1/DNMT1/DOT1L/EED/EZH1/EZH2/JARID2/KDM1A/KMT2C/KMT2E/NSD1/PRDM2/RLF/SETD2/SETD3/SMAD4/SUV39H2/WHSC1/WHSC1L1	22
GO:0006403	RNA localization	33	986	202	16672	9.8e-08	1.45e-05	1.29e-05	AGFG1/AHCTF1/ATM/ATXN2/CCT2/CCT3/CPSF2/EXOSC10/FIP1L1/GLE1/NUP107/NUP153/NUP35/NUP50/NUP54/NUP88/NUP98/NUPL2/PABPN1/POM121/POM121C/QKI/RANBP2/SETD2/SLBP/SMG1/SRSF4/TCP1/UPF2/XPO1/XPO5/XPO7/ZC3H11A	33
GO:0043161	proteasome-mediated ubiquitin-dependent protein catabolic process	49	986	371	16672	1.04e-07	1.5e-05	1.33e-05	ANKIB1/APC/ARIH1/AURKA/BIRC2/BTRC/BUB1B/CCDC47/CCNB1/CDC27/CLEC16A/CRBN/DDB1/DERL1/DZIP3/FAF1/FBXO9/GSK3B/KIF14/MDM2/NFE2L2/PIAS1/POMT1/PPP2R5C/PSMB1/PSMD1/PSME3/PSME4/RAD23B/RFWD2/RMND5A/RNF138/RNF217/RNF24/RNF38/SKP1/SMARCC1/STT3B/TLK2/UBE2H/UBE2K/UBQLN1/UBR1/UBR2/UBXN2A/UBXN4/UGGT1/UGGT2/USP14	49
GO:0018022	peptidyl-lysine methylation	23	986	112	16672	1.3e-07	1.81e-05	1.6e-05	ASH1L/ASH2L/ATRX/BRCA1/CAMKMT/DNMT1/DOT1L/EED/EZH1/EZH2/JARID2/KDM1A/KMT2C/KMT2E/NSD1/PRDM2/RLF/SETD2/SETD3/SMAD4/SUV39H2/WHSC1/WHSC1L1	23
GO:0000077	DNA damage checkpoint	27	986	149	16672	1.66e-07	2.04e-05	1.8e-05	ATF2/ATM/AURKA/BRCA1/BRIP1/CCNB1/CDC25C/CLSPN/CNOT1/CNOT10/CNOT6/CNOT6L/DOT1L/DTL/EP300/FANCI/GIGYF2/MDM2/PTPN11/RBL2/RFWD3/TAOK1/TAOK3/TFDP1/TFDP2/TIPIN/UIMC1	27
GO:0006406	mRNA export from nucleus	22	986	105	16672	1.68e-07	2.04e-05	1.8e-05	AGFG1/CPSF2/FIP1L1/GLE1/NUP107/NUP153/NUP35/NUP50/NUP54/NUP88/NUP98/NUPL2/PABPN1/POM121/POM121C/RANBP2/SETD2/SLBP/SMG1/SRSF4/UPF2/ZC3H11A	22
GO:0071427	mRNA-containing ribonucleoprotein complex export from nucleus	22	986	105	16672	1.68e-07	2.04e-05	1.8e-05	AGFG1/CPSF2/FIP1L1/GLE1/NUP107/NUP153/NUP35/NUP50/NUP54/NUP88/NUP98/NUPL2/PABPN1/POM121/POM121C/RANBP2/SETD2/SLBP/SMG1/SRSF4/UPF2/ZC3H11A	22
GO:0016482	cytosolic transport	25	986	131	16672	1.69e-07	2.04e-05	1.8e-05	ACTR2/AP1G1/DOPEY2/EEA1/EPS15/EVI5/FAM21C/GOSR1/KIF16B/MAPK1/MON2/PIK3C3/RAB5A/RAB6A/RDX/RHOBTB3/SNX1/SNX5/SNX6/SPAG9/STX6/TBC1D14/VAMP3/VPS13C/WIPI1	25
GO:0051028	mRNA transport	26	986	140	16672	1.69e-07	2.04e-05	1.8e-05	AGFG1/AHCTF1/CPSF2/FIP1L1/GLE1/NUP107/NUP153/NUP35/NUP50/NUP54/NUP88/NUP98/NUPL2/PABPN1/POM121/POM121C/QKI/RANBP2/SETD2/SLBP/SMG1/SRSF4/UPF2/XPO1/XPO7/ZC3H11A	26
GO:0031570	DNA integrity checkpoint	28	986	159	16672	1.84e-07	2.15e-05	1.91e-05	ATF2/ATM/AURKA/BRCA1/BRIP1/CCNB1/CDC25C/CLSPN/CNOT1/CNOT10/CNOT6/CNOT6L/DNA2/DOT1L/DTL/EP300/FANCI/GIGYF2/MDM2/PTPN11/RBL2/RFWD3/TAOK1/TAOK3/TFDP1/TFDP2/TIPIN/UIMC1	28
GO:2000045	regulation of G1/S transition of mitotic cell cycle	25	986	132	16672	1.97e-07	2.24e-05	1.99e-05	ADAM17/ATM/AURKA/CCNB1/CDC25C/CDC73/CNOT1/CNOT10/CNOT6/CNOT6L/EP300/EZH2/FBXO7/GIGYF2/INO80/KIF14/MDM2/PKD2/PSME3/PTEN/RBL2/RDX/RFWD3/TFDP1/TFDP2	25
GO:1902806	regulation of cell cycle G1/S phase transition	26	986	142	16672	2.27e-07	2.52e-05	2.23e-05	ADAM17/ATM/AURKA/CCNB1/CDC25C/CDC73/CNOT1/CNOT10/CNOT6/CNOT6L/EP300/EZH2/FBXO7/GIGYF2/INO80/KIF14/MDM2/PKD2/PSME3/PTEN/RBL2/RDX/RFWD3/STXBP4/TFDP1/TFDP2	26
GO:2000134	negative regulation of G1/S transition of mitotic cell cycle	20	986	91	16672	2.67e-07	2.9e-05	2.57e-05	ATM/AURKA/CCNB1/CDC25C/CDC73/CNOT1/CNOT10/CNOT6/CNOT6L/EP300/EZH2/FBXO7/GIGYF2/MDM2/PKD2/PTEN/RBL2/RFWD3/TFDP1/TFDP2	20
GO:0051236	establishment of RNA localization	29	986	172	16672	2.92e-07	3.1e-05	2.74e-05	AGFG1/AHCTF1/ATM/ATXN2/CPSF2/FIP1L1/GLE1/NUP107/NUP153/NUP35/NUP50/NUP54/NUP88/NUP98/NUPL2/PABPN1/POM121/POM121C/QKI/RANBP2/SETD2/SLBP/SMG1/SRSF4/UPF2/XPO1/XPO5/XPO7/ZC3H11A	29
GO:0016197	endosomal transport	36	986	244	16672	3.57e-07	3.7e-05	3.28e-05	AP1G1/CHMP5/DENND1A/DENND1B/DOPEY2/EEA1/EPS15/EVI5/FAM21C/GOSR1/KIF16B/LYST/MAPK1/MON2/PICALM/PIK3C3/RAB12/RAB5A/RAB5C/RAB6A/RDX/RHOBTB3/SCYL2/SNX1/SNX5/SNX6/SPAG9/STAM/STX6/TBC1D14/USP6NL/VAMP3/VPS13C/VPS36/VPS37A/WIPI1	36
GO:0071426	ribonucleoprotein complex export from nucleus	23	986	119	16672	4.12e-07	4.12e-05	3.65e-05	AGFG1/CPSF2/FIP1L1/GLE1/NUP107/NUP153/NUP35/NUP50/NUP54/NUP88/NUP98/NUPL2/PABPN1/POM121/POM121C/RANBP2/SETD2/SLBP/SMG1/SRSF4/UPF2/XPO1/ZC3H11A	23
GO:0040029	regulation of gene expression, epigenetic	37	986	256	16672	4.16e-07	4.12e-05	3.65e-05	AEBP2/AGO2/ATAD2/ATAD2B/BRCA1/CELF1/CNOT1/CNOT6/DDX21/DEK/DNMT1/DOT1L/DROSHA/EED/EP300/ERCC6/EXOSC10/EZH2/FXR1/GSK3B/HAT1/HIST1H4E/JARID2/KDM1B/METTL3/PHF8/SIN3A/SIRT5/SMAD2/SMARCA5/SMARCD1/SUZ12/TGFB1/TNRC6A/UBR2/UHRF2/XPO5	37
GO:1901988	negative regulation of cell cycle phase transition	27	986	156	16672	4.35e-07	4.21e-05	3.72e-05	APC/ATM/AURKA/BUB1B/CCNB1/CDC25C/CDC73/CLSPN/CNOT1/CNOT10/CNOT6/CNOT6L/EP300/EZH2/FANCI/FBXO7/GIGYF2/LCMT1/MDM2/PKD2/PTEN/RBL2/RFWD3/TAOK3/TFDP1/TFDP2/ZNF207	27
GO:1902807	negative regulation of cell cycle G1/S phase transition	20	986	94	16672	4.67e-07	4.42e-05	3.91e-05	ATM/AURKA/CCNB1/CDC25C/CDC73/CNOT1/CNOT10/CNOT6/CNOT6L/EP300/EZH2/FBXO7/GIGYF2/MDM2/PKD2/PTEN/RBL2/RFWD3/TFDP1/TFDP2	20
GO:0018105	peptidyl-serine phosphorylation	36	986	247	16672	4.84e-07	4.49e-05	3.97e-05	AKT2/AKT3/ATM/AURKA/BRAF/CAPRIN2/CCNB1/CD44/CLK1/CLSPN/CSNK1G3/DYRK1A/FNIP1/GSK3B/HIPK3/MAPK1/MAPK8/MASTL/MORC3/NLK/NSD1/PAK2/PDCD10/PKN2/PRKCA/PRKCB/RICTOR/SMG1/STK38/STK39/STK4/TGFB1/TLK2/TTBK2/VRK1/VRK2	36
GO:0016571	histone methylation	24	986	130	16672	5.61e-07	5e-05	4.43e-05	ASH1L/ASH2L/ATRX/BRCA1/DNMT1/DOT1L/EED/EZH1/EZH2/JARID2/KDM1A/KMT2C/KMT2E/NSD1/PRDM2/RLF/SATB1/SETD2/SETD3/SMAD4/SUV39H2/SUZ12/WHSC1/WHSC1L1	24
GO:0006405	RNA export from nucleus	23	986	121	16672	5.62e-07	5e-05	4.43e-05	AGFG1/CPSF2/FIP1L1/GLE1/NUP107/NUP153/NUP35/NUP50/NUP54/NUP88/NUP98/NUPL2/PABPN1/POM121/POM121C/RANBP2/SETD2/SLBP/SMG1/SRSF4/UPF2/XPO5/ZC3H11A	23
GO:0018209	peptidyl-serine modification	37	986	260	16672	6.15e-07	5.36e-05	4.75e-05	AKT2/AKT3/ATM/AURKA/BRAF/CAPRIN2/CCNB1/CD44/CLK1/CLSPN/CSNK1G3/DYRK1A/FNIP1/GALNT2/GSK3B/HIPK3/MAPK1/MAPK8/MASTL/MORC3/NLK/NSD1/PAK2/PDCD10/PKN2/PRKCA/PRKCB/RICTOR/SMG1/STK38/STK39/STK4/TGFB1/TLK2/TTBK2/VRK1/VRK2	37
GO:0071166	ribonucleoprotein complex localization	23	986	122	16672	6.54e-07	5.45e-05	4.82e-05	AGFG1/CPSF2/FIP1L1/GLE1/NUP107/NUP153/NUP35/NUP50/NUP54/NUP88/NUP98/NUPL2/PABPN1/POM121/POM121C/RANBP2/SETD2/SLBP/SMG1/SRSF4/UPF2/XPO1/ZC3H11A	23
GO:0010948	negative regulation of cell cycle process	33	986	219	16672	6.7e-07	5.45e-05	4.82e-05	APC/ATM/ATRX/AURKA/BRCA1/BUB1B/CCNB1/CDC25C/CDC73/CDK5RAP2/CLSPN/CNOT1/CNOT10/CNOT6/CNOT6L/EP300/EZH2/FANCI/FBXO7/GIGYF2/LCMT1/MDM2/PKD2/PTEN/RBL2/RFWD3/SMC1A/STAG2/TAOK3/TERF2/TFDP1/TFDP2/ZNF207	33
GO:0050657	nucleic acid transport	28	986	169	16672	6.73e-07	5.45e-05	4.82e-05	AGFG1/AHCTF1/ATXN2/CPSF2/FIP1L1/GLE1/NUP107/NUP153/NUP35/NUP50/NUP54/NUP88/NUP98/NUPL2/PABPN1/POM121/POM121C/QKI/RANBP2/SETD2/SLBP/SMG1/SRSF4/UPF2/XPO1/XPO5/XPO7/ZC3H11A	28
GO:0050658	RNA transport	28	986	169	16672	6.73e-07	5.45e-05	4.82e-05	AGFG1/AHCTF1/ATXN2/CPSF2/FIP1L1/GLE1/NUP107/NUP153/NUP35/NUP50/NUP54/NUP88/NUP98/NUPL2/PABPN1/POM121/POM121C/QKI/RANBP2/SETD2/SLBP/SMG1/SRSF4/UPF2/XPO1/XPO5/XPO7/ZC3H11A	28
GO:0007034	vacuolar transport	38	986	272	16672	6.95e-07	5.53e-05	4.89e-05	AP1G1/CHMP5/DENND1A/DENND1B/DOPEY2/EEA1/EPS15/EVI5/FAM21C/GOSR1/KIF16B/LYST/MAPK1/MON2/PICALM/PIK3C3/RAB12/RAB5A/RAB5C/RAB6A/RDX/RHOBTB3/SCYL2/SNX1/SNX5/SNX6/SPAG9/STAM/STX6/TBC1D14/TMEM106B/TRAPPC8/USP6NL/VAMP3/VPS13C/VPS36/VPS37A/WIPI1	38
GO:0000226	microtubule cytoskeleton organization	50	986	407	16672	7.26e-07	5.65e-05	5.01e-05	APC/AURKA/BRCA1/CDC14A/CDK5RAP2/CEP192/CEP350/CEP57/CEP57L1/CHMP5/CLASP1/CLASP2/DLG1/FGFR1OP/FLNA/GAS2L3/GPSM2/HAUS1/HAUS6/HDGFRP3/INO80/KIF18A/KIF3B/MARK3/MYBL2/NDE1/NEK7/NUSAP1/PCM1/PCNT/PDCD6IP/PKD2/PRC1/PTK2/RANBP9/ROCK2/SENP6/SKA3/SLAIN2/SLK/SS18/STIL/TBCD/TPX2/TUBGCP3/TUBGCP4/USP33/WDR62/XPO1/ZNF207	50
GO:0006397	mRNA processing	55	986	466	16672	7.41e-07	5.65e-05	5.01e-05	AGGF1/BARD1/CCAR1/CCNB1/CDC73/CELF1/CLNS1A/CNOT6L/CPEB1/CPSF2/CPSF6/CSTF3/CWC27/DYRK1A/FIP1L1/GCFC2/HNRNPC/HNRNPD/HNRNPM/HNRNPUL1/KDM1A/KIAA1429/LUC7L3/MBNL1/METTL3/PABPN1/PAN3/PAPD4/PAPOLA/PAPOLG/PNN/PPIL3/PSPC1/PTBP3/QKI/RALY/RBM23/RBM39/RBM41/RSRC1/SAFB/SCAF8/SLBP/SLTM/SNRNP48/SRSF4/SYMPK/SYNCRIP/TRA2B/TSEN2/TXNL4B/USP4/USP49/XRN2/ZC3H11A	55
GO:0000070	mitotic sister chromatid segregation	24	986	132	16672	7.5e-07	5.65e-05	5.01e-05	APC/ATM/ATRX/BUB1B/CCNB1/CDC14A/CDC27/CEP57/CEP57L1/CHMP5/DLGAP5/INO80/KIF14/KIF18A/LCMT1/NCAPG/NIPBL/NSMCE2/NUSAP1/PDS5A/PDS5B/PRC1/SMC1A/ZNF207	24
GO:1902115	regulation of organelle assembly	24	986	133	16672	8.64e-07	6.41e-05	5.68e-05	ATG3/ATG5/ATXN2/BRCA1/CDK5RAP2/CHMP5/CNOT1/CNOT6/CNOT6L/MAPK9/MTMR3/PAN3/PDCD6IP/PIP4K2A/RAB5A/RDX/SCFD1/SENP6/SEPT9/SMAD4/STAM/STIL/TBC1D12/TBC1D14	24
GO:0007062	sister chromatid cohesion	23	986	124	16672	8.82e-07	6.44e-05	5.7e-05	AHCTF1/ATRX/BUB1B/CENPH/CLASP1/CLASP2/ESCO1/ITGB3BP/KIF18A/KNTC1/NDE1/NIPBL/NSMCE2/NUP107/NUP98/PDS5A/PDS5B/RANBP2/SMC1A/STAG2/TAOK1/XPO1/ZWILCH	23
GO:0010608	posttranscriptional regulation of gene expression	54	986	459	16672	1.03e-06	7.42e-05	6.56e-05	AGO2/AKT2/ATXN2/CAPRIN1/CAPRIN2/CELF1/CNOT1/CNOT10/CNOT6/CNOT6L/CPEB1/CPEB4/DCP2/DDX6/DROSHA/EEF2/EIF2AK1/EIF3B/EIF4A2/EIF4E3/EIF4ENIF1/EIF5B/EPRS/EXOSC1/FOXO3/FXR1/GIGYF2/GLE1/HNRNPC/HNRNPD/LARP1/LARP4B/LSM14A/MAPK1/METTL3/MTRF1/PAIP2/PARN/PRKCA/PSMB1/PSMD1/PSME3/PSME4/PTCD3/QKI/SEPSECS/SMAD2/SYNCRIP/TGFB1/TNPO1/TNRC6A/XPO1/XPO5/XRN1	54
GO:0090068	positive regulation of cell cycle process	34	986	234	16672	1.08e-06	7.6e-05	6.73e-05	ATM/ATRX/AURKA/BRCA1/CCNB1/CDC25C/CNOT1/CNOT10/CNOT6/CNOT6L/CSPP1/DLGAP5/ECT2/EP300/INO80/KIF14/KIF3B/MDM2/MED1/NSMCE2/NUSAP1/PHIP/PKD2/PKN2/RBL2/RDX/ROCK2/SIN3A/STXBP4/TFDP1/TFDP2/TGFB1/TMOD3/UHRF2	34
GO:0006913	nucleocytoplasmic transport	53	986	449	16672	1.17e-06	7.94e-05	7.03e-05	AGFG1/ANP32B/BARD1/CDH1/CEP57/CPSF2/CSE1L/ECT2/FAF1/FIP1L1/FLNA/GLE1/GNAQ/GSK3B/MAPK1/MDM2/MED1/NEMF/NUP107/NUP153/NUP35/NUP50/NUP54/NUP88/NUP98/NUPL2/PABPN1/PDIA3/PKD2/POM121/POM121C/PPM1B/PTPN11/RAB23/RANBP2/RERE/RSRC1/SETD2/SLBP/SMAD4/SMG1/SP100/SPPL3/SRSF4/TGFB1/TNPO1/TNPO3/UBR5/UPF2/XPO1/XPO5/XPO7/ZC3H11A	53
GO:0010498	proteasomal protein catabolic process	49	986	402	16672	1.18e-06	7.94e-05	7.03e-05	ANKIB1/APC/ARIH1/AURKA/BIRC2/BTRC/BUB1B/CCDC47/CCNB1/CDC27/CLEC16A/CRBN/DDB1/DERL1/DZIP3/FAF1/FBXO9/GSK3B/KIF14/MDM2/NFE2L2/PIAS1/POMT1/PPP2R5C/PSMB1/PSMD1/PSME3/PSME4/RAD23B/RFWD2/RMND5A/RNF138/RNF217/RNF24/RNF38/SKP1/SMARCC1/STT3B/TLK2/UBE2H/UBE2K/UBQLN1/UBR1/UBR2/UBXN2A/UBXN4/UGGT1/UGGT2/USP14	49
GO:0006409	tRNA export from nucleus	11	986	32	16672	1.2e-06	7.94e-05	7.03e-05	NUP107/NUP153/NUP35/NUP50/NUP54/NUP88/NUP98/NUPL2/POM121/POM121C/RANBP2	11
GO:0071431	tRNA-containing ribonucleoprotein complex export from nucleus	11	986	32	16672	1.2e-06	7.94e-05	7.03e-05	NUP107/NUP153/NUP35/NUP50/NUP54/NUP88/NUP98/NUPL2/POM121/POM121C/RANBP2	11
GO:0000209	protein polyubiquitination	35	986	248	16672	1.5e-06	9.8e-05	8.67e-05	ANKIB1/ARIH1/BARD1/BIRC2/BRCA1/BTRC/CDC27/DTL/DZIP3/HECTD2/HUWE1/ITCH/PPIL2/PSMB1/PSMD1/PSME3/PSME4/PTPN22/RNF138/RNF217/RNF24/SHPRH/SKP1/TRIP12/UBE2D2/UBE2F/UBE2G1/UBE2H/UBE2K/UBE2L3/UBE2Q2/UBE3A/UBE3C/UBR2/UBR5	35
GO:1902275	regulation of chromatin organization	25	986	147	16672	1.61e-06	0.000103923	9.2e-05	ATAD2/ATAD2B/ATM/ATRX/BRCA1/CCNB1/DNMT1/EED/JARID2/KDM1A/KDM5A/MAPK8/NIPBL/NSD1/PHF8/SIN3A/SMAD4/TADA2A/TGFB1/TLK1/TLK2/TRIP12/UBR5/UHRF2/ZNF451	25
GO:0031047	gene silencing by RNA	26	986	157	16672	1.69e-06	0.000107247	9.49e-05	AGO2/CELF1/CNOT1/CNOT10/CNOT6/CNOT6L/DROSHA/FXR1/HIST1H4E/METTL3/NUP107/NUP153/NUP35/NUP50/NUP54/NUP88/NUP98/NUPL2/POM121/POM121C/RANBP2/SMAD2/TGFB1/TNRC6A/TSN/XPO5	26
GO:0044774	mitotic DNA integrity checkpoint	20	986	102	16672	1.83e-06	0.000114722	0.000101552	ATF2/ATM/AURKA/CCNB1/CDC25C/CLSPN/CNOT1/CNOT10/CNOT6/CNOT6L/EP300/FANCI/GIGYF2/MDM2/RBL2/RFWD3/TAOK3/TFDP1/TFDP2/TIPIN	20
GO:0051169	nuclear transport	53	986	457	16672	2.01e-06	0.000124109	0.00010986	AGFG1/ANP32B/BARD1/CDH1/CEP57/CPSF2/CSE1L/ECT2/FAF1/FIP1L1/FLNA/GLE1/GNAQ/GSK3B/MAPK1/MDM2/MED1/NEMF/NUP107/NUP153/NUP35/NUP50/NUP54/NUP88/NUP98/NUPL2/PABPN1/PDIA3/PKD2/POM121/POM121C/PPM1B/PTPN11/RAB23/RANBP2/RERE/RSRC1/SETD2/SLBP/SMAD4/SMG1/SP100/SPPL3/SRSF4/TGFB1/TNPO1/TNPO3/UBR5/UPF2/XPO1/XPO5/XPO7/ZC3H11A	53
GO:0007033	vacuole organization	31	986	209	16672	2.04e-06	0.000124597	0.000110292	ATG3/ATG5/CHMP5/CLEC16A/EEA1/LYST/MAN2A1/MFSD8/MTMR3/PDCD6IP/PIK3C2B/PIK3C3/PIP4K2A/RAB23/RAB27A/RAB5A/RB1CC1/SCFD1/STAM/STX17/STX6/TBC1D12/TBC1D14/TMEM106B/TMEM165/TRAPPC8/UBQLN1/USP8/VPS36/VPS37A/WIPI1	31
GO:0051031	tRNA transport	11	986	34	16672	2.38e-06	0.000142945	0.000126534	NUP107/NUP153/NUP35/NUP50/NUP54/NUP88/NUP98/NUPL2/POM121/POM121C/RANBP2	11
GO:0031023	microtubule organizing center organization	21	986	113	16672	2.53e-06	0.000149984	0.000132765	AURKA/BRCA1/CDK5RAP2/CEP192/CHMP5/CLASP1/CLASP2/HAUS1/HAUS6/KIF3B/NDE1/PCM1/PDCD6IP/PKD2/ROCK2/STIL/TUBGCP3/TUBGCP4/USP33/WDR62/XPO1	21
GO:0006260	DNA replication	38	986	287	16672	2.63e-06	0.000154175	0.000136475	ATM/ATRX/BARD1/BAZ1A/BRCA1/BRIP1/CCNE2/CDC25C/CLSPN/DNA2/DTL/ESCO1/INO80/MAP2K4/MCM10/NUP98/ORC4/ORC5/PDS5A/POLA1/POLE2/PRIM1/PRIMPOL/RAC1/REV1/RFC1/RFC2/RPA1/SIN3A/SLBP/SMC1A/STAG2/SUPT16H/TERF2/TGFB1/TIPIN/TOP1/ZRANB3	38
GO:0007052	mitotic spindle organization	13	986	48	16672	2.78e-06	0.000160602	0.000142164	AURKA/CCNB1/CDC14A/CLASP1/CLASP2/GPSM2/KIF3B/PCNT/PRC1/SMC1A/STIL/TPX2/WDR62	13
GO:0044773	mitotic DNA damage checkpoint	19	986	96	16672	2.85e-06	0.000162552	0.00014389	ATF2/ATM/AURKA/CCNB1/CDC25C/CNOT1/CNOT10/CNOT6/CNOT6L/EP300/FANCI/GIGYF2/MDM2/RBL2/RFWD3/TAOK3/TFDP1/TFDP2/TIPIN	19
GO:0030330	DNA damage response, signal transduction by p53 class mediator	20	986	105	16672	2.93e-06	0.000165276	0.000146301	ATM/ATRX/AURKA/BRCA1/CCNB1/CD44/CDC25C/CNOT1/CNOT10/CNOT6/CNOT6L/DYRK1A/EP300/FOXO3/KDM1A/MDM2/RBL2/SP100/TFDP1/TFDP2	20
GO:0017148	negative regulation of translation	24	986	143	16672	3.29e-06	0.000182365	0.000161429	AGO2/CAPRIN1/CAPRIN2/CELF1/CNOT1/CNOT6/CNOT6L/CPEB1/CPEB4/DROSHA/EIF2AK1/EIF4ENIF1/EPRS/FXR1/GIGYF2/HNRNPD/METTL3/PAIP2/QKI/SMAD2/SYNCRIP/TGFB1/TNRC6A/XPO5	24
GO:0006417	regulation of translation	42	986	335	16672	3.32e-06	0.000182365	0.000161429	AGO2/AKT2/ATXN2/CAPRIN1/CAPRIN2/CELF1/CNOT1/CNOT10/CNOT6/CNOT6L/CPEB1/CPEB4/DDX6/DROSHA/EEF2/EIF2AK1/EIF3B/EIF4A2/EIF4E3/EIF4ENIF1/EIF5B/EPRS/FOXO3/FXR1/GIGYF2/GLE1/HNRNPD/LARP1/LARP4B/LSM14A/MAPK1/METTL3/MTRF1/PAIP2/PTCD3/QKI/SEPSECS/SMAD2/SYNCRIP/TGFB1/TNRC6A/XPO5	42
GO:0000086	G2/M transition of mitotic cell cycle	28	986	185	16672	4.24e-06	0.000230052	0.00020364	ATM/AURKA/BACH1/BTRC/CCNB1/CCNY/CDC25C/CDK5RAP2/CEP192/CEP57/CLASP1/CLSPN/FANCI/FGFR1OP/HAUS1/HAUS6/KIF14/MASTL/MELK/NDE1/NEDD1/PCM1/PCNT/SIN3A/SKP1/TAOK3/TPX2/YWHAE	28
GO:0034605	cellular response to heat	20	986	108	16672	4.61e-06	0.000247201	0.000218821	ATM/CREBBP/DNAJB6/EP300/GSK3B/MAPK1/NUP107/NUP153/NUP35/NUP50/NUP54/NUP88/NUP98/NUPL2/POM121/POM121C/PTGES3/RANBP2/RPA1/YWHAE	20
GO:0006998	nuclear envelope organization	17	986	82	16672	4.87e-06	0.000251988	0.000223058	CCNB1/NEK9/NUP107/NUP153/NUP35/NUP50/NUP54/NUP88/NUP98/NUPL2/POM121/POM121C/PRKCA/PRKCB/RANBP2/UBXN2A/VRK1	17
GO:0051225	spindle assembly	17	986	82	16672	4.87e-06	0.000251988	0.000223058	AURKA/CDC14A/CEP192/CHMP5/CLASP1/FLNA/HAUS1/HAUS6/INO80/KIF3B/MYBL2/NEK7/SENP6/TPX2/TUBGCP3/TUBGCP4/ZNF207	17
GO:0071158	positive regulation of cell cycle arrest	17	986	82	16672	4.87e-06	0.000251988	0.000223058	ATM/AURKA/BRCA1/CCNB1/CDC25C/CNOT1/CNOT10/CNOT6/CNOT6L/EP300/MDM2/PKD2/RBL2/TFDP1/TFDP2/TGFB1/UHRF2	17
GO:0044766	multi-organism transport	16	986	74	16672	5.19e-06	0.000260832	0.000230887	DERL1/EPS15/NUP107/NUP153/NUP35/NUP50/NUP54/NUP88/NUP98/NUPL2/POM121/POM121C/RANBP2/TCP1/VPS37A/XPO1	16
GO:1902579	multi-organism localization	16	986	74	16672	5.19e-06	0.000260832	0.000230887	DERL1/EPS15/NUP107/NUP153/NUP35/NUP50/NUP54/NUP88/NUP98/NUPL2/POM121/POM121C/RANBP2/TCP1/VPS37A/XPO1	16
GO:0006997	nucleus organization	23	986	137	16672	5.22e-06	0.000260832	0.000230887	AGFG1/AHCTF1/CCNB1/CHMP5/ETS1/NEK9/NUP107/NUP153/NUP35/NUP50/NUP54/NUP88/NUP98/NUPL2/PITPNB/POM121/POM121C/PRKCA/PRKCB/PSME4/RANBP2/UBXN2A/VRK1	23
GO:0006470	protein dephosphorylation	35	986	262	16672	5.3e-06	0.000262175	0.000232076	BTRC/CDC14A/CDC25C/CTDP1/DLG1/DLGAP5/DNAJC6/EYA3/ILKAP/MASTL/MTMR1/MTMR3/PHLPP2/PPA2/PPM1B/PPP2R3B/PPP2R5C/PPP4R1/PPP6R3/PTEN/PTP4A2/PTPN11/PTPN12/PTPN22/PTPN4/PTPRA/ROCK2/RPAP2/RPRD1A/SDHAF2/SPPL3/SSH2/SYMPK/TGFB1/YWHAE	35
GO:0007051	spindle organization	19	986	100	16672	5.36e-06	0.000262306	0.000232191	AURKA/CDC14A/CEP192/CHMP5/CLASP1/DLG1/FLNA/HAUS1/HAUS6/INO80/KIF3B/MYBL2/NEK7/PRC1/SENP6/TPX2/TUBGCP3/TUBGCP4/ZNF207	19
GO:0034248	regulation of cellular amide metabolic process	44	986	366	16672	5.89e-06	0.000284333	0.00025169	AGO2/AKT2/ATXN2/CAPRIN1/CAPRIN2/CELF1/CNOT1/CNOT10/CNOT6/CNOT6L/CPEB1/CPEB4/DDX6/DROSHA/EEF2/EIF2AK1/EIF3B/EIF4A2/EIF4E3/EIF4ENIF1/EIF5B/EPRS/FOXO3/FXR1/GIGYF2/GLE1/HNRNPD/LARP1/LARP4B/LSM14A/MAPK1/METTL3/MTRF1/NFE2L2/PAIP2/PICALM/PTCD3/QKI/SEPSECS/SMAD2/SYNCRIP/TGFB1/TNRC6A/XPO5	44
GO:0042770	signal transduction in response to DNA damage	21	986	119	16672	5.94e-06	0.000284333	0.00025169	ATM/ATRX/AURKA/BRCA1/CCNB1/CD44/CDC25C/CNOT1/CNOT10/CNOT6/CNOT6L/DYRK1A/EP300/FOXO3/KDM1A/MDM2/RBL2/SMC1A/SP100/TFDP1/TFDP2	21
GO:1905268	negative regulation of chromatin organization	12	986	44	16672	6.2e-06	0.000292318	0.000258759	ATAD2/ATAD2B/BRCA1/DNMT1/JARID2/KDM1A/KDM5A/PHF8/SIN3A/TRIP12/UBR5/ZNF451	12
GO:0007098	centrosome cycle	16	986	75	16672	6.24e-06	0.000292318	0.000258759	AURKA/BRCA1/CDK5RAP2/CEP192/CHMP5/KIF3B/NDE1/PDCD6IP/PKD2/ROCK2/STIL/TUBGCP3/TUBGCP4/USP33/WDR62/XPO1	16
GO:0051298	centrosome duplication	14	986	60	16672	7.85e-06	0.00036401	0.00032222	BRCA1/CDK5RAP2/CEP192/CHMP5/NDE1/PDCD6IP/PKD2/ROCK2/STIL/TUBGCP3/TUBGCP4/USP33/WDR62/XPO1	14
GO:0034249	negative regulation of cellular amide metabolic process	24	986	151	16672	8.67e-06	0.000398008	0.000352314	AGO2/CAPRIN1/CAPRIN2/CELF1/CNOT1/CNOT6/CNOT6L/CPEB1/CPEB4/DROSHA/EIF2AK1/EIF4ENIF1/EPRS/FXR1/GIGYF2/HNRNPD/METTL3/PAIP2/QKI/SMAD2/SYNCRIP/TGFB1/TNRC6A/XPO5	24
GO:0015931	nucleobase-containing compound transport	29	986	203	16672	9.15e-06	0.00041569	0.000367967	AGFG1/AHCTF1/ATXN2/CPSF2/FIP1L1/GLE1/NUP107/NUP153/NUP35/NUP50/NUP54/NUP88/NUP98/NUPL2/PABPN1/POM121/POM121C/QKI/RANBP2/SETD2/SLBP/SLC35D2/SMG1/SRSF4/UPF2/XPO1/XPO5/XPO7/ZC3H11A	29
GO:0031571	mitotic G1 DNA damage checkpoint	15	986	69	16672	9.49e-06	0.000422319	0.000373834	ATM/AURKA/CCNB1/CDC25C/CNOT1/CNOT10/CNOT6/CNOT6L/EP300/GIGYF2/MDM2/RBL2/RFWD3/TFDP1/TFDP2	15
GO:0044819	mitotic G1/S transition checkpoint	15	986	69	16672	9.49e-06	0.000422319	0.000373834	ATM/AURKA/CCNB1/CDC25C/CNOT1/CNOT10/CNOT6/CNOT6L/EP300/GIGYF2/MDM2/RBL2/RFWD3/TFDP1/TFDP2	15
GO:0033962	cytoplasmic mRNA processing body assembly	8	986	20	16672	9.67e-06	0.000424567	0.000375825	ATXN2/CNOT1/CNOT6/CNOT6L/DDX6/LSM14A/PAN3/PATL1	8
GO:0051297	centrosome organization	19	986	104	16672	9.73e-06	0.000424567	0.000375825	AURKA/BRCA1/CDK5RAP2/CEP192/CHMP5/HAUS1/HAUS6/KIF3B/NDE1/PCM1/PDCD6IP/PKD2/ROCK2/STIL/TUBGCP3/TUBGCP4/USP33/WDR62/XPO1	19
GO:0045787	positive regulation of cell cycle	39	986	315	16672	9.94e-06	0.000429363	0.00038007	ADAM17/ATM/ATRX/AURKA/BRCA1/CCNB1/CCNT2/CCNY/CDC25C/CNOT1/CNOT10/CNOT6/CNOT6L/CSPP1/DLGAP5/ECT2/EP300/INO80/KIF14/KIF3B/MDM2/MED1/NSMCE2/NUSAP1/PHIP/PKD2/PKN2/PRKCA/PTPN11/RBL2/RDX/ROCK2/SIN3A/STXBP4/TFDP1/TFDP2/TGFB1/TMOD3/UHRF2	39
GO:0044839	cell cycle G2/M phase transition	28	986	194	16672	1.07e-05	0.000450231	0.000398542	ATM/AURKA/BACH1/BTRC/CCNB1/CCNY/CDC25C/CDK5RAP2/CEP192/CEP57/CLASP1/CLSPN/FANCI/FGFR1OP/HAUS1/HAUS6/KIF14/MASTL/MELK/NDE1/NEDD1/PCM1/PCNT/SIN3A/SKP1/TAOK3/TPX2/YWHAE	28
GO:0045786	negative regulation of cell cycle	50	986	447	16672	1.07e-05	0.000450231	0.000398542	AKT2/APC/ATF2/ATM/ATRX/AURKA/BARD1/BRCA1/BUB1B/CCNB1/CDC14A/CDC25C/CDC73/CDK5RAP2/CLSPN/CNOT1/CNOT10/CNOT6/CNOT6L/CUL2/DLG1/EP300/EZH2/FANCI/FBXO7/GIGYF2/KMT2E/KNTC1/LCMT1/MDM2/PKD2/PPP2R3B/PRKACB/PTEN/RBL2/RFWD3/RHEB/SMC1A/STAG2/STK11/TAOK3/TERF2/TFDP1/TFDP2/TGFB1/TIPIN/TP53BP2/UHRF2/ZNF207/ZWILCH	50
GO:0034504	protein localization to nucleus	42	986	351	16672	1.07e-05	0.000450231	0.000398542	BANP/CCT2/CCT3/CDH1/CEP57/CSE1L/DNAJB6/ECT2/FAF1/FLNA/GNAQ/GSK3B/MAPK1/MDM2/MED1/MORC3/NUP107/NUP153/NUP35/NUP50/NUP54/NUP88/NUP98/PDIA3/PKD2/POM121/POM121C/PPM1B/RAB23/RANBP2/RERE/SIN3A/SKP1/SMAD4/SPPL3/STK11/TCP1/TGFB1/TNPO1/TNPO3/UBR5/XPO1	42
GO:0044783	G1 DNA damage checkpoint	15	986	70	16672	1.14e-05	0.000470798	0.000416748	ATM/AURKA/CCNB1/CDC25C/CNOT1/CNOT10/CNOT6/CNOT6L/EP300/GIGYF2/MDM2/RBL2/RFWD3/TFDP1/TFDP2	15
GO:0046794	transport of virus	15	986	70	16672	1.14e-05	0.000470798	0.000416748	DERL1/EPS15/NUP107/NUP153/NUP35/NUP50/NUP54/NUP88/NUP98/NUPL2/POM121/POM121C/RANBP2/VPS37A/XPO1	15
GO:1905037	autophagosome organization	16	986	81	16672	1.75e-05	0.000710133	0.000628605	ATG3/ATG5/MTMR3/PIK3C2B/PIK3C3/PIP4K2A/RAB23/RAB5A/RB1CC1/SCFD1/STX17/TBC1D12/TBC1D14/TRAPPC8/UBQLN1/WIPI1	16
GO:0072331	signal transduction by p53 class mediator	33	986	254	16672	1.75e-05	0.000710133	0.000628605	ATM/ATRX/AURKA/BANP/BARD1/BRCA1/BRIP1/CCNB1/CD44/CDC25C/CNOT1/CNOT10/CNOT6/CNOT6L/DNA2/DYRK1A/EP300/FOXO3/KDM1A/MDM2/PHF20/RBL2/RFC2/RPA1/SP100/STK11/SUPT16H/TAF12/TFDP1/TFDP2/TP53BP2/TPX2/TRIM24	33
GO:0043414	macromolecule methylation	34	986	267	16672	2.02e-05	0.000808243	0.000715452	ASH1L/ASH2L/ATRX/BRCA1/CAMKMT/DNMT1/DOT1L/EED/EZH1/EZH2/GSK3B/JARID2/KDM1A/KDM1B/KIAA1429/KMT2C/KMT2E/LCMT1/METTL3/NSD1/NSUN2/PCMT1/PCMTD1/PRDM2/RAB6A/RLF/SATB1/SETD2/SETD3/SMAD4/SUV39H2/SUZ12/WHSC1/WHSC1L1	34
GO:0051640	organelle localization	51	986	471	16672	2.13e-05	0.000846359	0.000749192	ACTN4/ACTR2/ACTR3/ARL8B/ATM/AURKA/BRAF/CANX/CCNB1/CDK5RAP2/CHMP5/CLASP1/CLASP2/DENND1A/DLG1/DLGAP5/DNAJC5/GOSR1/GPSM2/HIF1A/ITGA4/KIF14/KIF18A/KIF3B/NDE1/NUP88/NUP98/NUSAP1/PCM1/PDCD10/PPP6R3/PTEN/PTK2/RAB27A/RAB5A/RAB6A/RABGEF1/RASGRP1/RHOT1/SCFD1/SEC24B/SEC31A/SPG11/STK11/TMED2/TMEM106B/TRAPPC6B/TRAPPC9/USO1/WIPI1/XPO1	51
GO:0016579	protein deubiquitination	21	986	129	16672	2.15e-05	0.000846359	0.000749192	ASXL1/FAM188A/ITCH/TANK/TRRAP/UCHL3/UIMC1/USP1/USP14/USP15/USP25/USP3/USP32/USP33/USP4/USP45/USP48/USP49/USP8/WDR20/ZRANB1	21
GO:0006611	protein export from nucleus	13	986	58	16672	2.62e-05	0.00102242	0.000905038	ANP32B/BARD1/CSE1L/GSK3B/MDM2/NUP88/NUPL2/PTPN11/SP100/TGFB1/XPO1/XPO5/XPO7	13
GO:0010827	regulation of glucose transport	18	986	102	16672	2.7e-05	0.00104641	0.000926273	ADIPOR2/AKT2/C2CD5/LMBRD1/NFE2L2/NUP107/NUP153/NUP35/NUP50/NUP54/NUP88/NUP98/NUPL2/POM121/POM121C/PRKCB/PTPN11/RANBP2	18
GO:0034453	microtubule anchoring	7	986	17	16672	2.85e-05	0.00109414	0.000968528	CEP350/CEP57/CEP57L1/CLASP1/CLASP2/FGFR1OP/PCM1	7
GO:0075733	intracellular transport of virus	14	986	67	16672	3.01e-05	0.00114419	0.00101283	DERL1/NUP107/NUP153/NUP35/NUP50/NUP54/NUP88/NUP98/NUPL2/POM121/POM121C/RANBP2/VPS37A/XPO1	14
GO:0000723	telomere maintenance	21	986	132	16672	3.07e-05	0.00115646	0.00102369	ATM/ATRX/CCT2/CCT3/DNA2/HIST1H4E/HNRNPC/MAPK1/NEK7/NSMCE2/POLA1/POLE2/PRIM1/PTGES3/RFC1/RFC2/RPA1/SMG1/SP100/TCP1/TERF2	21
GO:0071156	regulation of cell cycle arrest	18	986	103	16672	3.1e-05	0.00115876	0.00102572	AKT2/ATM/AURKA/BRCA1/CCNB1/CDC25C/CNOT1/CNOT10/CNOT6/CNOT6L/EP300/MDM2/PKD2/RBL2/TFDP1/TFDP2/TGFB1/UHRF2	18
GO:0006914	autophagy	47	986	428	16672	3.13e-05	0.00116179	0.00102841	ATG3/ATG5/ATM/ATP6V0A1/C6orf106/CLEC16A/DEPDC5/EP300/EXOC7/FBXO7/FUNDC1/HERC1/HIF1A/LARP1/LEPR/MAPK8/MTDH/MTMR3/PIK3C2B/PIK3C3/PIP4K2A/PLEKHM1/PSAP/PTPN22/RAB12/RAB23/RAB5A/RB1CC1/RHEB/SCFD1/SNX5/SNX6/STAM/STK11/STX17/SUPT20H/TBC1D12/TBC1D14/TLK2/TRAPPC8/UBQLN1/USP33/VMP1/VPS13C/VPS36/VPS37A/WIPI1	47
GO:1902581	multi-organism cellular localization	14	986	68	16672	3.58e-05	0.00130754	0.00115743	DERL1/NUP107/NUP153/NUP35/NUP50/NUP54/NUP88/NUP98/NUPL2/POM121/POM121C/RANBP2/VPS37A/XPO1	14
GO:1902583	multi-organism intracellular transport	14	986	68	16672	3.58e-05	0.00130754	0.00115743	DERL1/NUP107/NUP153/NUP35/NUP50/NUP54/NUP88/NUP98/NUPL2/POM121/POM121C/RANBP2/VPS37A/XPO1	14
GO:0006977	DNA damage response, signal transduction by p53 class mediator resulting in cell cycle arrest	13	986	60	16672	3.84e-05	0.00138995	0.00123037	ATM/AURKA/CCNB1/CDC25C/CNOT1/CNOT10/CNOT6/CNOT6L/EP300/MDM2/RBL2/TFDP1/TFDP2	13
GO:0032200	telomere organization	22	986	145	16672	4.24e-05	0.00152208	0.00134733	ATM/ATRX/CCT2/CCT3/DNA2/DOT1L/HIST1H4E/HNRNPC/MAPK1/NEK7/NSMCE2/POLA1/POLE2/PRIM1/PTGES3/RFC1/RFC2/RPA1/SMG1/SP100/TCP1/TERF2	22
GO:0006261	DNA-dependent DNA replication	21	986	135	16672	4.32e-05	0.0015342	0.00135807	ATRX/BAZ1A/CCNE2/DNA2/INO80/MCM10/ORC4/ORC5/POLA1/POLE2/PRIM1/PRIMPOL/RFC1/RFC2/RPA1/SLBP/SMC1A/STAG2/TERF2/TIPIN/ZRANB3	21
GO:0042176	regulation of protein catabolic process	41	986	360	16672	4.34e-05	0.0015342	0.00135807	ANKIB1/APC/ARIH1/AURKA/AZIN1/BANP/BARD1/BTRC/BUB1B/CCNB1/CDC27/CLEC16A/FAF1/FLNA/GSK3B/MDM2/NFE2L2/PIAS1/PSMB1/PSMD1/PSME3/PSME4/PTEN/PTK2/RAD23B/RDX/RFWD2/RNF138/RNF217/SKP1/SMARCC1/SNX1/TLK2/UBAC2/UBE2K/UBE3A/UBQLN1/UBXN2A/USP14/USP25/XPO1	41
GO:0072431	signal transduction involved in mitotic G1 DNA damage checkpoint	13	986	61	16672	4.62e-05	0.00160659	0.00142215	ATM/AURKA/CCNB1/CDC25C/CNOT1/CNOT10/CNOT6/CNOT6L/EP300/MDM2/RBL2/TFDP1/TFDP2	13
GO:1902400	intracellular signal transduction involved in G1 DNA damage checkpoint	13	986	61	16672	4.62e-05	0.00160659	0.00142215	ATM/AURKA/CCNB1/CDC25C/CNOT1/CNOT10/CNOT6/CNOT6L/EP300/MDM2/RBL2/TFDP1/TFDP2	13
GO:0070646	protein modification by small protein removal	22	986	146	16672	4.72e-05	0.00162839	0.00144144	ASXL1/FAM188A/ITCH/SENP6/TANK/TRRAP/UCHL3/UIMC1/USP1/USP14/USP15/USP25/USP3/USP32/USP33/USP4/USP45/USP48/USP49/USP8/WDR20/ZRANB1	22
GO:0000045	autophagosome assembly	15	986	79	16672	5.18e-05	0.00177444	0.00157072	ATG3/ATG5/MTMR3/PIK3C3/PIP4K2A/RAB23/RAB5A/RB1CC1/SCFD1/STX17/TBC1D12/TBC1D14/TRAPPC8/UBQLN1/WIPI1	15
GO:0072413	signal transduction involved in mitotic cell cycle checkpoint	13	986	62	16672	5.53e-05	0.0018518	0.0016392	ATM/AURKA/CCNB1/CDC25C/CNOT1/CNOT10/CNOT6/CNOT6L/EP300/MDM2/RBL2/TFDP1/TFDP2	13
GO:1902402	signal transduction involved in mitotic DNA damage checkpoint	13	986	62	16672	5.53e-05	0.0018518	0.0016392	ATM/AURKA/CCNB1/CDC25C/CNOT1/CNOT10/CNOT6/CNOT6L/EP300/MDM2/RBL2/TFDP1/TFDP2	13
GO:1902403	signal transduction involved in mitotic DNA integrity checkpoint	13	986	62	16672	5.53e-05	0.0018518	0.0016392	ATM/AURKA/CCNB1/CDC25C/CNOT1/CNOT10/CNOT6/CNOT6L/EP300/MDM2/RBL2/TFDP1/TFDP2	13
GO:1903050	regulation of proteolysis involved in cellular protein catabolic process	29	986	224	16672	5.93e-05	0.00197066	0.00174442	ANKIB1/ARIH1/AURKA/BTRC/BUB1B/CCNB1/CDC27/CLEC16A/GSK3B/MDM2/NFE2L2/PIAS1/PSMB1/PSMD1/PSME3/PSME4/PTEN/PTK2/RAD23B/RFWD2/RNF138/RNF217/SKP1/SMARCC1/TLK2/UBE2K/UBE3A/UBQLN1/USP14	29
GO:0051052	regulation of DNA metabolic process	40	986	355	16672	6.8e-05	0.00224328	0.00198574	ATM/ATRX/BMPR2/BRCA1/CCT2/CCT3/DEK/DNA2/DNMT1/ESCO1/EYA3/GSK3B/HNRNPC/INO80/KDM1A/KDM1B/MAP2K4/MAPK1/MSH3/NEK7/PDS5A/RAC1/RFC2/RLF/RNF169/SMC1A/SPIDR/STAG2/TCP1/TERF2/TFRC/TGFB1/TIPIN/TRIP12/UBR5/UHRF2/UIMC1/USP1/WHSC1/ZRANB3	40
GO:0018210	peptidyl-threonine modification	15	986	81	16672	7.01e-05	0.00229347	0.00203017	CLK1/DYRK1A/GALNT2/GSK3B/HIPK3/MAPK1/MAPK8/NLK/PRKCA/PRKCB/STK39/TGFB1/UBE2K/VRK1/WNK1	15
GO:0031647	regulation of protein stability	28	986	216	16672	7.73e-05	0.00250988	0.00222173	AURKA/BTRC/CCT2/CCT3/CDC73/COG3/DERL1/EP300/FBXO7/FLNA/GNAQ/MAPK1/MDM2/MORC3/NAPG/NLK/PDCD10/PTEN/RNF149/STK3/STK4/STXBP4/TCP1/TRIM24/USP3/USP33/USP4/ZNF207	28
GO:0072401	signal transduction involved in DNA integrity checkpoint	13	986	64	16672	7.84e-05	0.00251017	0.00222199	ATM/AURKA/CCNB1/CDC25C/CNOT1/CNOT10/CNOT6/CNOT6L/EP300/MDM2/RBL2/TFDP1/TFDP2	13
GO:0072422	signal transduction involved in DNA damage checkpoint	13	986	64	16672	7.84e-05	0.00251017	0.00222199	ATM/AURKA/CCNB1/CDC25C/CNOT1/CNOT10/CNOT6/CNOT6L/EP300/MDM2/RBL2/TFDP1/TFDP2	13
GO:0051656	establishment of organelle localization	44	986	407	16672	8.02e-05	0.0025509	0.00225805	ACTN4/ACTR2/ACTR3/ATM/BRAF/CANX/CCNB1/CDK5RAP2/CHMP5/CLASP1/CLASP2/DENND1A/DLG1/DLGAP5/DNAJC5/GOSR1/GPSM2/HIF1A/ITGA4/KIF14/KIF18A/KIF3B/NDE1/NUP88/NUSAP1/PDCD10/PPP6R3/PTK2/RAB27A/RAB5A/RAB6A/RABGEF1/RASGRP1/RHOT1/SCFD1/SEC24B/SEC31A/SPG11/TMED2/TRAPPC6B/TRAPPC9/USO1/WIPI1/XPO1	44
GO:0000722	telomere maintenance via recombination	9	986	33	16672	9.05e-05	0.00285805	0.00252993	DNA2/NSMCE2/POLA1/POLE2/PRIM1/RFC1/RFC2/RPA1/TERF2	9
GO:0072395	signal transduction involved in cell cycle checkpoint	13	986	65	16672	9.28e-05	0.00290737	0.00257359	ATM/AURKA/CCNB1/CDC25C/CNOT1/CNOT10/CNOT6/CNOT6L/EP300/MDM2/RBL2/TFDP1/TFDP2	13
GO:0007020	microtubule nucleation	7	986	20	16672	9.72e-05	0.0030244	0.00267718	CLASP1/CLASP2/NDE1/RANBP9/SLAIN2/TUBGCP3/TUBGCP4	7
GO:0016050	vesicle organization	37	986	325	16672	0.00010169	0.00314321	0.00278235	AGFG1/AKT2/AP1G1/ATP8A1/C2CD5/CHMP5/EEA1/EPS15/EVI5/GOSR1/LYST/PDCD6IP/PICALM/PPP6R3/RABGAP1L/SCFD1/SEC22A/SEC24B/SEC31A/SNX1/SNX5/SNX6/STAM/STX17/STX6/TBC1D12/TBC1D14/TBCK/TMED2/TRAPPC6B/TRAPPC9/USO1/USP6NL/VAMP3/VAPA/VAPB/VPS37A	37
GO:0009411	response to UV	19	986	123	16672	0.0001083	0.00332444	0.00294277	CREBBP/DDB1/DTL/EP300/ERCC6/INO80/KDM1A/MAP4K3/MAPK8/MDM2/PRIMPOL/RAD18/REV1/RHBDD1/SDF4/STK11/TIPIN/USP1/ZRANB3	19
GO:1901522	positive regulation of transcription from RNA polymerase II promoter involved in cellular response to chemical stimulus	8	986	27	16672	0.00011762	0.00358579	0.00317412	ATF6/CARF/CHD6/EP300/HIF1A/NCOA1/NFE2L2/SMAD4	8
GO:0031056	regulation of histone modification	19	986	124	16672	0.000120945	0.00366209	0.00324166	ATM/ATRX/BRCA1/CCNB1/DNMT1/EED/JARID2/KDM1A/KDM5A/MAPK8/NIPBL/NSD1/SIN3A/SMAD4/TADA2A/TGFB1/TRIP12/UBR5/ZNF451	19
GO:0000910	cytokinesis	20	986	135	16672	0.000130439	0.00392285	0.00347249	ACTR2/ACTR3/AHCTF1/APC/AURKA/BIRC6/CSPP1/ECT2/KIF14/KIF3B/MITD1/NEK7/NUSAP1/PIK3C3/PKN2/PRC1/ROCK2/SEPT6/TTC19/USP8	20
GO:0006999	nuclear pore organization	6	986	15	16672	0.00013282	0.00396768	0.00351216	AHCTF1/NUP107/NUP153/NUP35/NUP54/NUP98	6
GO:0010452	histone H3-K36 methylation	5	986	10	16672	0.000140543	0.00414275	0.00366714	ASH1L/NSD1/SETD2/SETD3/WHSC1	5
GO:0071044	histone mRNA catabolic process	5	986	10	16672	0.000140543	0.00414275	0.00366714	ATM/DCP2/EXOSC10/PAPD4/XRN1	5
GO:1903362	regulation of cellular protein catabolic process	30	986	247	16672	0.000144329	0.00422636	0.00374115	ANKIB1/ARIH1/AURKA/BTRC/BUB1B/CCNB1/CDC27/CLEC16A/GSK3B/MDM2/NFE2L2/PIAS1/PSMB1/PSMD1/PSME3/PSME4/PTEN/PTK2/RAD23B/RDX/RFWD2/RNF138/RNF217/SKP1/SMARCC1/TLK2/UBE2K/UBE3A/UBQLN1/USP14	30
GO:0018107	peptidyl-threonine phosphorylation	14	986	77	16672	0.000148723	0.00428318	0.00379145	CLK1/DYRK1A/GSK3B/HIPK3/MAPK1/MAPK8/NLK/PRKCA/PRKCB/STK39/TGFB1/UBE2K/VRK1/WNK1	14
GO:0031057	negative regulation of histone modification	9	986	35	16672	0.000148953	0.00428318	0.00379145	BRCA1/DNMT1/JARID2/KDM1A/KDM5A/SIN3A/TRIP12/UBR5/ZNF451	9
GO:0008380	RNA splicing	42	986	393	16672	0.000149156	0.00428318	0.00379145	AGGF1/CCAR1/CELF1/CLK1/CLNS1A/CPSF2/CSTF3/CWC27/DYRK1A/FIP1L1/GCFC2/HNRNPC/HNRNPD/HNRNPM/HNRNPUL1/KDM1A/KIAA1429/LUC7L3/MBNL1/METTL3/PABPN1/PAPOLA/PNN/PPIL3/PSPC1/PTBP3/QKI/RALY/RBM39/RBM41/RSRC1/SCAF8/SNRNP48/SRSF4/SYNCRIP/TRA2B/TSEN2/TXNL4B/USP4/USP49/ZBTB8OS/ZNF638	42
GO:0032434	regulation of proteasomal ubiquitin-dependent protein catabolic process	17	986	106	16672	0.000153887	0.0043907	0.00388663	ANKIB1/ARIH1/AURKA/CLEC16A/GSK3B/MDM2/NFE2L2/PIAS1/RAD23B/RFWD2/RNF138/RNF217/SMARCC1/TLK2/UBE2K/UBQLN1/USP14	17
GO:0006338	chromatin remodeling	22	986	158	16672	0.000156065	0.00442449	0.00391654	ACTR6/ANP32B/ATRX/BAZ1A/BPTF/CENPH/DEK/HIST1H4E/HNRNPC/INO80/ITGB3BP/PBRM1/PSME4/RERE/RSF1/SATB1/SMARCA5/SMARCC1/SMARCD1/SUV39H2/TADA2A/TOP1	22
GO:0009314	response to radiation	44	986	421	16672	0.00017364	0.0048916	0.00433002	ATM/BRAF/BRCA1/CAMKMT/CCDC66/CREBBP/DDB1/DMC1/DTL/ECT2/EP300/ERCC6/EYA3/FNTA/GNAQ/GNB1/HIF1A/INO80/KDM1A/LZIC/MAP4K3/MAPK8/MDM2/NIPBL/PAPD4/PIAS1/PRIMPOL/RAD18/REV1/RFWD2/RFWD3/RHBDD1/SDF4/SMC1A/SPIDR/STK11/TANK/TGFB1/TIPIN/TLK2/UIMC1/USP1/XRRA1/ZRANB3	44
GO:0046931	pore complex assembly	6	986	16	16672	0.000201908	0.00565214	0.00500324	AHCTF1/ANO6/CCT3/NUP107/NUP153/NUP98	6
GO:0006312	mitotic recombination	10	986	45	16672	0.000239264	0.00665603	0.00589188	DMC1/DNA2/NSMCE2/POLA1/POLE2/PRIM1/RFC1/RFC2/RPA1/TERF2	10
GO:0006606	protein import into nucleus	31	986	267	16672	0.000255013	0.00696357	0.00616411	CDH1/CEP57/CSE1L/ECT2/FAF1/FLNA/GNAQ/GSK3B/MAPK1/MED1/NUP107/NUP153/NUP35/NUP50/NUP54/NUP88/NUP98/PDIA3/PKD2/POM121/POM121C/PPM1B/RAB23/RANBP2/RERE/SMAD4/SPPL3/TGFB1/TNPO1/TNPO3/UBR5	31
GO:0044744	protein targeting to nucleus	31	986	267	16672	0.000255013	0.00696357	0.00616411	CDH1/CEP57/CSE1L/ECT2/FAF1/FLNA/GNAQ/GSK3B/MAPK1/MED1/NUP107/NUP153/NUP35/NUP50/NUP54/NUP88/NUP98/PDIA3/PKD2/POM121/POM121C/PPM1B/RAB23/RANBP2/RERE/SMAD4/SPPL3/TGFB1/TNPO1/TNPO3/UBR5	31
GO:1902593	single-organism nuclear import	31	986	267	16672	0.000255013	0.00696357	0.00616411	CDH1/CEP57/CSE1L/ECT2/FAF1/FLNA/GNAQ/GSK3B/MAPK1/MED1/NUP107/NUP153/NUP35/NUP50/NUP54/NUP88/NUP98/PDIA3/PKD2/POM121/POM121C/PPM1B/RAB23/RANBP2/RERE/SMAD4/SPPL3/TGFB1/TNPO1/TNPO3/UBR5	31
GO:0006301	postreplication repair	11	986	54	16672	0.000267837	0.00726915	0.00643461	BRCA1/DTL/POLE2/PRIMPOL/RAD18/REV1/RFC1/RFC2/RPA1/TRIM25/UBE2F	11
GO:0070507	regulation of microtubule cytoskeleton organization	17	986	112	16672	0.00030355	0.00814857	0.00721307	APC/AURKA/BRCA1/CDK5RAP2/CHMP5/CLASP1/CLASP2/HDGFRP3/KIF18A/PDCD6IP/ROCK2/SENP6/SKA3/SLAIN2/STIL/TBCD/XPO1	17
GO:0016236	macroautophagy	28	986	234	16672	0.000303901	0.00814857	0.00721307	ATG3/ATG5/ATP6V0A1/C6orf106/CLEC16A/EXOC7/HIF1A/LARP1/MAPK8/MTMR3/PIK3C2B/PIK3C3/PIP4K2A/RAB12/RAB23/RAB5A/RB1CC1/RHEB/SCFD1/SNX5/SNX6/STX17/TBC1D12/TBC1D14/TRAPPC8/UBQLN1/VPS13C/WIPI1	28
GO:0000731	DNA synthesis involved in DNA repair	13	986	73	16672	0.000314347	0.0083782	0.00741633	ATM/BARD1/BRCA1/BRIP1/DNA2/DTL/POLE2/PRIMPOL/REV1/RFC1/RFC2/RPA1/TRIM25	13
GO:0006891	intra-Golgi vesicle-mediated transport	10	986	47	16672	0.000348772	0.00924038	0.00817953	COG2/COG3/COPA/CUX1/GOLGA1/GOSR1/NAPG/RAB6A/RGPD4/RGPD5	10
GO:0008334	histone mRNA metabolic process	7	986	24	16672	0.000352224	0.00927661	0.00821161	ATM/CPSF2/DCP2/EXOSC10/PAPD4/SLBP/XRN1	7
GO:1903322	positive regulation of protein modification by small protein conjugation or removal	24	986	190	16672	0.000361034	0.00940117	0.00832186	BIRC2/BRCA1/BTRC/BUB1B/CCNB1/CDC27/DCUN1D4/DERL1/FANCI/KDM1A/PIAS1/PSMB1/PSMD1/PSME3/PSME4/PTEN/PTK2/PTPN22/SKP1/TANK/UBE2I/UBE2L3/UBE3A/UBQLN1	24
GO:0016574	histone ubiquitination	9	986	39	16672	0.000361177	0.00940117	0.00832186	CDC73/DDB1/HUWE1/KDM1A/SKP1/SUZ12/TRIP12/UBR2/UBR5	9
GO:0032886	regulation of microtubule-based process	19	986	135	16672	0.000372657	0.00964358	0.00853644	APC/AURKA/BRCA1/CDK5RAP2/CHMP5/CLASP1/CLASP2/GSK3B/HDGFRP3/KIF18A/MEMO1/PDCD6IP/ROCK2/SENP6/SKA3/SLAIN2/STIL/TBCD/XPO1	19
GO:1903052	positive regulation of proteolysis involved in cellular protein catabolic process	22	986	168	16672	0.000377972	0.00972458	0.00860814	ANKIB1/ARIH1/AURKA/BTRC/BUB1B/CCNB1/CDC27/GSK3B/MDM2/NFE2L2/PIAS1/PSMB1/PSMD1/PSME3/PSME4/PTEN/PTK2/RFWD2/RNF138/RNF217/SKP1/UBQLN1	22
GO:0032259	methylation	36	986	335	16672	0.00038849	0.00993776	0.00879685	AHCY/ASH1L/ASH2L/ATRX/BRCA1/CAMKMT/DNMT1/DOT1L/EED/EZH1/EZH2/GSK3B/JARID2/KDM1A/KDM1B/KIAA1429/KMT2C/KMT2E/LCMT1/METTL3/METTL8/NSD1/NSUN2/PCMT1/PCMTD1/PRDM2/RAB6A/RLF/SATB1/SETD2/SETD3/SMAD4/SUV39H2/SUZ12/WHSC1/WHSC1L1	36
GO:0031124	mRNA 3'-end processing	14	986	85	16672	0.000433351	0.011022	0.00975659	BARD1/CCNB1/CDC73/CPSF2/CPSF6/CSTF3/FIP1L1/PABPN1/PAPOLA/PAPOLG/SLBP/SRSF4/SYMPK/ZC3H11A	14
GO:0015758	glucose transport	20	986	148	16672	0.000454482	0.0114937	0.0101742	ADIPOR2/AKT2/BRAF/C2CD5/LMBRD1/NFE2L2/NUP107/NUP153/NUP35/NUP50/NUP54/NUP88/NUP98/NUPL2/POM121/POM121C/PRKCB/PTPN11/RANBP2/STXBP4	20
GO:1903364	positive regulation of cellular protein catabolic process	23	986	182	16672	0.000471303	0.0118518	0.0104912	ANKIB1/ARIH1/AURKA/BTRC/BUB1B/CCNB1/CDC27/GSK3B/MDM2/NFE2L2/PIAS1/PSMB1/PSMD1/PSME3/PSME4/PTEN/PTK2/RDX/RFWD2/RNF138/RNF217/SKP1/UBQLN1	23
GO:0031929	TOR signaling	14	986	86	16672	0.000489971	0.0121858	0.0107868	ATM/DEPDC5/FBXO9/FNIP1/HIF1A/LARP1/MAPKAP1/PRR5L/RHEB/RICTOR/STK11/UBR1/UBR2/WDR59	14
GO:0009894	regulation of catabolic process	48	986	494	16672	0.00049006	0.0121858	0.0107868	AGO2/AKT2/ANKIB1/APC/ARIH1/AURKA/AZIN1/BANP/BARD1/BTRC/BUB1B/CCNB1/CDC27/CLEC16A/CNOT1/FAF1/FLNA/GSK3B/HIF1A/MDM2/NBAS/NFE2L2/PDE3B/PIAS1/PRR5L/PSMB1/PSMD1/PSME3/PSME4/PTEN/PTK2/RAD23B/RDX/RFWD2/RNF138/RNF217/SKP1/SMARCC1/SNX1/TLK2/UBAC2/UBE2K/UBE3A/UBQLN1/UBXN2A/USP14/USP25/XPO1	48
GO:0046785	microtubule polymerization	10	986	49	16672	0.000497163	0.0122937	0.0108824	CLASP1/CLASP2/HDGFRP3/NDE1/RANBP9/SLAIN2/TBCD/TUBGCP3/TUBGCP4/ZNF207	10
GO:0044786	cell cycle DNA replication	8	986	33	16672	0.000536024	0.0129635	0.0114752	ATRX/DNA2/INO80/SLBP/SMC1A/STAG2/TERF2/TIPIN	8
GO:0046825	regulation of protein export from nucleus	8	986	33	16672	0.000536024	0.0129635	0.0114752	ANP32B/BARD1/GSK3B/MDM2/PTPN11/SP100/XPO1/XPO5	8
GO:1901796	regulation of signal transduction by p53 class mediator	21	986	161	16672	0.000536048	0.0129635	0.0114752	ATM/AURKA/BANP/BARD1/BRCA1/BRIP1/CD44/DNA2/DYRK1A/EP300/KDM1A/MDM2/PHF20/RFC2/RPA1/STK11/SUPT16H/TAF12/TP53BP2/TPX2/TRIM24	21
GO:0031109	microtubule polymerization or depolymerization	13	986	77	16672	0.000538028	0.0129635	0.0114752	APC/CLASP1/CLASP2/HDGFRP3/KIF18A/NDE1/RANBP9/SKA3/SLAIN2/TBCD/TUBGCP3/TUBGCP4/ZNF207	13
GO:0008645	hexose transport	20	986	150	16672	0.000541724	0.0129635	0.0114752	ADIPOR2/AKT2/BRAF/C2CD5/LMBRD1/NFE2L2/NUP107/NUP153/NUP35/NUP50/NUP54/NUP88/NUP98/NUPL2/POM121/POM121C/PRKCB/PTPN11/RANBP2/STXBP4	20
GO:0015749	monosaccharide transport	20	986	150	16672	0.000541724	0.0129635	0.0114752	ADIPOR2/AKT2/BRAF/C2CD5/LMBRD1/NFE2L2/NUP107/NUP153/NUP35/NUP50/NUP54/NUP88/NUP98/NUPL2/POM121/POM121C/PRKCB/PTPN11/RANBP2/STXBP4	20
GO:0006895	Golgi to endosome transport	6	986	19	16672	0.000586914	0.0138711	0.0122786	DOPEY2/EPS15/KIF16B/MON2/VPS13C/WIPI1	6
GO:0031935	regulation of chromatin silencing	6	986	19	16672	0.000586914	0.0138711	0.0122786	ATAD2/ATAD2B/DNMT1/PHF8/SIN3A/UHRF2	6
GO:0090307	mitotic spindle assembly	10	986	50	16672	0.000588999	0.0138711	0.0122786	CDC14A/CHMP5/CLASP1/FLNA/KIF3B/MYBL2/TPX2/TUBGCP3/TUBGCP4/ZNF207	10
GO:0016441	posttranscriptional gene silencing	11	986	59	16672	0.000597584	0.0139259	0.0123271	AGO2/CELF1/CNOT1/CNOT6/DROSHA/FXR1/METTL3/SMAD2/TGFB1/TNRC6A/XPO5	11
GO:0035194	posttranscriptional gene silencing by RNA	11	986	59	16672	0.000597584	0.0139259	0.0123271	AGO2/CELF1/CNOT1/CNOT6/DROSHA/FXR1/METTL3/SMAD2/TGFB1/TNRC6A/XPO5	11
GO:0036503	ERAD pathway	14	986	88	16672	0.000622265	0.0144255	0.0127694	CCDC47/DERL1/NFE2L2/POMT1/RHBDD1/STT3B/TRIM25/UBAC2/UBQLN1/UBXN4/UGGT1/UGGT2/USP14/USP25	14
GO:0010212	response to ionizing radiation	19	986	141	16672	0.000646732	0.014915	0.0132027	ATM/BRCA1/DMC1/ECT2/ERCC6/EYA3/INO80/KDM1A/LZIC/NIPBL/RFWD2/RFWD3/SPIDR/STK11/TANK/TGFB1/TLK2/UIMC1/XRRA1	19
GO:0000288	nuclear-transcribed mRNA catabolic process, deadenylation-dependent decay	12	986	69	16672	0.000661235	0.0151709	0.0134292	AGO2/CNOT1/CNOT10/CNOT6/CNOT6L/DCP2/DDX6/EIF4A2/EXOSC1/PAN3/PARN/PATL1	12
GO:0000289	nuclear-transcribed mRNA poly(A) tail shortening	8	986	34	16672	0.00066504	0.01518	0.0134372	AGO2/CNOT1/CNOT10/CNOT6/CNOT6L/EIF4A2/PAN3/PARN	8
GO:0007030	Golgi organization	15	986	99	16672	0.000686164	0.0155822	0.0137933	CLASP1/CLASP2/COG2/COG3/DYM/MAPK1/PDCD10/STX17/STX6/TMED2/UBXN2A/USO1/USP6NL/VMP1/VRK1	15
GO:1902850	microtubule cytoskeleton organization involved in mitosis	10	986	51	16672	0.000694418	0.0156896	0.0138884	CDC14A/CHMP5/CLASP1/FLNA/KIF3B/MYBL2/TPX2/TUBGCP3/TUBGCP4/ZNF207	10
GO:0009408	response to heat	20	986	153	16672	0.000699697	0.015729	0.0139233	ATM/CREBBP/DNAJB6/EP300/GSK3B/MAPK1/NUP107/NUP153/NUP35/NUP50/NUP54/NUP88/NUP98/NUPL2/POM121/POM121C/PTGES3/RANBP2/RPA1/YWHAE	20
GO:0006302	double-strand break repair	24	986	199	16672	0.000710188	0.0158846	0.014061	ATM/BACH1/BARD1/BRCA1/BRIP1/DEK/DMC1/DNA2/EYA3/HIST1H4E/INO80/KDM1A/MND1/NSMCE2/POLA1/RNF138/RNF169/RPA1/SMARCA5/SPIDR/TRIP12/UBR5/UIMC1/WHSC1	24
GO:0033044	regulation of chromosome organization	18	986	132	16672	0.000770272	0.0170589	0.0151004	APC/ATM/ATRX/BUB1B/CCNB1/CCT2/CCT3/CDC27/DLGAP5/HNRNPC/LCMT1/MAPK1/NEK7/NSMCE2/SENP6/TCP1/TERF2/ZNF207	18
GO:0061136	regulation of proteasomal protein catabolic process	19	986	143	16672	0.000770351	0.0170589	0.0151004	ANKIB1/ARIH1/AURKA/BTRC/CLEC16A/GSK3B/MDM2/NFE2L2/PIAS1/PSME3/RAD23B/RFWD2/RNF138/RNF217/SMARCC1/TLK2/UBE2K/UBQLN1/USP14	19
GO:0051170	nuclear import	31	986	285	16672	0.000783238	0.0172584	0.015277	CDH1/CEP57/CSE1L/ECT2/FAF1/FLNA/GNAQ/GSK3B/MAPK1/MED1/NUP107/NUP153/NUP35/NUP50/NUP54/NUP88/NUP98/PDIA3/PKD2/POM121/POM121C/PPM1B/RAB23/RANBP2/RERE/SMAD4/SPPL3/TGFB1/TNPO1/TNPO3/UBR5	31
GO:0031123	RNA 3'-end processing	16	986	111	16672	0.000807913	0.0176734	0.0156444	BARD1/CCNB1/CDC73/CPSF2/CPSF6/CSTF3/FIP1L1/PABPN1/PAPOLA/PAPOLG/SLBP/SRSF4/SYMPK/TRNT1/ZC3H11A/ZCCHC6	16
GO:0010506	regulation of autophagy	29	986	261	16672	0.000814053	0.0176734	0.0156444	ATM/ATP6V0A1/CLEC16A/DEPDC5/EP300/EXOC7/FBXO7/HERC1/HIF1A/LARP1/LEPR/MAPK8/MTDH/MTMR3/PIP4K2A/PSAP/PTPN22/RAB12/RAB5A/SCFD1/SNX5/SNX6/STK11/TBC1D12/TBC1D14/TLK2/USP33/VMP1/VPS13C	29
GO:0051568	histone H3-K4 methylation	10	986	52	16672	0.00081491	0.0176734	0.0156444	ASH1L/ASH2L/BRCA1/DNMT1/KDM1A/KMT2C/KMT2E/RLF/SETD3/SMAD4	10
GO:0090503	RNA phosphodiester bond hydrolysis, exonucleolytic	8	986	35	16672	0.000817955	0.0176734	0.0156444	CNOT1/CNOT6/CNOT6L/DCP2/EXOSC10/PAN3/PARN/XRN2	8
GO:0007088	regulation of mitotic nuclear division	18	986	133	16672	0.000842749	0.0181211	0.0160407	APC/ATM/ATRX/AURKA/BUB1B/CCNB1/CDC14A/CDC25C/CDC27/CHMP5/DLGAP5/KNTC1/LCMT1/NSMCE2/NUSAP1/PHIP/TGFB1/ZNF207	18
GO:0033047	regulation of mitotic sister chromatid segregation	10	986	53	16672	0.000952065	0.0203733	0.0180343	APC/ATM/ATRX/BUB1B/CCNB1/CDC27/DLGAP5/LCMT1/NSMCE2/ZNF207	10
GO:0006896	Golgi to vacuole transport	7	986	28	16672	0.000979135	0.020753	0.0183704	AP1G1/DOPEY2/EPS15/KIF16B/MON2/VPS13C/WIPI1	7
GO:0016577	histone demethylation	7	986	28	16672	0.000979135	0.020753	0.0183704	KDM1A/KDM1B/KDM4B/KDM4C/KDM5A/KDM7A/PHF8	7
GO:0034446	substrate adhesion-dependent cell spreading	13	986	82	16672	0.000994385	0.020852	0.0184581	ACTN4/BRAF/CORO1C/DOCK5/FAM21C/FLNA/ITGA4/KIF14/PEAK1/PTK2/RAC1/RREB1/VAMP3	13
GO:0031572	G2 DNA damage checkpoint	8	986	36	16672	0.000997862	0.020852	0.0184581	ATM/BRCA1/CLSPN/DTL/FANCI/TAOK1/TAOK3/UIMC1	8
GO:0042769	DNA damage response, detection of DNA damage	8	986	36	16672	0.000997862	0.020852	0.0184581	DDB1/DTL/MRPS35/RAD18/RFC1/RFC2/RPA1/USP1	8
GO:1903320	regulation of protein modification by small protein conjugation or removal	29	986	266	16672	0.00109846	0.022847	0.0202241	BIRC2/BRCA1/BTRC/BUB1B/CCNB1/CDC27/DCUN1D4/DERL1/FANCI/ITCH/KDM1A/PIAS1/PSMB1/PSMD1/PSME3/PSME4/PTEN/PTK2/PTPN22/SKP1/TANK/TRIP12/UBE2I/UBE2L3/UBE3A/UBQLN1/UBR5/UBXN2A/USP4	29
GO:0032092	positive regulation of protein binding	12	986	73	16672	0.00111011	0.0228755	0.0202492	CAPRIN2/CRBN/DERL1/EP300/EPB41/GSK3B/KRIT1/RAPGEF2/SPPL3/STK3/STK4/USP33	12
GO:0042147	retrograde transport, endosome to Golgi	12	986	73	16672	0.00111011	0.0228755	0.0202492	EVI5/FAM21C/GOSR1/RAB6A/RHOBTB3/SNX1/SNX5/SNX6/SPAG9/STX6/TBC1D14/VAMP3	12
GO:0035195	gene silencing by miRNA	10	986	55	16672	0.00128322	0.0261919	0.0231849	AGO2/CNOT1/CNOT6/DROSHA/FXR1/METTL3/SMAD2/TGFB1/TNRC6A/XPO5	10
GO:0007091	metaphase/anaphase transition of mitotic cell cycle	9	986	46	16672	0.00129459	0.0261919	0.0231849	APC/ATM/BUB1B/CCNB1/CDC27/DLGAP5/LCMT1/NSMCE2/ZNF207	9
GO:0010965	regulation of mitotic sister chromatid separation	9	986	46	16672	0.00129459	0.0261919	0.0231849	APC/ATM/BUB1B/CCNB1/CDC27/DLGAP5/LCMT1/NSMCE2/ZNF207	9
GO:1900024	regulation of substrate adhesion-dependent cell spreading	9	986	46	16672	0.00129459	0.0261919	0.0231849	ACTN4/BRAF/CORO1C/DOCK5/FAM21C/FLNA/PTK2/RAC1/RREB1	9
GO:0034599	cellular response to oxidative stress	25	986	220	16672	0.00131841	0.0265161	0.0234719	ATP7A/CHD6/ECT2/ETS1/EZH2/FBXO7/FOXO3/FUT8/HIF1A/HNRNPD/MAP3K5/MDM2/MELK/NFE2L2/PDCD10/PDK1/PKD2/PRR5L/PSAP/SIN3A/SOD2/STAU1/UBQLN1/VRK2/ZNF277	25
GO:0046822	regulation of nucleocytoplasmic transport	24	986	208	16672	0.00132253	0.0265161	0.0234719	ANP32B/BARD1/CDH1/ECT2/FAF1/FLNA/GNAQ/GSK3B/MDM2/MED1/NUP153/NUP54/PKD2/PPM1B/PTPN11/RAB23/SETD2/SMAD4/SP100/SPPL3/TGFB1/UBR5/XPO1/XPO5	24
GO:0000377	RNA splicing, via transesterification reactions with bulged adenosine as nucleophile	31	986	295	16672	0.00137571	0.0272878	0.024155	CCAR1/CELF1/CLNS1A/CPSF2/CSTF3/CWC27/DYRK1A/FIP1L1/GCFC2/HNRNPC/HNRNPD/HNRNPM/HNRNPUL1/KDM1A/LUC7L3/METTL3/PABPN1/PAPOLA/PNN/PPIL3/PSPC1/RALY/RBM41/RSRC1/SNRNP48/SRSF4/SYNCRIP/TRA2B/TXNL4B/USP4/USP49	31
GO:0000398	mRNA splicing, via spliceosome	31	986	295	16672	0.00137571	0.0272878	0.024155	CCAR1/CELF1/CLNS1A/CPSF2/CSTF3/CWC27/DYRK1A/FIP1L1/GCFC2/HNRNPC/HNRNPD/HNRNPM/HNRNPUL1/KDM1A/LUC7L3/METTL3/PABPN1/PAPOLA/PNN/PPIL3/PSPC1/RALY/RBM41/RSRC1/SNRNP48/SRSF4/SYNCRIP/TRA2B/TXNL4B/USP4/USP49	31
GO:0016578	histone deubiquitination	6	986	22	16672	0.00138554	0.0272878	0.024155	ASXL1/TRRAP/UIMC1/USP15/USP3/USP49	6
GO:0046621	negative regulation of organ growth	6	986	22	16672	0.00138554	0.0272878	0.024155	CTDP1/PTEN/PTK2/STK3/STK4/WWC3	6
GO:0036294	cellular response to decreased oxygen levels	18	986	139	16672	0.00141187	0.0276839	0.0245056	BACH1/CCNB1/CPEB1/CPEB4/CREBBP/CUL2/EP300/FOXO3/GNB1/HIF1A/HP1BP3/MDM2/NFE2L2/PDK1/PTEN/SUV39H2/UBE2D2/UBQLN1	18
GO:0050821	protein stabilization	17	986	128	16672	0.00143234	0.027962	0.0247518	CCT2/CCT3/COG3/EP300/FLNA/GNAQ/MORC3/NAPG/NLK/PDCD10/PTEN/STK3/STK4/STXBP4/TCP1/USP33/ZNF207	17
GO:0061647	histone H3-K9 modification	8	986	38	16672	0.00145207	0.0282235	0.0249833	ATRX/BRCA1/DNMT1/JARID2/KDM1A/SMAD4/SUV39H2/ZNF451	8
GO:0006482	protein demethylation	7	986	30	16672	0.00151804	0.0290098	0.0256793	KDM1A/KDM1B/KDM4B/KDM4C/KDM5A/KDM7A/PHF8	7
GO:0008214	protein dealkylation	7	986	30	16672	0.00151804	0.0290098	0.0256793	KDM1A/KDM1B/KDM4B/KDM4C/KDM5A/KDM7A/PHF8	7
GO:0021695	cerebellar cortex development	9	986	47	16672	0.0015186	0.0290098	0.0256793	AGTPBP1/ARCN1/ATP7A/EZH2/HERC1/KIF14/OGDH/PTPN11/RERE	9
GO:0044784	metaphase/anaphase transition of cell cycle	9	986	47	16672	0.0015186	0.0290098	0.0256793	APC/ATM/BUB1B/CCNB1/CDC27/DLGAP5/LCMT1/NSMCE2/ZNF207	9
GO:0031398	positive regulation of protein ubiquitination	21	986	175	16672	0.00158344	0.0300648	0.0266132	BIRC2/BRCA1/BTRC/BUB1B/CCNB1/CDC27/DCUN1D4/DERL1/FANCI/KDM1A/PSMB1/PSMD1/PSME3/PSME4/PTEN/PTK2/PTPN22/SKP1/UBE2L3/UBE3A/UBQLN1	21
GO:0036293	response to decreased oxygen levels	30	986	285	16672	0.00158733	0.0300648	0.0266132	ACTN4/ADAM17/AHCY/ATM/BACH1/BIRC2/CCNB1/CPEB1/CPEB4/CREBBP/CUL2/EP300/ETS1/FOXO3/FUNDC1/GNB1/HIF1A/HP1BP3/MDM2/NFE2L2/PDK1/PLOD2/PRKCB/PTEN/SCFD1/SMAD4/SUV39H2/TGFB1/UBE2D2/UBQLN1	30
GO:0008643	carbohydrate transport	22	986	187	16672	0.00160532	0.0302766	0.0268007	ADIPOR2/AKT2/BRAF/C2CD5/LMBRD1/NFE2L2/NUP107/NUP153/NUP35/NUP50/NUP54/NUP88/NUP98/NUPL2/POM121/POM121C/PRKCB/PTPN11/RANBP2/SLC35D2/SLC45A4/STXBP4	22
GO:0007050	cell cycle arrest	26	986	236	16672	0.00166952	0.0313545	0.0277548	AKT2/APC/ATM/AURKA/BARD1/BRCA1/CCNB1/CDC14A/CDC25C/CNOT1/CNOT10/CNOT6/CNOT6L/CUL2/EP300/KMT2E/MDM2/PKD2/PPP2R3B/RBL2/RHEB/STK11/TFDP1/TFDP2/TGFB1/UHRF2	26
GO:0000375	RNA splicing, via transesterification reactions	31	986	299	16672	0.00170441	0.0318753	0.0282158	CCAR1/CELF1/CLNS1A/CPSF2/CSTF3/CWC27/DYRK1A/FIP1L1/GCFC2/HNRNPC/HNRNPD/HNRNPM/HNRNPUL1/KDM1A/LUC7L3/METTL3/PABPN1/PAPOLA/PNN/PPIL3/PSPC1/RALY/RBM41/RSRC1/SNRNP48/SRSF4/SYNCRIP/TRA2B/TXNL4B/USP4/USP49	31
GO:0051306	mitotic sister chromatid separation	9	986	48	16672	0.0017727	0.0325952	0.0288531	APC/ATM/BUB1B/CCNB1/CDC27/DLGAP5/LCMT1/NSMCE2/ZNF207	9
GO:0006515	misfolded or incompletely synthesized protein catabolic process	6	986	23	16672	0.0017818	0.0325952	0.0288531	DERL1/OMA1/POMT1/UGGT1/UGGT2/YME1L1	6
GO:0007064	mitotic sister chromatid cohesion	6	986	23	16672	0.0017818	0.0325952	0.0288531	ATRX/NIPBL/NSMCE2/PDS5A/PDS5B/SMC1A	6
GO:0036473	cell death in response to oxidative stress	11	986	67	16672	0.00178307	0.0325952	0.0288531	FBXO7/FOXO3/HIF1A/MAP3K5/MELK/NFE2L2/PDCD10/PDK1/PSAP/SOD2/UBQLN1	11
GO:0006282	regulation of DNA repair	12	986	77	16672	0.00178684	0.0325952	0.0288531	BRCA1/DEK/EYA3/KDM1A/RNF169/SPIDR/TERF2/TRIP12/UBR5/UIMC1/USP1/WHSC1	12
GO:0006903	vesicle targeting	12	986	77	16672	0.00178684	0.0325952	0.0288531	CLASP1/CLASP2/GOSR1/PPP6R3/SCFD1/SEC24B/SEC31A/TMED2/TRAPPC6B/TRAPPC9/USO1/WIPI1	12
GO:2000104	negative regulation of DNA-dependent DNA replication	5	986	16	16672	0.0018077	0.0328412	0.0290708	SMC1A/STAG2/TERF2/TIPIN/ZRANB3	5
GO:0045814	negative regulation of gene expression, epigenetic	17	986	131	16672	0.00184807	0.033438	0.0295991	AEBP2/ATAD2/ATAD2B/DNMT1/DOT1L/EED/EZH2/HAT1/HIST1H4E/JARID2/PHF8/SIN3A/SIRT5/SMARCA5/SUZ12/UBR2/UHRF2	17
GO:0051292	nuclear pore complex assembly	4	986	10	16672	0.00191487	0.0345065	0.0305449	AHCTF1/NUP107/NUP153/NUP98	4
GO:0007623	circadian rhythm	22	986	190	16672	0.00196821	0.0353247	0.0312692	AHCY/BTRC/DYRK1A/EP300/EZH2/GFPT1/GNAQ/GSK3B/HNRNPD/KDM5A/MAPK8/MAPK9/METTL3/NCOA2/NRIP1/PSPC1/PTEN/ROCK2/SIN3A/SUV39H2/TOP1/UBE3A	22
GO:0051983	regulation of chromosome segregation	12	986	78	16672	0.00200057	0.0357613	0.0316557	APC/ATM/ATRX/BUB1B/CCNB1/CDC27/DLGAP5/ECT2/LCMT1/NSMCE2/RAD18/ZNF207	12
GO:0035335	peptidyl-tyrosine dephosphorylation	14	986	99	16672	0.00201403	0.0358578	0.0317411	CDC14A/CDC25C/DNAJC6/EYA3/MTMR1/MTMR3/PTEN/PTP4A2/PTPN11/PTPN12/PTPN22/PTPN4/PTPRA/SSH2	14
GO:0001666	response to hypoxia	29	986	277	16672	0.00204237	0.0362175	0.0320595	ACTN4/ADAM17/AHCY/ATM/BACH1/BIRC2/CCNB1/CPEB1/CREBBP/CUL2/EP300/ETS1/FOXO3/FUNDC1/GNB1/HIF1A/HP1BP3/MDM2/NFE2L2/PDK1/PLOD2/PRKCB/PTEN/SCFD1/SMAD4/SUV39H2/TGFB1/UBE2D2/UBQLN1	29
GO:0043631	RNA polyadenylation	8	986	40	16672	0.00205653	0.0363238	0.0321536	CDC73/CPSF2/CPSF6/CSTF3/PAPD4/PAPOLA/PAPOLG/SYMPK	8
GO:0031331	positive regulation of cellular catabolic process	28	986	265	16672	0.00211357	0.0370495	0.032796	AGO2/AKT2/ANKIB1/ARIH1/AURKA/BTRC/BUB1B/CCNB1/CDC27/CNOT1/GSK3B/HIF1A/MDM2/NFE2L2/PIAS1/PRR5L/PSMB1/PSMD1/PSME3/PSME4/PTEN/PTK2/RDX/RFWD2/RNF138/RNF217/SKP1/UBQLN1	28
GO:0017038	protein import	32	986	316	16672	0.00211426	0.0370495	0.032796	CDH1/CEP57/CSE1L/ECT2/FAF1/FLNA/GNAQ/GSK3B/MAPK1/MED1/NUP107/NUP153/NUP35/NUP50/NUP54/NUP88/NUP98/PDIA3/PKD2/POM121/POM121C/PPM1B/RAB23/RANBP2/RERE/SMAD4/SPPL3/TGFB1/TIMM23B/TNPO1/TNPO3/UBR5	32
GO:0071456	cellular response to hypoxia	17	986	133	16672	0.00217807	0.0380181	0.0336534	BACH1/CCNB1/CPEB1/CREBBP/CUL2/EP300/FOXO3/GNB1/HIF1A/HP1BP3/MDM2/NFE2L2/PDK1/PTEN/SUV39H2/UBE2D2/UBQLN1	17
GO:0034329	cell junction assembly	22	986	192	16672	0.00224705	0.0387518	0.0343029	ACTN4/APC/CLASP1/CLASP2/CORO1C/CTNNA1/DLG1/ECT2/FLNA/MTDH/PKN2/PLEC/PRKCA/PTEN/PTK2/RAC1/RAPGEF2/ROCK2/SLK/TBCD/TLN2/VMP1	22
GO:0000301	retrograde transport, vesicle recycling within Golgi	6	986	24	16672	0.00225832	0.0387518	0.0343029	COG3/CUX1/GOLGA1/RAB6A/RGPD4/RGPD5	6
GO:0033260	nuclear DNA replication	6	986	24	16672	0.00225832	0.0387518	0.0343029	ATRX/DNA2/INO80/SLBP/TERF2/TIPIN	6
GO:0033048	negative regulation of mitotic sister chromatid segregation	7	986	32	16672	0.00226364	0.0387518	0.0343029	APC/ATM/ATRX/BUB1B/CCNB1/LCMT1/ZNF207	7
GO:0045070	positive regulation of viral genome replication	7	986	32	16672	0.00226364	0.0387518	0.0343029	DDB1/LARP1/PKN2/STAU1/VAPA/VAPB/YTHDC2	7
GO:0031329	regulation of cellular catabolic process	36	986	370	16672	0.0023092	0.0393803	0.0348592	AGO2/AKT2/ANKIB1/ARIH1/AURKA/BTRC/BUB1B/CCNB1/CDC27/CLEC16A/CNOT1/GSK3B/HIF1A/MDM2/NBAS/NFE2L2/PIAS1/PRR5L/PSMB1/PSMD1/PSME3/PSME4/PTEN/PTK2/RAD23B/RDX/RFWD2/RNF138/RNF217/SKP1/SMARCC1/TLK2/UBE2K/UBE3A/UBQLN1/USP14	36
GO:0016241	regulation of macroautophagy	16	986	123	16672	0.00242112	0.0410396	0.036328	ATP6V0A1/CLEC16A/EXOC7/HIF1A/LARP1/MAPK8/MTMR3/PIP4K2A/RAB12/RAB5A/SCFD1/SNX5/SNX6/TBC1D12/TBC1D14/VPS13C	16
GO:0019985	translesion synthesis	8	986	41	16672	0.00242494	0.0410396	0.036328	DTL/POLE2/PRIMPOL/REV1/RFC1/RFC2/RPA1/TRIM25	8
GO:0016573	histone acetylation	18	986	146	16672	0.00245843	0.0414488	0.0366903	ATF2/BRCA1/CDYL/CREBBP/ELP3/EP300/HAT1/KANSL1/NCOA1/NCOA2/PHF20/SIN3A/SMAD4/TADA2A/TGFB1/TRRAP/YEATS4/ZNF451	18
GO:0006890	retrograde vesicle-mediated transport, Golgi to ER	12	986	80	16672	0.00249092	0.0418381	0.0370348	ARCN1/ATP9B/COG3/COPA/KIF15/KIF18A/KIF3B/NBAS/PITPNB/RAB6A/SCFD1/TMED2	12
GO:0006892	post-Golgi vesicle-mediated transport	10	986	60	16672	0.00253312	0.0423869	0.0375207	AP1G1/C16orf62/DOPEY2/EPS15/EXOC2/KIF16B/MON2/SCFD1/VPS13C/WIPI1	10
GO:0032436	positive regulation of proteasomal ubiquitin-dependent protein catabolic process	11	986	70	16672	0.0025556	0.0426029	0.0377119	ANKIB1/ARIH1/AURKA/GSK3B/MDM2/NFE2L2/PIAS1/RFWD2/RNF138/RNF217/UBQLN1	11
GO:0071897	DNA biosynthetic process	22	986	195	16672	0.00272766	0.0453015	0.0401006	ATM/BARD1/BMPR2/BRCA1/BRIP1/CCT2/CCT3/DNA2/DTL/HNRNPC/MAPK1/NEK7/POLE2/PRIMPOL/PTGES3/REV1/RFC1/RFC2/RPA1/TCP1/TERF2/TRIM25	22
GO:1903391	regulation of adherens junction organization	9	986	51	16672	0.00274426	0.0454079	0.0401948	CLASP1/CLASP2/CORO1C/PTEN/PTK2/RAC1/RDX/ROCK2/SLK	9
GO:0070076	histone lysine demethylation	6	986	25	16672	0.00282481	0.045829	0.0405676	KDM1A/KDM1B/KDM4C/KDM5A/KDM7A/PHF8	6
GO:0046605	regulation of centrosome cycle	8	986	42	16672	0.00284308	0.045829	0.0405676	AURKA/BRCA1/CDK5RAP2/CHMP5/PDCD6IP/ROCK2/STIL/XPO1	8
GO:0090329	regulation of DNA-dependent DNA replication	8	986	42	16672	0.00284308	0.045829	0.0405676	ATRX/INO80/RFC2/SMC1A/STAG2/TERF2/TIPIN/ZRANB3	8
GO:0071453	cellular response to oxygen levels	18	986	148	16672	0.00285568	0.045829	0.0405676	BACH1/CCNB1/CPEB1/CPEB4/CREBBP/CUL2/EP300/FOXO3/GNB1/HIF1A/HP1BP3/MDM2/NFE2L2/PDK1/PTEN/SUV39H2/UBE2D2/UBQLN1	18
GO:0021766	hippocampus development	11	986	71	16672	0.00286617	0.045829	0.0405676	EZH1/EZH2/GSK3B/KIF14/NCOA1/OGDH/PAPD4/PHLPP2/PTEN/XRN2/YWHAE	11
GO:0033169	histone H3-K9 demethylation	4	986	11	16672	0.00286902	0.045829	0.0405676	KDM1A/KDM4C/KDM7A/PHF8	4
GO:0033262	regulation of nuclear cell cycle DNA replication	4	986	11	16672	0.00286902	0.045829	0.0405676	ATRX/INO80/TERF2/TIPIN	4
GO:0034497	protein localization to pre-autophagosomal structure	4	986	11	16672	0.00286902	0.045829	0.0405676	PIK3C3/STX17/TRAPPC8/WIPI1	4
GO:0043619	regulation of transcription from RNA polymerase II promoter in response to oxidative stress	4	986	11	16672	0.00286902	0.045829	0.0405676	CHD6/HIF1A/NFE2L2/SIN3A	4
GO:0033045	regulation of sister chromatid segregation	10	986	61	16672	0.00287268	0.045829	0.0405676	APC/ATM/ATRX/BUB1B/CCNB1/CDC27/DLGAP5/LCMT1/NSMCE2/ZNF207	10
GO:0006900	membrane budding	14	986	103	16672	0.00293219	0.0466114	0.0412602	ATP8A1/CHMP5/PDCD6IP/PPP6R3/SCFD1/SEC24B/SEC31A/TMED2/TRAPPC6B/TRAPPC9/USO1/VAPA/VAPB/VPS37A	14
GO:0043241	protein complex disassembly	26	986	246	16672	0.00297608	0.0471406	0.0417286	APC/CAPZA1/CAPZB/CHMP5/CLASP1/CLASP2/DAP3/DNAJC6/FAM21C/GFM2/GLE1/GSK3B/HDGFRP3/KIF18A/MRPL22/MRPL30/MRPL47/MRPS35/MRPS5/MTRF1/PTCD3/RDX/SMARCC1/SMARCD1/SUPT16H/TMOD3	26
GO:0006310	DNA recombination	27	986	259	16672	0.00303466	0.0478981	0.0423991	ATM/ATRX/BACH1/BARD1/BRCA1/BRIP1/DMC1/DNA2/INO80/KDM1A/MND1/MSH3/NSMCE2/POLA1/POLE2/PRIM1/RFC1/RFC2/RNF138/RPA1/SPIDR/TERF2/TFRC/TGFB1/TSN/WHSC1/ZRANB3	27
GO:2001020	regulation of response to DNA damage stimulus	18	986	149	16672	0.00307354	0.0483404	0.0427907	ATM/BRCA1/CD44/DEK/DYRK1A/EYA3/KDM1A/MDM2/NEK4/RFWD3/RNF169/SPIDR/TERF2/TRIP12/UBR5/UIMC1/USP1/WHSC1	18
GO:0071478	cellular response to radiation	19	986	161	16672	0.0031219	0.0489065	0.0432918	ATM/CAMKMT/CREBBP/DDB1/ECT2/EP300/FNTA/GNB1/INO80/KDM1A/MDM2/NIPBL/PAPD4/RHBDD1/SPIDR/STK11/TANK/TGFB1/TLK2	19
GO:0019058	viral life cycle	41	986	444	16672	0.00313151	0.0489065	0.0432918	CCNT2/CHMP5/CTDP1/DDB1/DDX6/DEK/DERL1/EEA1/EIF3B/EP300/EPS15/IDE/ITCH/LARP1/NUP107/NUP153/NUP35/NUP50/NUP54/NUP88/NUP98/NUPL2/PDCD6IP/PKN2/POM121/POM121C/RAB5A/RANBP2/ROCK2/RSF1/SLC20A2/STAU1/TFRC/TRIM25/UBP1/USP6NL/VAPA/VAPB/VPS37A/XPO1/YTHDC2	41
GO:0045732	positive regulation of protein catabolic process	26	986	247	16672	0.00314486	0.0489432	0.0433242	ANKIB1/APC/ARIH1/AURKA/BARD1/BTRC/BUB1B/CCNB1/CDC27/GSK3B/MDM2/NFE2L2/PIAS1/PSMB1/PSMD1/PSME3/PSME4/PTEN/PTK2/RDX/RFWD2/RNF138/RNF217/SKP1/SNX1/UBQLN1	26
GO:0010639	negative regulation of organelle organization	27	986	260	16672	0.00320147	0.0493835	0.043714	APC/ARAP1/ATM/ATRX/BRCA1/BUB1B/CAPZA1/CAPZB/CCNB1/CDK5RAP2/CLASP1/CLASP2/CLEC16A/FAM21C/HDGFRP3/HNRNPC/LCMT1/OMA1/PPFIA1/RDX/SCFD1/SMAD4/TBCD/TERF2/TMOD3/VPS13C/ZNF207	27
GO:0034976	response to endoplasmic reticulum stress	27	986	260	16672	0.00320147	0.0493835	0.043714	ATF6/CCDC47/DERL1/EEF2/EP300/GFPT1/GSK3B/MAP3K5/NFE2L2/PDIA3/POMT1/RHBDD1/SEC31A/SEC63/SERINC3/STT3B/TRIM25/UBAC2/UBE2K/UBQLN1/UBXN4/UGGT1/UGGT2/USP14/USP25/VAPB/WIPI1	27
GO:0032006	regulation of TOR signaling	11	986	72	16672	0.00320643	0.0493835	0.043714	ATM/DEPDC5/FBXO9/FNIP1/HIF1A/RHEB/RICTOR/STK11/UBR1/UBR2/WDR59	11
GO:0043618	regulation of transcription from RNA polymerase II promoter in response to stress	10	986	62	16672	0.0032476	0.0495809	0.0438887	ATF6/BACH1/CHD6/CREBBP/CUL2/EP300/HIF1A/NFE2L2/SIN3A/UBE2D2	10
GO:0008156	negative regulation of DNA replication	7	986	34	16672	0.00326381	0.0495809	0.0438887	PDS5A/SMC1A/STAG2/TERF2/TGFB1/TIPIN/ZRANB3	7
GO:0033046	negative regulation of sister chromatid segregation	7	986	34	16672	0.00326381	0.0495809	0.0438887	APC/ATM/ATRX/BUB1B/CCNB1/LCMT1/ZNF207	7
GO:0090311	regulation of protein deacetylation	7	986	34	16672	0.00326381	0.0495809	0.0438887	DYRK1A/EP300/FNTA/KDM5A/MAPK8/NIPBL/TGFB1	7

## Sheet: CC_up
GO analysis CC_up
ID	Description	GeneRatio	BgRatio	pvalue	p.adjust	qvalue	geneID	Count
GO:0030055	cell-substrate junction	65/1221	395/17942	2.43e-11	1.28e-08	1.07e-08	ACTB/ACTN2/ADAM9/ARHGEF2/CALR/CD44/CD99L2/CIB2/CNN2/CTNNB1/CYFIP1/EPHA2/FLNA/FLNB/FOCAD/HSPG2/ICAM1/ITGB4/KRAS/LIMK1/LPXN/MME/MPZL1/MRC2/MYH9/NCKAP1/NCSTN/NFASC/NOX4/NUP214/PABPC1/PARVA/PDLIM1/PHLDB2/PI4KA/PIP5K1A/PIP5K1C/PPP1R12A/PRKAR2A/PTK2/PTK2B/PTK7/PTPN12/RHOG/RPL13A/RPL37A/RPL5/RPL7A/RPL8/RPLP0/RPLP1/RPLP2/RPS11/RPS14/RPS16/RPS19/RPS4X/RPS5/RPS8/RPS9/SLC9A1/TGFB1I1/TNC/TNS3/TRIP6	65
GO:0005924	cell-substrate adherens junction	64/1221	391/17942	4.38e-11	1.28e-08	1.07e-08	ACTB/ACTN2/ADAM9/ARHGEF2/CALR/CD44/CD99L2/CIB2/CNN2/CTNNB1/CYFIP1/EPHA2/FLNA/FLNB/FOCAD/HSPG2/ICAM1/KRAS/LIMK1/LPXN/MME/MPZL1/MRC2/MYH9/NCKAP1/NCSTN/NFASC/NOX4/NUP214/PABPC1/PARVA/PDLIM1/PHLDB2/PI4KA/PIP5K1A/PIP5K1C/PPP1R12A/PRKAR2A/PTK2/PTK2B/PTK7/PTPN12/RHOG/RPL13A/RPL37A/RPL5/RPL7A/RPL8/RPLP0/RPLP1/RPLP2/RPS11/RPS14/RPS16/RPS19/RPS4X/RPS5/RPS8/RPS9/SLC9A1/TGFB1I1/TNC/TNS3/TRIP6	64
GO:0005925	focal adhesion	63/1221	388/17942	8.8e-11	1.72e-08	1.44e-08	ACTB/ACTN2/ADAM9/ARHGEF2/CALR/CD44/CD99L2/CNN2/CTNNB1/CYFIP1/EPHA2/FLNA/FLNB/FOCAD/HSPG2/ICAM1/KRAS/LIMK1/LPXN/MME/MPZL1/MRC2/MYH9/NCKAP1/NCSTN/NFASC/NOX4/NUP214/PABPC1/PARVA/PDLIM1/PHLDB2/PI4KA/PIP5K1A/PIP5K1C/PPP1R12A/PRKAR2A/PTK2/PTK2B/PTK7/PTPN12/RHOG/RPL13A/RPL37A/RPL5/RPL7A/RPL8/RPLP0/RPLP1/RPLP2/RPS11/RPS14/RPS16/RPS19/RPS4X/RPS5/RPS8/RPS9/SLC9A1/TGFB1I1/TNC/TNS3/TRIP6	63
GO:0022626	cytosolic ribosome	24/1221	111/17942	3.39e-07	4.96e-05	4.15e-05	RPL13A/RPL18A/RPL34/RPL35A/RPL37A/RPL39/RPL5/RPL7A/RPL8/RPLP0/RPLP1/RPLP2/RPS11/RPS12/RPS14/RPS16/RPS19/RPS20/RPS21/RPS4X/RPS5/RPS6/RPS8/RPS9	24
GO:0031252	cell leading edge	49/1221	345/17942	7.54e-07	8.84e-05	7.38e-05	ABLIM1/ABLIM3/ACTG2/AMOTL1/ANXA2/APBB2/APP/ARHGEF2/ATP2B1/CTNNB1/CYFIP1/DIAPH1/EPHA2/FGD1/FGD6/HDAC6/INPPL1/ITGB4/KCNH1/LDB2/MCC/MYH9/MYO10/MYO1C/MYO1G/MYO5A/NCKAP1/NRG1/PDPN/PHLDB2/PIP5K1A/PIP5K1C/PLXND1/PODXL/PRKCI/PRKCZ/PTK2/PTK2B/PTPN13/PTPRK/PTPRM/ROBO2/S100A6/SCRIB/SLC9A1/SPATA13/TIAM2/TRPV1/WIPF1	49
GO:0044391	ribosomal subunit	27/1221	160/17942	1.03e-05	0.00100301	0.00083779	MRPS24/MRPS35/MRPS5/RPL13A/RPL18A/RPL34/RPL35A/RPL37A/RPL39/RPL5/RPL7A/RPL8/RPLP0/RPLP1/RPLP2/RPS11/RPS12/RPS14/RPS16/RPS19/RPS20/RPS21/RPS4X/RPS5/RPS6/RPS8/RPS9	27
GO:0030027	lamellipodium	28/1221	171/17942	1.27e-05	0.00106554	0.000890027	ABLIM1/ABLIM3/ACTG2/AMOTL1/APBB2/APP/CTNNB1/CYFIP1/EPHA2/FGD1/FGD6/INPPL1/MCC/MYO10/MYO1G/NCKAP1/PDPN/PIP5K1A/PLXND1/PODXL/PTK2/PTK2B/PTPN13/PTPRM/SCRIB/SLC9A1/SPATA13/TIAM2	28
GO:0022627	cytosolic small ribosomal subunit	12/1221	42/17942	1.53e-05	0.00111717	0.000933148	RPS11/RPS12/RPS14/RPS16/RPS19/RPS20/RPS21/RPS4X/RPS5/RPS6/RPS8/RPS9	12
GO:0044445	cytosolic part	33/1221	224/17942	2.2e-05	0.00143393	0.00119773	CCT8/ERC1/HBE1/HBG1/HBG2/MAP3K13/PRDX3/RPL13A/RPL18A/RPL34/RPL35A/RPL37A/RPL39/RPL5/RPL7A/RPL8/RPLP0/RPLP1/RPLP2/RPS11/RPS12/RPS14/RPS16/RPS19/RPS20/RPS21/RPS4X/RPS5/RPS6/RPS8/RPS9/SNAP47/TSC2	33
GO:0005840	ribosome	33/1221	226/17942	2.65e-05	0.00151095	0.00126207	EEF2/METTL17/MRPS10/MRPS24/MRPS35/MRPS5/NUFIP2/RPL13A/RPL18A/RPL34/RPL35A/RPL37A/RPL39/RPL5/RPL7A/RPL8/RPLP0/RPLP1/RPLP2/RPS11/RPS12/RPS14/RPS16/RPS19/RPS20/RPS21/RPS4X/RPS5/RPS6/RPS8/RPS9/RRBP1/UBA52	33
GO:0015935	small ribosomal subunit	15/1221	66/17942	2.84e-05	0.00151095	0.00126207	MRPS24/MRPS35/MRPS5/RPS11/RPS12/RPS14/RPS16/RPS19/RPS20/RPS21/RPS4X/RPS5/RPS6/RPS8/RPS9	15
GO:0005844	polysome	11/1221	39/17942	3.94e-05	0.00192477	0.00160772	AGO1/CALR/DIS3L2/DRG1/EEF2/EIF4B/NUFIP2/RPL7A/RPS4X/RPS6/UNK	11
GO:0005913	cell-cell adherens junction	40/1221	327/17942	0.000227704	0.0102642	0.00857347	ANXA2/BZW2/CADM4/CC2D1A/CCT8/CNN2/CRKL/CTNNB1/EEF2/EIF2S3/EPB41L1/EPHA2/ERC1/FLNA/FLNB/FMNL2/HCFC1/HDLBP/MARK2/MKL2/MYH9/PARVA/PDLIM1/PHLDB2/PI4KA/PKM/PTPRM/RANBP1/RANGAP1/RPL34/RPL7A/RUVBL1/SCRIB/SHROOM2/SMAD7/SMAGP/SPTAN1/TMOD3/UBAP2/ZC3HAV1	40
GO:0000791	euchromatin	9/1221	33/17942	0.000263531	0.0107038	0.00894064	CTNNB1/DNMT3A/HIST1H1C/RRP1B/RUVBL2/TBP/TRIM24/TRIM28/UHRF1	9
GO:0005643	nuclear pore	15/1221	80/17942	0.000285979	0.0107038	0.00894064	AAAS/KPNB1/MVP/MYO1C/NUP155/NUP188/NUP210L/NUP214/NUP93/POM121/RANBP17/RANGAP1/SEC13/SNUPN/TPR	15
GO:0043235	receptor complex	39/1221	320/17942	0.000292253	0.0107038	0.00894064	ABHD6/ACVR1/APP/CD44/CNIH2/CNIH3/CSF2RB/ERBB2/ERBB3/FGFR1/GABRB3/GABRE/GRIK5/GRIN2D/IL4R/IMPG2/INSR/ITGAM/ITGAX/ITGB2/ITGB4/LDLR/LEPR/LRP5/LRP5L/LRP8/MYH9/NR3C2/NTRK3/PLXNA1/PLXNB2/PLXNB3/PLXND1/PTK2B/SHANK2/TGFBR1/TGFBR3/TRIP6/VIPR1	39
GO:0022625	cytosolic large ribosomal subunit	12/1221	60/17942	0.000618713	0.0213274	0.0178143	RPL13A/RPL18A/RPL34/RPL35A/RPL37A/RPL39/RPL5/RPL7A/RPL8/RPLP0/RPLP1/RPLP2	12
GO:0005938	cell cortex	29/1221	234/17942	0.00127734	0.0415844	0.0347346	ACTB/ACTN2/ANXA2/AXIN1/CTNNB1/EXOC2/EXOC4/EXOC6B/EXOC7/FGFR2/FLNA/FLNB/FRYL/KRT19/MELK/MYH9/MYO10/MYO9B/PHLDB2/PRKCZ/PSEN2/PTK2/PTK2B/RALB/SHROOM2/SHROOM4/SPTAN1/STIM1/WDPCP	29
GO:0061695	transferase complex, transferring phosphorus-containing groups	29/1221	237/17942	0.00155583	0.0479851	0.040081	ACVR1/CCNY/CDK13/CDK14/ERC1/ERCC2/INSR/INTS3/INTS4/INTS6/INTS9/MAP3K13/MTOR/PIK3C2B/PIK3CG/PIK3R3/POLA2/POLD1/POLE/POLR1E/POLR3E/POLR3H/PRDX3/PRKAR1B/PRKAR2A/SESN2/TBP/TGFBR1/VAC14	29

## Sheet: CC_down
GO analysis CC_down
ID	Description	GeneRatio	BgRatio	pvalue	p.adjust	qvalue	geneID	Count
GO:0005819	spindle	44/1020	287/17942	1.72985e-09	9.42769e-07	7.33821e-07	ARL8B/ATM/AURKA/BIRC6/BUB1B/CCNB1/CDC14A/CDC27/CDK5RAP2/CEP128/CEP350/CLASP1/CLASP2/CSPP1/CTDP1/DLGAP5/ECT2/EVI5/GPSM2/HAUS1/HAUS6/KIF14/KIF15/KIF18A/KIF3B/KNTC1/MAPK1/NDE1/NEDD1/NEK7/NSUN2/NUSAP1/PKD2/PRC1/SEPT2/SEPT6/SKA3/SPECC1L/TPX2/TUBGCP3/TUBGCP4/VRK1/WDR62/ZNF207	44
GO:0005813	centrosome	59/1020	483/17942	2.30855e-08	6.2908e-06	4.89656e-06	APC/AURKA/CAPRIN2/CCDC77/CCNB1/CDC14A/CDC27/CDK5RAP2/CEP128/CEP192/CEP350/CEP57/CEP57L1/CLASP1/CSPP1/CTDP1/DCAF12/DLGAP5/DTL/EXOC7/EYA3/FGFR1OP/GSK3B/HAUS1/HAUS6/KIF15/KIF3B/MASTL/MBNL1/MIB1/MPHOSPH9/NCAPG/NDE1/NEDD1/NEK1/NEK9/NFE2L2/NUP107/PCM1/PCNT/PKN2/PRKACB/RAD18/RFWD2/ROCK2/SCLT1/SKP1/SLAIN2/STIL/TBC1D31/TCP1/TSEN2/TTBK2/TTC19/TUBGCP3/TUBGCP4/USP33/VPS37A/WDR62	59
GO:0098687	chromosomal region	46/1020	341/17942	4.4145e-08	8.01967e-06	6.24226e-06	AHCTF1/APC/ATM/ATRX/AURKA/BUB1B/CCNB1/CDC73/CENPH/CLASP1/CLASP2/DDB1/DMC1/DNA2/DNMT1/DOT1L/HAT1/HIST1H4E/ITGB3BP/KANSL1/KDM1A/KIF18A/KNTC1/NDE1/NSMCE2/NUP107/NUP98/ORC4/ORC5/PDS5A/PDS5B/PPP2R5C/PTGES3/RPA1/SEPT2/SEPT6/SIN3A/SKA3/SMC1A/SP100/STAG2/SUV39H2/TERF2/XPO1/ZNF207/ZWILCH	46
GO:0005913	cell-cell adherens junction	44/1020	327/17942	9.32561e-08	1.27061e-05	9.89006e-06	APC/ASAP1/CAPZA1/CAPZB/CD226/CDH1/CHMP5/CTNNA1/DDX6/DIAPH3/DLG1/EEF2/EPN2/EPS15/ESYT2/FLNA/GAPVD1/GIGYF2/KTN1/LARP1/PAK2/PCMT1/PDLIM5/PICALM/PKN2/PLEC/RARS/RDX/RSL1D1/SEPT2/SEPT9/SLK/SNX1/SNX5/STK38/TMOD3/TMPO/TRIM25/UBAP2/USO1/USP8/VAPA/VAPB/YWHAE	44
GO:0000775	chromosome, centromeric region	30/1020	184/17942	1.69204e-07	1.84433e-05	1.43557e-05	AHCTF1/APC/ATRX/AURKA/BUB1B/CCNB1/CENPH/CLASP1/CLASP2/DNMT1/ITGB3BP/KANSL1/KIF18A/KNTC1/NDE1/NUP107/NUP98/PDS5A/PDS5B/PPP2R5C/SEPT2/SEPT6/SIN3A/SKA3/SMC1A/STAG2/SUV39H2/XPO1/ZNF207/ZWILCH	30
GO:0016604	nuclear body	44/1020	349/17942	5.96111e-07	5.41467e-05	4.21461e-05	AGGF1/AK6/ATRX/CPSF6/CREBBP/DYRK1A/EIF4ENIF1/HIF1A/HIPK3/HNRNPM/ICE2/KIAA1429/KMT2E/LUC7L3/MDM2/METTL3/MORC3/MTDH/NPAT/NRIP1/NSMCE2/PABPN1/PATL1/PIAS1/PNISR/PNN/PSME4/PSPC1/PTEN/RBM39/RFWD2/RFWD3/RPA1/RREB1/RSRC1/SATB1/SP100/SRP54/SRSF4/UBE2I/XPO1/ZMYM2/ZNF451/ZNF638	44
GO:0000776	kinetochore	22/1020	129/17942	3.42157e-06	0.000266394	0.000207352	AHCTF1/APC/BUB1B/CCNB1/CENPH/CLASP1/CLASP2/ITGB3BP/KANSL1/KIF18A/KNTC1/NDE1/NUP107/NUP98/SEPT2/SEPT6/SIN3A/SKA3/SMC1A/XPO1/ZNF207/ZWILCH	22
GO:0031984	organelle subcompartment	37/1020	306/17942	1.20994e-05	0.000824269	0.000641584	AP1G1/ARAP1/ASPH/ATP2C1/ATP7A/ATP8A1/ATP9B/ATXN2/B4GALT6/BIRC6/CDH1/CLASP2/CNST/COG2/COG3/FUT8/GALNT2/GOLGA1/GOLIM4/GOSR1/GPR89A/RAB18/RAB6A/RAC1/RHOBTB3/SCFD1/SGMS1/STX6/TMED2/TMEM165/TRAPPC9/USO1/USP6NL/UXS1/VAMP3/VRK1/WIPI1	37
GO:0005635	nuclear envelope	46/1020	420/17942	1.5536e-05	0.00094079	0.000732281	AGFG1/AHCTF1/ATF6/ATP11B/BNIP2/BRAP/BRIP1/CEPT1/CSE1L/DPY19L1/DTL/FAF1/FAM188A/FANCL/GLE1/GNAQ/INTS2/MTDH/NUP107/NUP153/NUP35/NUP50/NUP54/NUP88/NUP98/NUPL2/PCM1/PHF20/PHF8/POLA1/POM121/POM121C/QSOX2/RANBP2/RB1CC1/RNF13/TMPO/TNPO1/TNPO3/TRA2B/TXLNG/UBE2I/UBXN4/VAPA/XPO1/XPO7	46
GO:0031965	nuclear membrane	34/1020	277/17942	1.96924e-05	0.000975485	0.000759286	AHCTF1/ATP11B/BRAP/BRIP1/CEPT1/DPY19L1/DTL/FAM188A/GNAQ/INTS2/MTDH/NUP107/NUP153/NUP35/NUP50/NUP54/NUP98/NUPL2/PCM1/PHF20/PHF8/POM121/POM121C/QSOX2/RANBP2/RB1CC1/RNF13/TMPO/TNPO1/TNPO3/TRA2B/TXLNG/VAPA/XPO1	34
GO:0098791	Golgi subcompartment	35/1020	289/17942	1.99489e-05	0.000975485	0.000759286	AP1G1/ARAP1/ATP2C1/ATP7A/ATP8A1/ATP9B/ATXN2/B4GALT6/BIRC6/CDH1/CLASP2/CNST/COG2/COG3/FUT8/GALNT2/GOLGA1/GOLIM4/GOSR1/GPR89A/RAB6A/RAC1/RHOBTB3/SCFD1/SGMS1/STX6/TMED2/TMEM165/TRAPPC9/USO1/USP6NL/UXS1/VAMP3/VRK1/WIPI1	35
GO:0000151	ubiquitin ligase complex	35/1020	290/17942	2.14786e-05	0.000975485	0.000759286	ANKIB1/ARIH1/ATG3/BACH1/BARD1/BRAP/BRCA1/BTRC/BUB1B/CACUL1/CDC27/CRBN/CUL2/DCAF12/DCAF17/DCAF6/DCUN1D4/DDB1/DTL/FBXO25/FBXO7/FBXO9/KLHL24/KLHL8/MED1/PCGF6/PHC3/RAD18/RNF217/SKP1/UBE2D2/UBE2L3/UBR1/UBR2/USP33	35
GO:0000922	spindle pole	20/1020	125/17942	2.48734e-05	0.00104277	0.000811658	AURKA/BIRC6/CCNB1/CDC14A/CDK5RAP2/CEP128/CSPP1/CTDP1/DLGAP5/GPSM2/HAUS1/KNTC1/NDE1/NEDD1/NEK7/PRC1/TPX2/TUBGCP3/TUBGCP4/WDR62	20
GO:0016234	inclusion body	14/1020	69/17942	2.76573e-05	0.00107666	0.000838037	CCZ1/CCZ1B/CDH1/EEF2/EPS15/FBXO7/NUP153/NUP98/PABPN1/PICALM/RAD18/RANBP2/UBQLN1/XRN2	14
GO:0005657	replication fork	13/1020	62/17942	3.69026e-05	0.00130019	0.00101203	DNMT1/MCM10/POLA1/POLE2/PRIM1/RAD18/RFC1/RFC2/RPA1/SMARCA5/TIPIN/TOP1/ZRANB3	13
GO:0005643	nuclear pore	15/1020	80/17942	3.85699e-05	0.00130019	0.00101203	AGFG1/AHCTF1/GLE1/NUP107/NUP153/NUP35/NUP50/NUP54/NUP88/NUP98/NUPL2/POM121/POM121C/RANBP2/XPO7	15
GO:0000779	condensed chromosome, centromeric region	18/1020	109/17942	4.05564e-05	0.00130019	0.00101203	AHCTF1/AURKA/BUB1B/CCNB1/CENPH/CLASP1/CLASP2/ITGB3BP/KANSL1/KNTC1/NDE1/NUP107/SEPT2/SEPT6/SKA3/SMC1A/ZNF207/ZWILCH	18
GO:0000777	condensed chromosome kinetochore	17/1020	100/17942	4.50346e-05	0.00136355	0.00106134	AHCTF1/BUB1B/CCNB1/CENPH/CLASP1/CLASP2/ITGB3BP/KANSL1/KNTC1/NDE1/NUP107/SEPT2/SEPT6/SKA3/SMC1A/ZNF207/ZWILCH	17
GO:0034708	methyltransferase complex	16/1020	91/17942	4.90444e-05	0.0014068	0.00109501	AEBP2/ASH2L/CLNS1A/EED/EZH1/EZH2/JARID2/KANSL1/KIAA1429/KMT2C/KMT2E/METTL3/MGA/PHF20/STK38/SUZ12	16
GO:0000793	condensed chromosome	26/1020	202/17942	8.23432e-05	0.00221339	0.00172283	ADD3/AHCTF1/AURKA/BRCA1/BUB1B/CCNB1/CENPH/CLASP1/CLASP2/DMC1/ITGB3BP/KANSL1/KNTC1/NCAPG/NDE1/NSMCE2/NUP107/PMS1/SEPT2/SEPT6/SKA3/SMARCA5/SMC1A/UBE2I/ZNF207/ZWILCH	26
GO:0000785	chromatin	46/1020	450/17942	8.52865e-05	0.00221339	0.00172283	AFF4/AHCTF1/ASH2L/ASXL1/ATRX/CREBBP/DDX6/DNMT1/EED/ESCO1/EXOSC10/EZH2/HAT1/HIST1H4E/HNRNPC/HP1BP3/ICE2/INO80/KDM1A/KDM4C/MED1/NCOA1/NFE2L2/NIPBL/NRIP1/PDS5A/PDS5B/POLA1/SATB1/SETD3/SHPRH/SIN3A/SMAD2/SMAD4/SMARCC1/STAG2/SUV39H2/SUZ12/TCP1/TIPIN/TMPO/TRIM24/TRRAP/UBR2/UHRF2/USP3	46
GO:0031519	PcG protein complex	10/1020	44/17942	0.000142391	0.00352742	0.00274563	AEBP2/ASXL1/EED/EZH1/EZH2/JARID2/PCGF6/PHC3/SKP1/SUZ12	10
GO:0035097	histone methyltransferase complex	13/1020	71/17942	0.000160569	0.00369288	0.00287442	AEBP2/ASH2L/EED/EZH1/EZH2/JARID2/KANSL1/KMT2C/KMT2E/MGA/PHF20/STK38/SUZ12	13
GO:0035098	ESC/E(Z) complex	6/1020	16/17942	0.000162622	0.00369288	0.00287442	AEBP2/EED/EZH1/EZH2/JARID2/SUZ12	6
GO:0005876	spindle microtubule	11/1020	54/17942	0.000190443	0.00415166	0.00323152	AURKA/CDC27/CLASP1/CLASP2/KIF18A/KIF3B/KNTC1/NUSAP1/PRC1/SKA3/TUBGCP3	11
GO:0030120	vesicle coat	10/1020	46/17942	0.000210949	0.00442182	0.0034418	AFTPH/AP2M1/ARCN1/C3orf58/COPA/EPN2/EPS15/PICALM/SEC24B/SEC31A	10
GO:0044454	nuclear chromosome part	48/1020	496/17942	0.000224379	0.00452913	0.00352533	ASH2L/ASXL1/ATM/ATRX/AURKA/BRCA1/BUB1B/CCNB1/CDC73/CREBBP/DDB1/DNA2/EED/EZH2/HAT1/HIST1H4E/HNRNPC/INO80/KDM1A/KDM4C/MCM10/NCOA1/NRIP1/ORC4/ORC5/PMS1/POLA1/POLE2/RPA1/SATB1/SETD3/SIN3A/SMAD2/SMAD4/SMARCA5/SMARCC1/SP100/SUZ12/TCP1/TERF2/TIPIN/TOP1/TRIM24/TRRAP/UBE2I/UHRF2/USP3/ZRANB3	48
GO:0005874	microtubule	40/1020	394/17942	0.0002784	0.00541885	0.00421786	APC/AURKA/CCT2/CCT3/CDC27/CDK5RAP2/CEP57/CEP57L1/CLASP1/CLASP2/CSPP1/DLG1/GAS2L3/HAUS1/HAUS6/INO80/KIF14/KIF15/KIF16B/KIF18A/KIF3B/KNTC1/KRIT1/NDE1/NEK7/NUSAP1/PCNT/PRC1/RASSF3/SEPT9/SKA3/SLAIN2/SS18/STAU2/TBCD/TCP1/TPX2/TUBGCP3/TUBGCP4/ZNF207	40
GO:0016605	PML body	15/1020	95/17942	0.000289256	0.00543602	0.00423123	ATRX/EIF4ENIF1/HIPK3/MORC3/NSMCE2/PATL1/PIAS1/PTEN/RFWD3/RPA1/SATB1/SP100/UBE2I/ZMYM2/ZNF451	15
GO:0010008	endosome membrane	40/1020	397/17942	0.00032517	0.00582	0.0045301	ACAP2/ANXA6/AP2M1/APPL2/ARL8B/ATP11B/ATP6V0A1/CHMP5/CLEC16A/EEA1/EPS15/FAM21C/GOLIM4/KIAA0319/KIF16B/MITD1/MMD/PLEKHM1/RAB12/RAB23/RAB27A/RAB5A/RAB5C/RAC1/RNF13/RUFY1/SCYL2/SNX1/SNX13/SNX5/SNX6/SPG21/STAM/TMEM106B/TMEM165/UBAP1/USP8/VPS36/VPS37A/WIPI1	40
GO:0042405	nuclear inclusion body	5/1020	12/17942	0.00033276	0.00582	0.0045301	NUP153/NUP98/PABPN1/RAD18/RANBP2	5
GO:0000242	pericentriolar material	6/1020	18/17942	0.000341725	0.00582	0.0045301	CDK5RAP2/CEP192/NEDD1/NEK1/PCM1/TCP1	6
GO:0099568	cytoplasmic region	31/1020	283/17942	0.00036241	0.00598526	0.00465873	ACTN4/ACTR2/ADD3/AKT2/ASPH/C2CD5/CANX/CDH1/CLASP1/CLASP2/EPB41/EXOC2/EXOC6B/EXOC7/FLNA/FRYL/GLRX3/GPSM2/HIF1A/KIF3B/MAP2K4/MAPK1/MELK/MKLN1/NRBP1/PKD2/PTK2/RDX/SEPT2/SEPT6/SEPT9	31
GO:0005802	trans-Golgi network	23/1020	188/17942	0.000435059	0.00697373	0.00542813	AP1G1/ARAP1/ATP2C1/ATP7A/ATP8A1/ATP9B/ATXN2/BIRC6/CDH1/CLASP2/CNST/COG2/COG3/GOLGA1/RAB6A/RAC1/RHOBTB3/STX6/TMEM165/TRAPPC9/USP6NL/VAMP3/WIPI1	23
GO:0035770	ribonucleoprotein granule	20/1020	154/17942	0.000465628	0.0072505	0.00564355	AGO2/ATXN2/CAPRIN1/CNOT1/CPEB1/DCP2/DDX6/EIF4ENIF1/FXR1/LARP4B/LSM14A/MBNL1/NSUN2/PAN3/PATL1/RAC1/ROCK2/STAU1/TNRC6A/TOP1	20
GO:0070603	SWI/SNF superfamily-type complex	12/1020	71/17942	0.000609711	0.00916879	0.00713669	APPL2/ATRX/BAZ1A/BPTF/INO80/PBRM1/RSF1/SMARCA5/SMARCC1/SMARCD1/SS18/TRRAP	12
GO:0036464	cytoplasmic ribonucleoprotein granule	19/1020	146/17942	0.000622468	0.00916879	0.00713669	AGO2/ATXN2/CAPRIN1/CNOT1/CPEB1/DCP2/DDX6/EIF4ENIF1/LARP4B/LSM14A/MBNL1/NSUN2/PAN3/PATL1/RAC1/ROCK2/STAU1/TNRC6A/TOP1	19
GO:0031901	early endosome membrane	16/1020	113/17942	0.000647565	0.00928744	0.00722905	APPL2/EEA1/EPS15/FAM21C/KIAA0319/KIF16B/RAB5A/RAB5C/RAC1/RUFY1/SNX1/SNX13/SNX5/SNX6/STAM/TMEM165	16
GO:0005776	autophagosome	13/1020	83/17942	0.000778363	0.0108771	0.00846641	ATG5/C6orf106/PIK3C3/PIP4K2A/RAB12/RAB23/STX17/TBC1D12/TBC1D14/UBQLN1/USP33/VMP1/WIPI1	13
GO:0044450	microtubule organizing center part	19/1020	149/17942	0.000800765	0.0109104	0.00849232	AURKA/BRCA1/CDK5RAP2/CEP128/CEP192/CLASP1/EXOC7/MPHOSPH9/NEDD1/NEK1/PCM1/PCNT/SCLT1/STIL/TCP1/TTBK2/TUBGCP3/TUBGCP4/WDR62	19
GO:0016607	nuclear speck	23/1020	197/17942	0.000839583	0.0109686	0.00853763	AGGF1/DYRK1A/EIF4ENIF1/HIF1A/KIAA1429/KMT2E/LUC7L3/METTL3/NRIP1/PABPN1/PATL1/PIAS1/PNISR/PNN/PSME4/PSPC1/RBM39/RFWD2/RREB1/RSRC1/SRP54/SRSF4/ZNF638	23
GO:0005938	cell cortex	26/1020	234/17942	0.000845288	0.0109686	0.00853763	ACTN4/ACTR2/ADD3/AKT2/ASPH/C2CD5/CDH1/CLASP1/CLASP2/EPB41/EXOC2/EXOC6B/EXOC7/FLNA/FRYL/GLRX3/GPSM2/MELK/MKLN1/NRBP1/PKD2/PTK2/RDX/SEPT2/SEPT6/SEPT9	26
GO:0030135	coated vesicle	26/1020	236/17942	0.000958692	0.0121509	0.00945785	AFTPH/AP1G1/AP2M1/ARCN1/ATP7A/C3orf58/COPA/DENND1A/DENND1B/DNAJC5/EPN2/EPS15/FCHO2/LMBRD1/PICALM/RAB27A/SCYL2/SEC24B/SEC31A/SPG21/STX17/STX6/TMED2/USO1/VAMP3/WIPI1	26
GO:0061695	transferase complex, transferring phosphorus-containing groups	26/1020	237/17942	0.00102019	0.0126364	0.00983579	CCNT2/CCNY/CDC73/CHD6/CRCP/CTDP1/DNA2/INTS2/KDM5A/MAP3K5/PAPD4/PHKB/PIK3C2B/PIK3C3/POLA1/POLE2/POLR3C/PRKACB/PRPSAP2/RB1CC1/RPAP2/RPRD1A/RPRD2/TAF12/TRRAP/URI1	26
GO:0000932	cytoplasmic mRNA processing body	12/1020	76/17942	0.00113854	0.013017	0.010132	AGO2/CAPRIN1/CNOT1/CPEB1/DCP2/DDX6/EIF4ENIF1/LSM14A/PAN3/PATL1/TNRC6A/TOP1	12
GO:0044448	cell cortex part	16/1020	119/17942	0.00114361	0.013017	0.010132	ACTN4/ACTR2/ASPH/CDH1/CLASP1/CLASP2/EPB41/EXOC2/EXOC6B/EXOC7/FLNA/PKD2/RDX/SEPT2/SEPT6/SEPT9	16
GO:0000502	proteasome complex	11/1020	66/17942	0.00114645	0.013017	0.010132	IDE/PSMB1/PSMD1/PSME3/PSME4/RAD23B/UBE3A/UBE3C/UBQLN1/UBR1/USP14	11
GO:1905369	endopeptidase complex	11/1020	66/17942	0.00114645	0.013017	0.010132	IDE/PSMB1/PSMD1/PSME3/PSME4/RAD23B/UBE3A/UBE3C/UBQLN1/UBR1/USP14	11
GO:0043596	nuclear replication fork	8/1020	39/17942	0.00134868	0.0150007	0.011676	MCM10/POLA1/POLE2/RPA1/SMARCA5/TIPIN/TOP1/ZRANB3	8
GO:0044440	endosomal part	40/1020	429/17942	0.00146967	0.0158931	0.0123706	ACAP2/ANXA6/AP2M1/APPL2/ARL8B/ATP11B/ATP6V0A1/CHMP5/CLEC16A/EEA1/EPS15/FAM21C/GOLIM4/KIAA0319/KIF16B/MITD1/MMD/PLEKHM1/RAB12/RAB23/RAB27A/RAB5A/RAB5C/RAC1/RNF13/RUFY1/SCYL2/SNX1/SNX13/SNX5/SNX6/SPG21/STAM/TMEM106B/TMEM165/UBAP1/USP8/VPS36/VPS37A/WIPI1	40
GO:0005795	Golgi stack	16/1020	122/17942	0.0014933	0.0158931	0.0123706	ARAP1/B4GALT6/COG2/COG3/FUT8/GALNT2/GOLGA1/GOLIM4/GOSR1/GPR89A/SCFD1/SGMS1/TMED2/USO1/UXS1/VRK1	16
GO:0030014	CCR4-NOT complex	5/1020	16/17942	0.0015164	0.0158931	0.0123706	CNOT1/CNOT10/CNOT6/CNOT6L/PATL1	5
GO:0031010	ISWI-type complex	4/1020	10/17942	0.00165386	0.0170067	0.0132375	BAZ1A/BPTF/RSF1/SMARCA5	4
GO:0031985	Golgi cisterna	13/1020	92/17942	0.00205233	0.0207133	0.0161226	ARAP1/B4GALT6/COG3/FUT8/GALNT2/GOLGA1/GOLIM4/GOSR1/GPR89A/SCFD1/SGMS1/TMED2/UXS1	13
GO:0030662	coated vesicle membrane	17/1020	138/17942	0.00215035	0.0208764	0.0162495	AFTPH/AP1G1/AP2M1/ARCN1/C3orf58/COPA/DENND1A/DNAJC5/EPN2/EPS15/PICALM/SEC24B/SEC31A/STX17/TMED2/USO1/VAMP3	17
GO:0099023	tethring complex	10/1020	61/17942	0.00215719	0.0208764	0.0162495	COG2/COG3/EXOC2/EXOC6B/EXOC7/NBAS/SCFD1/SEPT2/STX17/TRAPPC8	10
GO:0016235	aggresome	7/1020	33/17942	0.00218341	0.0208764	0.0162495	CCZ1/CCZ1B/CDH1/EEF2/EPS15/UBQLN1/XRN2	7
GO:1990391	DNA repair complex	8/1020	42/17942	0.0022252	0.0209092	0.016275	ATM/KDM1A/MSH3/PHF21A/PMS1/PMS2/POLE2/RAD23B	8
GO:0080008	Cul4-RING E3 ubiquitin ligase complex	6/1020	25/17942	0.00231603	0.0213939	0.0166523	CRBN/DCAF12/DCAF17/DCAF6/DDB1/DTL	6
GO:0030136	clathrin-coated vesicle	18/1020	154/17942	0.00290383	0.0263764	0.0205306	AFTPH/AP1G1/AP2M1/ATP7A/DENND1A/DENND1B/DNAJC5/EPN2/EPS15/FCHO2/LMBRD1/PICALM/RAB27A/SCYL2/SPG21/STX6/VAMP3/WIPI1	18
GO:0034399	nuclear periphery	15/1020	119/17942	0.00305754	0.0264539	0.0205908	AHCTF1/HAT1/HNRNPM/MORC3/NUP107/NUP153/NUP35/NUP98/POLA1/PSPC1/RUNX1T1/SATB1/SCAF8/TNPO1/YEATS4	15
GO:0005765	lysosomal membrane	28/1020	283/17942	0.00312847	0.0264539	0.0205908	ANXA6/AP1G1/AP2M1/ARL8B/CCZ1/CCZ1B/CLEC16A/DEPDC5/DNAJC5/GNAQ/GNB1/GNB4/LMBRD1/MFSD8/MMD/NAPG/PLEKHM1/PSAP/RAB12/RAB5C/RHEB/RNF13/SLC44A2/SPG11/SPPL3/TMEM106B/TMEM165/TMEM63A	28
GO:0098852	lytic vacuole membrane	28/1020	283/17942	0.00312847	0.0264539	0.0205908	ANXA6/AP1G1/AP2M1/ARL8B/CCZ1/CCZ1B/CLEC16A/DEPDC5/DNAJC5/GNAQ/GNB1/GNB4/LMBRD1/MFSD8/MMD/NAPG/PLEKHM1/PSAP/RAB12/RAB5C/RHEB/RNF13/SLC44A2/SPG11/SPPL3/TMEM106B/TMEM165/TMEM63A	28
GO:0032153	cell division site	9/1020	54/17942	0.00315505	0.0264539	0.0205908	ECT2/MASTL/NDE1/PKN2/RDX/SEPT2/SEPT6/TUBGCP3/TUBGCP4	9
GO:0032155	cell division site part	9/1020	54/17942	0.00315505	0.0264539	0.0205908	ECT2/MASTL/NDE1/PKN2/RDX/SEPT2/SEPT6/TUBGCP3/TUBGCP4	9
GO:0032580	Golgi cisterna membrane	11/1020	75/17942	0.00328612	0.0271354	0.0211213	ARAP1/B4GALT6/COG3/FUT8/GALNT2/GOLGA1/GOLIM4/GPR89A/SCFD1/TMED2/UXS1	11
GO:0051233	spindle midzone	6/1020	27/17942	0.00351275	0.0282343	0.0219767	ARL8B/AURKA/BUB1B/CTDP1/KIF14/KIF18A	6
GO:0072686	mitotic spindle	9/1020	55/17942	0.0035861	0.0282343	0.0219767	AURKA/CDC14A/CDK5RAP2/CLASP2/ECT2/GPSM2/KIF18A/MAPK1/PKD2	9
GO:0030496	midbody	16/1020	133/17942	0.00363388	0.0282343	0.0219767	ARL8B/AURKA/BIRC6/CTDP1/ECT2/KIF14/KIF3B/MITD1/PIK3C3/PKN2/PRC1/RDX/SEPT2/SEPT6/TTC19/USP8	16
GO:1905368	peptidase complex	12/1020	87/17942	0.00367802	0.0282343	0.0219767	IDE/PSMB1/PSMD1/PSME3/PSME4/RAD23B/SUPT20H/UBE3A/UBE3C/UBQLN1/UBR1/USP14	12
GO:0010494	cytoplasmic stress granule	7/1020	36/17942	0.00367824	0.0282343	0.0219767	ATXN2/CAPRIN1/DDX6/LARP4B/LSM14A/MBNL1/STAU1	7
GO:0030117	membrane coat	12/1020	88/17942	0.00404402	0.0301917	0.0235002	AFTPH/AP1G1/AP2M1/ARCN1/C3orf58/COPA/EPN2/EPS15/PICALM/SCLT1/SEC24B/SEC31A	12
GO:0048475	coated membrane	12/1020	88/17942	0.00404402	0.0301917	0.0235002	AFTPH/AP1G1/AP2M1/ARCN1/C3orf58/COPA/EPN2/EPS15/PICALM/SCLT1/SEC24B/SEC31A	12
GO:0030128	clathrin coat of endocytic vesicle	4/1020	13/17942	0.00490946	0.0361575	0.0281439	AP2M1/EPN2/EPS15/PICALM	4
GO:0031461	cullin-RING ubiquitin ligase complex	18/1020	165/17942	0.00603084	0.0432475	0.0336625	BACH1/BTRC/BUB1B/CACUL1/CDC27/CRBN/CUL2/DCAF12/DCAF17/DCAF6/DDB1/DTL/FBXO25/FBXO7/FBXO9/KLHL24/KLHL8/SKP1	18
GO:0043209	myelin sheath	18/1020	165/17942	0.00603084	0.0432475	0.0336625	ATP5C1/CANX/CCT2/CCT3/COX5A/DLG1/GDI2/GNB1/GNB4/NAPG/NDUFA10/PDCD6IP/PDIA3/PTEN/RDX/SEPT2/TCP1/VDAC2	18
GO:0005769	early endosome	28/1020	298/17942	0.0063584	0.0450043	0.0350299	AKT2/APPL2/ATP11B/C16orf62/DERL1/EEA1/EPS15/FAM21C/KIAA0319/KIF16B/MAPK1/PTP4A2/RAB5A/RAB5C/RABGAP1L/RABGEF1/RAC1/RPS6KC1/RUFY1/SNX1/SNX13/SNX5/SNX6/STAM/STX6/TMEM165/TRAK2/USP8	28
GO:0038201	TOR complex	4/1020	14/17942	0.00656745	0.045888	0.0357177	LARP1/MAPKAP1/PRR5L/RICTOR	4
GO:0042470	melanosome	13/1020	106/17942	0.00706236	0.0481123	0.0374491	AHCY/ANXA6/ATP6V0A1/CANX/DNAJC5/PDCD6IP/PDIA3/RAB27A/RAB5A/RAB5C/RAC1/TFRC/YWHAE	13
GO:0048770	pigment granule	13/1020	106/17942	0.00706236	0.0481123	0.0374491	AHCY/ANXA6/ATP6V0A1/CANX/DNAJC5/PDCD6IP/PDIA3/RAB27A/RAB5A/RAB5C/RAC1/TFRC/YWHAE	13
GO:0000407	pre-autophagosomal structure	6/1020	31/17942	0.00720016	0.0484455	0.0377084	ATG5/C6orf106/RB1CC1/TRAPPC8/VMP1/WIPI1	6

## Sheet: MF_up
GO analysis MF_up
ID	Description	GeneRatio	BgRatio	pvalue	p.adjust	qvalue	geneID	Count
GO:0005088	Ras guanyl-nucleotide exchange factor activity	36/1147	228/16309	3.9227e-06	0.00214287	0.00190641	ABR/ACTN2/ARHGEF10/ARHGEF10L/ARHGEF2/CSF2RB/DENND1B/DENND2D/DENND5A/DENND5B/DNMBP/DOCK1/ERBB2/ERBB3/FARP2/FGD1/FGD6/FGFR1/FGFR2/GRIN2D/NRG1/PREX2/PTK2/RAPGEF1/RAPGEF5/RASGRF2/RGL3/RIN3/SERGEF/SHC2/SHC3/SPATA13/SPTAN1/ST5/TIAM2/TRIO	36
GO:0046332	SMAD binding	17/1147	70/16309	4.98922e-06	0.00214287	0.00190641	ACVR1/AXIN1/COL1A2/COL3A1/CTNNB1/FLNA/HIPK2/RANBP3/RNF111/SMAD4/SMAD7/TCF12/TGFB1I1/TGFBR1/TGFBR3/USP9Y/ZC3H3	17
GO:0031267	small GTPase binding	40/1147	278/16309	1.19013e-05	0.00340775	0.00303171	ANKRD27/ANXA2/ARHGEF2/BICD2/CYFIP1/DENND1B/DENND5A/DIAPH1/ERC1/EXOC2/EXOC4/FGD1/FGD6/FLNA/FMNL2/HACE1/KPNB1/MAP3K11/MICAL3/MYO1C/MYO5A/MYO9B/NCKAP1/RAB11FIP4/RABGGTA/RANBP1/RANBP17/RANGAP1/RGL3/RIN3/RTKN/SRGAP1/SYTL5/TBC1D1/TBC1D4/TNPO2/TSC2/XPO1/XPO5/XPO6	40
GO:0017016	Ras GTPase binding	37/1147	260/16309	3.18977e-05	0.00424842	0.00377961	ANKRD27/ANXA2/ARHGEF2/BICD2/CYFIP1/DENND1B/DENND5A/DIAPH1/ERC1/EXOC2/EXOC4/FLNA/FMNL2/HACE1/KPNB1/MAP3K11/MICAL3/MYO1C/MYO5A/MYO9B/NCKAP1/RAB11FIP4/RABGGTA/RANBP1/RANBP17/RANGAP1/RGL3/RIN3/RTKN/SRGAP1/SYTL5/TBC1D1/TBC1D4/TNPO2/XPO1/XPO5/XPO6	37
GO:0051020	GTPase binding	41/1147	300/16309	3.20589e-05	0.00424842	0.00377961	ANKRD27/ANXA2/ARHGEF2/BICD2/CYFIP1/DENND1B/DENND5A/DIAPH1/ERC1/EXOC2/EXOC4/FGD1/FGD6/FLNA/FMNL2/GNB1/HACE1/KPNB1/MAP3K11/MICAL3/MYO1C/MYO5A/MYO9B/NCKAP1/RAB11FIP4/RABGGTA/RANBP1/RANBP17/RANGAP1/RGL3/RIN3/RTKN/SRGAP1/SYTL5/TBC1D1/TBC1D4/TNPO2/TSC2/XPO1/XPO5/XPO6	41
GO:0019199	transmembrane receptor protein kinase activity	17/1147	80/16309	3.29211e-05	0.00424842	0.00377961	ACVR1/AXL/BMPR2/CRIM1/EFEMP1/EPHA2/EPHB2/EPHB4/ERBB2/FGFR1/FGFR2/INSR/NTRK3/PDGFRL/ROR2/TGFBR1/TGFBR3	17
GO:0070411	I-SMAD binding	6/1147	11/16309	4.05688e-05	0.00424842	0.00377961	AXIN1/CTNNB1/SMAD4/SMAD7/TGFB1I1/TGFBR1	6
GO:0005085	guanyl-nucleotide exchange factor activity	41/1147	306/16309	5.07773e-05	0.00424842	0.00377961	ABR/ACTN2/ANKRD27/ARFGEF3/ARHGEF10/ARHGEF10L/ARHGEF2/CSF2RB/DENND1B/DENND2D/DENND5A/DENND5B/DNMBP/DOCK1/DOCK3/DOCK5/DOCK6/ERBB2/ERBB3/FARP2/FGD1/FGD6/FGFR1/FGFR2/GRIN2D/NRG1/PREX2/PTK2/RAPGEF1/RAPGEF5/RASGRF2/RGL3/RIN3/SERGEF/SHC2/SHC3/SPATA13/SPTAN1/ST5/TIAM2/TRIO	41
GO:0017136	NAD-dependent histone deacetylase activity	7/1147	16/16309	5.43505e-05	0.00424842	0.00377961	HDAC3/HDAC5/HDAC6/HDAC7/HDAC9/SIRT3/SIRT6	7
GO:0034979	NAD-dependent protein deacetylase activity	7/1147	16/16309	5.43505e-05	0.00424842	0.00377961	HDAC3/HDAC5/HDAC6/HDAC7/HDAC9/SIRT3/SIRT6	7
GO:0019843	rRNA binding	14/1147	60/16309	5.44035e-05	0.00424842	0.00377961	CIRBP/EEF2/NOL12/PTRF/RPL5/RPL8/RPLP0/RPLP1/RPLP2/RPS11/RPS14/RPS4X/RPS5/RPS9	14
GO:0019838	growth factor binding	22/1147	126/16309	6.26669e-05	0.0044859	0.00399089	ACVR1/BMPR2/COL1A1/COL1A2/COL3A1/COL6A1/CRIM1/ERBB2/ERBB3/FGFR1/FGFR2/FIBP/IL1RN/INSR/ITGB4/LTBP2/NTRK3/PCSK6/RPS19/TGFBR1/TGFBR3/THBS1	22
GO:0031078	histone deacetylase activity (H3-K14 specific)	6/1147	12/16309	7.63021e-05	0.00468168	0.00416506	HDAC3/HDAC5/HDAC6/HDAC7/HDAC9/SIRT3	6
GO:0032041	NAD-dependent histone deacetylase activity (H3-K14 specific)	6/1147	12/16309	7.63021e-05	0.00468168	0.00416506	HDAC3/HDAC5/HDAC6/HDAC7/HDAC9/SIRT3	6
GO:0050839	cell adhesion molecule binding	54/1147	454/16309	0.000100214	0.00567601	0.00504967	ACTN2/ADAM9/ANXA2/BZW2/CADM4/CALR/CC2D1A/CCT8/CIB2/CNN2/COL3A1/CRKL/CTNNB1/EEF2/EIF2S3/EPB41L1/EPHA2/ERC1/FBN1/FLNA/FLNB/FMNL2/FN1/HCFC1/HDLBP/ICAM1/ITGB2/MARK2/MKL2/MYH9/NISCH/NRG1/NRXN3/PARVA/PDLIM1/PHLDB2/PI4KA/PKM/PTPRM/RANBP1/RANGAP1/RPL34/RPL7A/RUVBL1/SCRIB/SELL/SMAGP/SPTAN1/TENM4/THBS1/TMOD3/UBAP2/VWF/ZC3HAV1	54
GO:0003779	actin binding	48/1147	390/16309	0.000105723	0.00567601	0.00504967	ABLIM1/ABLIM3/ACTN2/ACTR3B/ANXA8/CNN2/CORO2A/CYFIP1/DIAPH1/EEF2/ENC1/EPB41L1/FHOD3/FLNA/FLNB/FMNL2/HDAC6/HIP1/HOMER2/INPPL1/KCNMA1/MICAL3/MSRB2/MYH3/MYH9/MYO10/MYO19/MYO1C/MYO1G/MYO5A/MYO9A/MYO9B/MYPN/OPHN1/PARVA/PHACTR1/PHACTR2/PTK2/RCSD1/SHROOM2/SHROOM3/SHROOM4/SNTG2/SPTAN1/SSH2/TMOD3/WDR1/WIPF1	48
GO:0003735	structural constituent of ribosome	30/1147	210/16309	0.000160976	0.008134	0.00723642	MRPS24/MRPS35/MRPS5/RPL13A/RPL18A/RPL34/RPL35A/RPL37A/RPL39/RPL5/RPL7A/RPL8/RPLP0/RPLP1/RPLP2/RPS11/RPS12/RPS14/RPS16/RPS19/RPS20/RPS21/RPS4X/RPS5/RPS6/RPS8/RPS9/SLC25A43/UBA52/UCP2	30
GO:0008641	small protein activating enzyme activity	5/1147	10/16309	0.000318732	0.0152106	0.0135321	ATG7/SAE1/UBA1/UBA2/UBA7	5
GO:0004714	transmembrane receptor protein tyrosine kinase activity	13/1147	64/16309	0.000434107	0.0186449	0.0165874	AXL/CRIM1/EFEMP1/EPHA2/EPHB2/EPHB4/ERBB2/FGFR1/FGFR2/INSR/NTRK3/PDGFRL/ROR2	13
GO:0005518	collagen binding	13/1147	64/16309	0.000434107	0.0186449	0.0165874	ADAM9/CD44/COCH/FN1/MMP9/MRC2/NID1/SMAD4/SMAD7/SPARC/SRGN/THBS1/VWF	13
GO:0098632	protein binding involved in cell-cell adhesion	37/1147	296/16309	0.000466027	0.0190627	0.0169592	ANXA2/BZW2/CC2D1A/CCT8/CNN2/CRKL/CTNNB1/EEF2/EIF2S3/EPB41L1/EPHA2/ERC1/FLNA/FLNB/FMNL2/HCFC1/HDLBP/MARK2/MKL2/MYH9/NFASC/PARVA/PDLIM1/PHLDB2/PI4KA/PKM/PLXNB3/RANBP1/RANGAP1/RPL34/RPL7A/RUVBL1/SCRIB/SPTAN1/TMOD3/UBAP2/ZC3HAV1	37
GO:0000146	microfilament motor activity	7/1147	22/16309	0.000557347	0.0212875	0.0189384	MYH3/MYH9/MYO10/MYO19/MYO1C/MYO5A/MYO9B	7
GO:0008134	transcription factor binding	55/1147	498/16309	0.000569979	0.0212875	0.0189384	ACTB/ANXA4/APBB2/ARHGEF2/ATG7/BBS1/BBS2/BRF1/CAND2/CHCHD2/CTNNB1/CXXC5/DRG1/FLNA/GSK3B/HDAC3/HDAC5/HDAC7/HDAC9/HIPK2/HTT/JMJD1C/KAT6A/MEF2C/MEF2D/MTOR/MYBBP1A/NCOA6/NFATC1/NLK/NOP58/NR4A3/NRIP1/PELP1/POLR1E/PRDM5/PRKDC/RARB/RBPJ/RPTOR/SMAD4/SPI1/SUFU/TBP/TCF12/TCF4/TCF7L2/TLE1/TLE4/TP53BP1/TRIP6/UBA2/USP7/WWP2/YEATS2	55
GO:0098631	protein binding involved in cell adhesion	37/1147	301/16309	0.000641611	0.0224053	0.0199329	ANXA2/BZW2/CC2D1A/CCT8/CNN2/CRKL/CTNNB1/EEF2/EIF2S3/EPB41L1/EPHA2/ERC1/FLNA/FLNB/FMNL2/HCFC1/HDLBP/MARK2/MKL2/MYH9/NFASC/PARVA/PDLIM1/PHLDB2/PI4KA/PKM/PLXNB3/RANBP1/RANGAP1/RPL34/RPL7A/RUVBL1/SCRIB/SPTAN1/TMOD3/UBAP2/ZC3HAV1	37
GO:0008536	Ran GTPase binding	8/1147	29/16309	0.000660854	0.0224053	0.0199329	KPNB1/RANBP1/RANBP17/RANGAP1/TNPO2/XPO1/XPO5/XPO6	8
GO:0045182	translation regulator activity	9/1147	36/16309	0.000678158	0.0224053	0.0199329	CELF1/CIRBP/EIF4EBP1/EIF4EBP2/IGF2BP3/PABPC1/RPS14/RPS9/SAMD4A	9
GO:0005516	calmodulin binding	26/1147	188/16309	0.000706453	0.0224757	0.0199955	ATP2B1/CACNA1C/CNN2/DDX5/EEF2K/FBXL2/KCNH1/MAPKAPK5/MYH3/MYH9/MYO10/MYO1C/MYO1G/MYO5A/MYO9B/PDE1C/PLCB1/PPP3CA/PPP3CC/RASGRF2/SLC8A3/SLC9A1/SPTAN1/TRPM4/TRPV1/UBR4	26
GO:0098641	cadherin binding involved in cell-cell adhesion	35/1147	286/16309	0.000959884	0.0281044	0.0250031	ANXA2/BZW2/CC2D1A/CCT8/CNN2/CRKL/CTNNB1/EEF2/EIF2S3/EPB41L1/EPHA2/ERC1/FLNA/FLNB/FMNL2/HCFC1/HDLBP/MARK2/MKL2/MYH9/PARVA/PDLIM1/PHLDB2/PI4KA/PKM/RANBP1/RANGAP1/RPL34/RPL7A/RUVBL1/SCRIB/SPTAN1/TMOD3/UBAP2/ZC3HAV1	35
GO:0019902	phosphatase binding	22/1147	152/16309	0.000960705	0.0281044	0.0250031	ANAPC7/ANKLE2/AP3B1/CARHSP1/CDC27/CDKN1B/CSRNP2/CTNNB1/EIF4EBP1/ERBB2/FBXL2/MAST2/MVP/NEK2/PHACTR1/SFI1/SLC9A1/SPRED1/STAT5B/TPRN/TRPC4AP/TSC2	22
GO:0005089	Rho guanyl-nucleotide exchange factor activity	14/1147	78/16309	0.000981526	0.0281044	0.0250031	ABR/ARHGEF10/ARHGEF10L/ARHGEF2/DNMBP/DOCK1/FARP2/FGD1/FGD6/PREX2/RASGRF2/SPATA13/TIAM2/TRIO	14
GO:0016887	ATPase activity	47/1147	423/16309	0.00122641	0.0333549	0.0296743	ABCC1/ABCC10/ABCC2/ABCC3/ABCD4/ATP10A/ATP13A1/ATP2A2/ATP2B1/ATP5G1/ATP5O/ATP6V0B/ATP8A1/ATP8A2/ATP9A/CCT8/DDX41/DDX42/DDX5/DDX55/DHX34/DHX57/DHX8/DYNC2H1/EIF4A1/ERCC2/KIF26B/KIF7/KIFC1/MCM7/MLH1/MLH3/MYH3/MYH9/MYO10/MYO19/MYO1C/MYO9B/PEX6/PIF1/RAD51/RFC4/RTEL1/RUVBL1/RUVBL2/STARD9/VWA8	47
GO:0004713	protein tyrosine kinase activity	24/1147	175/16309	0.00125093	0.0333549	0.0296743	AXL/BAZ1B/CRIM1/CSF2RB/EFEMP1/EPHA2/EPHB2/EPHB4/ERBB2/ERBB3/FGFR1/FGFR2/INSR/MELK/NRG1/NTRK3/PDGFRL/PKDCC/PTK2/PTK2B/ROR2/STAT5B/TRIM24/TYK2	24
GO:0045296	cadherin binding	36/1147	302/16309	0.00131365	0.0333549	0.0296743	ANXA2/BZW2/CC2D1A/CCT8/CNN2/CRKL/CTNNB1/EEF2/EIF2S3/EPB41L1/EPHA2/ERC1/FLNA/FLNB/FMNL2/HCFC1/HDLBP/MARK2/MKL2/MYH9/PARVA/PDLIM1/PHLDB2/PI4KA/PKM/PTPRM/RANBP1/RANGAP1/RPL34/RPL7A/RUVBL1/SCRIB/SPTAN1/TMOD3/UBAP2/ZC3HAV1	36
GO:0042623	ATPase activity, coupled	37/1147	313/16309	0.00132022	0.0333549	0.0296743	ABCC1/ABCC10/ABCC2/ABCC3/ABCD4/ATP10A/ATP13A1/ATP2A2/ATP2B1/ATP5G1/ATP5O/ATP6V0B/ATP8A1/ATP8A2/ATP9A/CCT8/DDX41/DDX42/DDX5/DDX55/DHX34/DHX57/DHX8/EIF4A1/ERCC2/MCM7/MYH3/MYH9/MYO10/MYO1C/PEX6/PIF1/RAD51/RFC4/RTEL1/RUVBL1/RUVBL2	37

## Sheet: MF_down
GO analysis MF_down
ID	Description	GeneRatio	BgRatio	pvalue	p.adjust	qvalue	geneID	Count
GO:0019787	ubiquitin-like protein transferase activity	70/973	432/16309	1.42093e-14	1.09412e-11	9.18372e-12	ANKIB1/AREL1/ARIH1/ATG3/BACH1/BARD1/BIRC2/BIRC6/BRAP/BRCA1/BTRC/CACUL1/CUL2/DTL/DZIP3/FANCL/FBXO25/FBXO7/FBXO9/G2E3/HECTD1/HECTD2/HECTD4/HERC1/HERC4/HUWE1/ITCH/KIAA1586/KLHL24/KLHL8/MDM2/MED1/MIB1/NSMCE2/PIAS1/PPIL2/RABGEF1/RAD18/RANBP2/RFWD2/RFWD3/RMND5A/RNF10/RNF13/RNF138/RNF149/RNF217/RNF24/RNF38/SHPRH/SKP1/TRIM24/TRIM25/TRIM33/TRIP12/UBE2D2/UBE2F/UBE2G1/UBE2H/UBE2I/UBE2K/UBE2L3/UBE2Q2/UBE3A/U…	70
GO:0004842	ubiquitin-protein transferase activity	63/973	414/16309	5.37743e-12	2.07031e-09	1.73776e-09	ANKIB1/AREL1/ARIH1/BACH1/BARD1/BIRC2/BIRC6/BRAP/BRCA1/BTRC/CACUL1/CUL2/DTL/DZIP3/FANCL/FBXO25/FBXO7/FBXO9/G2E3/HECTD1/HECTD2/HECTD4/HERC1/HERC4/HUWE1/ITCH/KLHL24/KLHL8/MDM2/MED1/MIB1/PPIL2/RABGEF1/RAD18/RFWD2/RFWD3/RMND5A/RNF10/RNF13/RNF138/RNF149/RNF217/RNF24/RNF38/SHPRH/SKP1/TRIM24/TRIM25/TRIM33/TRIP12/UBE2D2/UBE2F/UBE2G1/UBE2H/UBE2K/UBE2L3/UBE2Q2/UBE3A/UBE3C/UBR1/UBR2/UBR5/UHRF2	63
GO:0004674	protein serine/threonine kinase activity	65/973	445/16309	1.55808e-11	3.99908e-09	3.35671e-09	AKT2/AKT3/ATM/AURKA/BMP2K/BMPR2/BRAF/BUB1B/CCNB1/CCNT2/CDC42BPA/CDK17/CDK19/CDK8/CLK1/CSNK1G3/DYRK1A/EIF2AK1/GSK3B/HIPK3/LTBP1/MAP2K4/MAP3K1/MAP3K2/MAP3K5/MAP4K3/MAP4K5/MAPK1/MAPK8/MAPK9/MARK3/MASTL/MELK/NEK1/NEK4/NEK7/NEK9/NLK/NRBP1/PAK2/PHKB/PKN2/PRKACB/PRKCA/PRKCB/ROCK2/RPS6KC1/SLK/SMG1/SNRK/STK10/STK11/STK3/STK38/STK39/STK4/TAOK1/TAOK3/TLK1/TLK2/TRPM7/TTBK2/VRK1/VRK2/WNK1	65
GO:0061659	ubiquitin-like protein ligase activity	36/973	199/16309	1.97817e-09	3.80797e-07	3.1963e-07	ANKIB1/ARIH1/BRAP/BTRC/CACUL1/CUL2/DZIP3/FANCL/ITCH/KIAA1586/MDM2/MED1/PIAS1/PPIL2/RABGEF1/RAD18/RFWD2/RNF13/RNF138/RNF149/RNF217/RNF24/RNF38/SKP1/TRIM24/TRIM25/UBE2F/UBE2G1/UBE2H/UBE2K/UBE3A/UBR1/UBR2/UBR5/UHRF2/ZNF451	36
GO:0043130	ubiquitin binding	25/973	107/16309	2.74214e-09	4.2229e-07	3.54458e-07	BIRC2/BRAP/C6orf106/DZIP3/EPS15/FAF1/FBXO7/IDE/KIF18A/RAD18/RAD23B/RNF169/UBAC2/UBAP1/UBQLN1/UBR5/UBXN2A/UBXN7/UCHL3/UIMC1/USP25/VPS36/ZFAND6/ZRANB1/ZRANB3	25
GO:0003682	chromatin binding	61/973	474/16309	1.04638e-08	1.34285e-06	1.12715e-06	ACTN4/ASH1L/ASH2L/ATAD2/ATAD2B/ATF2/ATRX/CCNT2/CREBBP/DEK/DNMT1/EED/ELK4/EP300/ERCC6/EZH1/EZH2/FOXO3/HNRNPC/HNRNPD/HP1BP3/JARID2/KDM1A/KDM5A/MED1/NCOA1/NCOA2/NIPBL/NSD1/PBRM1/PHF21A/PHF8/POLA1/PRIMPOL/PRKCB/RBL1/RBL2/REL/RERE/RNF169/SAFB/SATB1/SIN3A/SLC30A9/SMAD2/SMAD4/SMARCA5/SMARCC1/SMARCD1/SMC1A/SUZ12/TADA2A/TDRD3/TOP1/TRIM24/URI1/USP3/VRK1/WHSC1/ZEB1/ZMYND8	61
GO:0004702	receptor signaling protein serine/threonine kinase activity	22/973	91/16309	1.24759e-08	1.37235e-06	1.15191e-06	BMPR2/BRAF/MAP2K4/MAP3K1/MAP3K2/MAP3K5/MAP4K3/MAP4K5/MAPK1/MAPK8/MAPK9/NEK1/NEK4/NLK/PAK2/SLK/STK10/STK3/STK39/STK4/TAOK1/TAOK3	22
GO:0032182	ubiquitin-like protein binding	26/973	126/16309	2.14362e-08	2.06324e-06	1.73182e-06	BIRC2/BRAP/C6orf106/DCUN1D4/DZIP3/EPS15/FAF1/FBXO7/IDE/KIF18A/RAD18/RAD23B/RNF169/UBAC2/UBAP1/UBQLN1/UBR5/UBXN2A/UBXN7/UCHL3/UIMC1/USP25/VPS36/ZFAND6/ZRANB1/ZRANB3	26
GO:0061630	ubiquitin protein ligase activity	33/973	194/16309	4.42067e-08	3.74591e-06	3.14421e-06	ANKIB1/ARIH1/BRAP/BTRC/CACUL1/CUL2/DZIP3/FANCL/ITCH/MDM2/MED1/PPIL2/RABGEF1/RAD18/RFWD2/RNF13/RNF138/RNF149/RNF217/RNF24/RNF38/SKP1/TRIM24/TRIM25/UBE2F/UBE2G1/UBE2H/UBE2K/UBE3A/UBR1/UBR2/UBR5/UHRF2	33
GO:0008276	protein methyltransferase activity	20/973	82/16309	4.86482e-08	3.74591e-06	3.14421e-06	ASH1L/ASH2L/CAMKMT/DOT1L/EED/EZH1/EZH2/KMT2C/KMT2E/LCMT1/NSD1/PCMT1/PCMTD1/PRDM2/SETD2/SETD3/SUV39H2/SUZ12/WHSC1/WHSC1L1	20
GO:0098641	cadherin binding involved in cell-cell adhesion	42/973	286/16309	5.56987e-08	3.8754e-06	3.2529e-06	ASAP1/CAPZA1/CAPZB/CDH1/CHMP5/CTNNA1/DDX6/DIAPH3/DLG1/EEF2/EPN2/EPS15/ESYT2/FLNA/GAPVD1/GIGYF2/KTN1/LARP1/PAK2/PCMT1/PDLIM5/PICALM/PKN2/PLEC/RARS/RDX/RSL1D1/SEPT2/SEPT9/SLK/SNX1/SNX5/STK38/TMOD3/TMPO/TRIM25/UBAP2/USO1/USP8/VAPA/VAPB/YWHAE	42
GO:0005487	nucleocytoplasmic transporter activity	12/973	30/16309	6.03959e-08	3.8754e-06	3.2529e-06	CSE1L/NUP107/NUP153/NUP35/NUP54/NUP98/NUPL2/POM121/POM121C/XPO1/XPO5/XPO7	12
GO:0098632	protein binding involved in cell-cell adhesion	42/973	296/16309	1.48255e-07	8.78125e-06	7.37073e-06	ASAP1/CAPZA1/CAPZB/CDH1/CHMP5/CTNNA1/DDX6/DIAPH3/DLG1/EEF2/EPN2/EPS15/ESYT2/FLNA/GAPVD1/GIGYF2/KTN1/LARP1/PAK2/PCMT1/PDLIM5/PICALM/PKN2/PLEC/RARS/RDX/RSL1D1/SEPT2/SEPT9/SLK/SNX1/SNX5/STK38/TMOD3/TMPO/TRIM25/UBAP2/USO1/USP8/VAPA/VAPB/YWHAE	42
GO:0018024	histone-lysine N-methyltransferase activity	14/973	45/16309	1.93008e-07	1.06154e-05	8.91028e-06	ASH1L/ASH2L/DOT1L/EZH1/EZH2/KMT2C/KMT2E/NSD1/PRDM2/SETD2/SETD3/SUV39H2/WHSC1/WHSC1L1	14
GO:0042054	histone methyltransferase activity	16/973	59/16309	2.19952e-07	1.12909e-05	9.47722e-06	ASH1L/ASH2L/DOT1L/EED/EZH1/EZH2/KMT2C/KMT2E/NSD1/PRDM2/SETD2/SETD3/SUV39H2/SUZ12/WHSC1/WHSC1L1	16
GO:0098631	protein binding involved in cell adhesion	42/973	301/16309	2.36823e-07	1.13971e-05	9.56639e-06	ASAP1/CAPZA1/CAPZB/CDH1/CHMP5/CTNNA1/DDX6/DIAPH3/DLG1/EEF2/EPN2/EPS15/ESYT2/FLNA/GAPVD1/GIGYF2/KTN1/LARP1/PAK2/PCMT1/PDLIM5/PICALM/PKN2/PLEC/RARS/RDX/RSL1D1/SEPT2/SEPT9/SLK/SNX1/SNX5/STK38/TMOD3/TMPO/TRIM25/UBAP2/USO1/USP8/VAPA/VAPB/YWHAE	42
GO:0045296	cadherin binding	42/973	302/16309	2.59658e-07	1.1761e-05	9.87182e-06	ASAP1/CAPZA1/CAPZB/CDH1/CHMP5/CTNNA1/DDX6/DIAPH3/DLG1/EEF2/EPN2/EPS15/ESYT2/FLNA/GAPVD1/GIGYF2/KTN1/LARP1/PAK2/PCMT1/PDLIM5/PICALM/PKN2/PLEC/RARS/RDX/RSL1D1/SEPT2/SEPT9/SLK/SNX1/SNX5/STK38/TMOD3/TMPO/TRIM25/UBAP2/USO1/USP8/VAPA/VAPB/YWHAE	42
GO:0016279	protein-lysine N-methyltransferase activity	15/973	56/16309	6.25665e-07	2.67646e-05	2.24654e-05	ASH1L/ASH2L/CAMKMT/DOT1L/EZH1/EZH2/KMT2C/KMT2E/NSD1/PRDM2/SETD2/SETD3/SUV39H2/WHSC1/WHSC1L1	15
GO:0016278	lysine N-methyltransferase activity	15/973	57/16309	8.02704e-07	3.25306e-05	2.73053e-05	ASH1L/ASH2L/CAMKMT/DOT1L/EZH1/EZH2/KMT2C/KMT2E/NSD1/PRDM2/SETD2/SETD3/SUV39H2/WHSC1/WHSC1L1	15
GO:0051020	GTPase binding	39/973	300/16309	3.75997e-06	0.000140168	0.000117653	ACAP2/AP1G1/CORO1C/CSE1L/DAAM1/DENND1A/DENND1B/DIAPH3/DOCK11/ECT2/EPRS/EVI5/EXOC2/FGD4/FLNA/GDI2/GNB1/KIF16B/KIF3B/MAPKAP1/NUP50/RABGAP1L/RABGEF1/RAC1/RALBP1/RANBP2/RANBP9/RHOBTB3/ROCK2/STXBP5/TBC1D12/TBC1D14/TBCK/TNPO1/USP33/USP6NL/XPO1/XPO5/XPO7	39
GO:0031267	small GTPase binding	37/973	278/16309	3.82277e-06	0.000140168	0.000117653	ACAP2/AP1G1/CORO1C/CSE1L/DAAM1/DENND1A/DENND1B/DIAPH3/DOCK11/ECT2/EVI5/EXOC2/FGD4/FLNA/GDI2/KIF16B/KIF3B/MAPKAP1/NUP50/RABGAP1L/RABGEF1/RAC1/RALBP1/RANBP2/RANBP9/RHOBTB3/ROCK2/STXBP5/TBC1D12/TBC1D14/TBCK/TNPO1/USP33/USP6NL/XPO1/XPO5/XPO7	37
GO:0003713	transcription coactivator activity	38/973	290/16309	4.13147e-06	0.000144602	0.000121374	ACTN4/ASXL1/ATF2/ATF6/BIRC2/BRCA1/CCAR1/CREBBP/DCAF6/DDX17/EP300/KDM1A/KDM5A/KMT2E/MED1/MED12L/MED13/MTDH/NCOA1/NCOA2/NPAT/NRIP1/PIAS1/PRKCB/RERE/SETD3/SLC30A9/SMARCC1/SMARCD1/SP100/SS18/TADA2A/TDRD3/TFDP1/TRIM24/UBE2L3/UBE3A/ZEB1	38
GO:0005057	receptor signaling protein activity	24/973	144/16309	4.32449e-06	0.000144776	0.000121521	BMPR2/BRAF/MAP2K4/MAP3K1/MAP3K2/MAP3K5/MAP4K3/MAP4K5/MAPK1/MAPK8/MAPK9/NEK1/NEK4/NLK/PAK2/SLK/SMAD2/SMAD4/STK10/STK3/STK39/STK4/TAOK1/TAOK3	24
GO:0017016	Ras GTPase binding	35/973	260/16309	5.37579e-06	0.000172473	0.000144769	ACAP2/AP1G1/CORO1C/CSE1L/DAAM1/DENND1A/DENND1B/DIAPH3/DOCK11/ECT2/EVI5/EXOC2/FLNA/KIF16B/KIF3B/MAPKAP1/NUP50/RABGAP1L/RABGEF1/RAC1/RALBP1/RANBP2/RANBP9/RHOBTB3/ROCK2/STXBP5/TBC1D12/TBC1D14/TBCK/TNPO1/USP33/USP6NL/XPO1/XPO5/XPO7	35
GO:0019789	SUMO transferase activity	7/973	15/16309	1.10939e-05	0.0003406	0.000285889	KIAA1586/MDM2/NSMCE2/PIAS1/RANBP2/UBE2I/ZNF451	7
GO:0050681	androgen receptor binding	11/973	39/16309	1.15008e-05	0.0003406	0.000285889	BRCA1/EP300/FOXP1/KDM1A/KDM4C/NCOA1/NRIP1/NSD1/PIAS1/PRKCB/WIPI1	11
GO:0042393	histone binding	27/973	184/16309	1.3087e-05	0.000373221	0.000313271	ANP32B/ATAD2/ATAD2B/ATRX/CDYL/CHD2/DEK/HAT1/HIST1H4E/KDM7A/PHF21A/PHF8/PHIP/PRKCB/PSME4/RSF1/SMARCA5/SUZ12/TDRD3/TRIM24/UHRF2/UIMC1/USP15/USP3/USP49/VRK1/ZMYND8	27
GO:0016874	ligase activity	43/973	371/16309	2.28332e-05	0.000627912	0.000527051	ADSS/ARIH1/ATG3/BARD1/BIRC2/BIRC6/BRAP/BRCA1/BTRC/DZIP3/EPRS/FANCL/GMPS/KIAA1586/MDM2/MIB1/MYCBP2/NSMCE2/PIAS1/PPIL2/RAD18/RANBP2/RARS/RFWD2/RFWD3/RNF13/RNF138/RNF149/RNF169/RNF217/RNF38/SHPRH/SUCLG2/TRIM24/TRIM25/TRIM33/UBA2/UBE2F/UBE2I/UBR1/UBR2/UHRF2/ZNF451	43
GO:0050839	cell adhesion molecule binding	49/973	454/16309	4.16072e-05	0.00110474	0.00092729	ACTN4/ADAM17/ADAM22/ASAP1/CAPZA1/CAPZB/CD226/CDH1/CHMP5/CTNNA1/DDX6/DIAPH3/DLG1/EEF2/EPN2/EPS15/ESYT2/FLNA/GAPVD1/GIGYF2/ITGA4/ITGAL/KTN1/LARP1/PAK2/PCMT1/PDLIM5/PICALM/PKN2/PLEC/PTPN11/RARS/RDX/RSL1D1/SEPT2/SEPT9/SLK/SNX1/SNX5/STK38/TMOD3/TMPO/TRIM25/UBAP2/USO1/USP8/VAPA/VAPB/YWHAE	49
GO:0004843	thiol-dependent ubiquitin-specific protease activity	15/973	79/16309	5.71858e-05	0.00146777	0.001232	TANK/UCHL3/USP1/USP14/USP15/USP25/USP3/USP32/USP33/USP4/USP45/USP48/USP49/USP8/ZRANB1	15
GO:0016887	ATPase activity	46/973	423/16309	5.9126e-05	0.00146861	0.00123271	ABCB10/ABCC4/AK6/ATAD2/ATAD2B/ATP11B/ATP2C1/ATP5C1/ATP6V0A1/ATP7A/ATP8A1/ATP9B/ATRX/BPTF/BRIP1/CHD2/CHD6/CLPX/CRBN/DDX17/DDX21/DDX6/DHX33/DMC1/DNA2/EIF4A2/ERCC6/ERCC6L2/IDE/INO80/KIF14/KIF15/KIF16B/KIF18A/KIF3B/PMS1/PMS2/RAD18/RALBP1/RFC1/RFC2/RHOBTB3/SMARCA5/VWA8/YME1L1/YTHDC2	46
GO:0035257	nuclear hormone receptor binding	20/973	127/16309	6.14606e-05	0.0014789	0.00124134	ACTN4/ASXL1/BRCA1/CNOT1/DDX17/EP300/FOXP1/HIF1A/KDM1A/KDM4C/MED1/MED13/NCOA1/NCOA2/NRIP1/NSD1/PIAS1/PRKCB/TRIP12/WIPI1	20
GO:0031593	polyubiquitin binding	10/973	41/16309	0.000112073	0.00255562	0.00214511	DZIP3/EPS15/RAD18/RAD23B/RNF169/UBQLN1/UIMC1/ZFAND6/ZRANB1/ZRANB3	10
GO:0008757	S-adenosylmethionine-dependent methyltransferase activity	21/973	143/16309	0.000114749	0.00255562	0.00214511	ASH1L/ASH2L/CAMKMT/DNMT1/DOT1L/EZH1/EZH2/KMT2C/KMT2E/LCMT1/METTL3/NSD1/NSUN2/PCMT1/PCMTD1/PRDM2/SETD2/SETD3/SUV39H2/WHSC1/WHSC1L1	21
GO:0004721	phosphoprotein phosphatase activity	24/973	175/16309	0.000116164	0.00255562	0.00214511	CDC14A/CDC25C/CTDP1/DLG1/DLGAP5/DNAJC6/EYA3/ILKAP/MTMR1/MTMR3/PHLPP2/PPA2/PPM1B/PPP2R3B/PPP4R1/PTEN/PTP4A2/PTPN11/PTPN12/PTPN22/PTPN4/PTPRA/RPAP2/SSH2	24
GO:0035258	steroid hormone receptor binding	14/973	77/16309	0.000162808	0.00348228	0.00292293	BRCA1/CNOT1/DDX17/EP300/FOXP1/KDM1A/KDM4C/MED1/NCOA1/NRIP1/NSD1/PIAS1/PRKCB/WIPI1	14
GO:0030374	ligand-dependent nuclear receptor transcription coactivator activity	11/973	51/16309	0.000169191	0.003521	0.00295542	ACTN4/CCAR1/DCAF6/KDM1A/MED1/MED13/NCOA1/NCOA2/PRKCB/SLC30A9/SS18	11
GO:0008170	N-methyltransferase activity	15/973	87/16309	0.000178666	0.00360744	0.00302798	ASH1L/ASH2L/CAMKMT/DOT1L/EZH1/EZH2/KMT2C/KMT2E/NSD1/PRDM2/SETD2/SETD3/SUV39H2/WHSC1/WHSC1L1	15
GO:0008047	enzyme activator activity	49/973	482/16309	0.000182715	0.00360744	0.00302798	ACAP2/AGAP5/AGAP6/AGFG1/AHSA2/ARAP1/ARHGAP12/ARHGAP26/ARHGEF12/ASAP1/ATP7A/AZIN1/BNIP2/CFLAR/CLPX/DEPDC1/DEPDC5/DNAJB6/ECT2/ERCC6/EVI5/GAPVD1/GDI2/GNAQ/MOB1B/PAK2/PHACTR4/PSAP/PSME3/PSME4/RABGAP1L/RALBP1/RAPGEF2/RASA2/RFC1/RICTOR/STK11/STK3/STK4/STXBP5/TANK/TBC1D12/TBC1D14/TBCD/TBCK/TGFB1/UBA2/USP6NL/WNK1	49
GO:0051427	hormone receptor binding	21/973	148/16309	0.000187999	0.00361898	0.00303767	ACTN4/ASXL1/BRCA1/CNOT1/DDX17/EP300/FOXP1/HIF1A/KDM1A/KDM4C/MED1/MED13/NCOA1/NCOA2/NRIP1/NSD1/PIAS1/PRKCB/PTPN11/TRIP12/WIPI1	21
GO:0008536	Ran GTPase binding	8/973	29/16309	0.000217181	0.00398164	0.00334208	CSE1L/NUP50/RANBP2/RANBP9/TNPO1/XPO1/XPO5/XPO7	8
GO:0016896	exoribonuclease activity, producing 5'-phosphomonoesters	8/973	29/16309	0.000217181	0.00398164	0.00334208	CNOT1/CNOT6/CNOT6L/DCP2/EXOSC10/PAN3/PARN/XRN2	8
GO:0031625	ubiquitin protein ligase binding	32/973	275/16309	0.000228596	0.00409347	0.00343594	ARIH1/ATF6/AURKA/BRCA1/CACUL1/CCT2/CUL2/DERL1/FAF1/FANCL/FBXO7/GSK3B/HIF1A/MDM2/NLK/PIAS1/PRKACB/PRR5L/PTPN22/RAD18/SHPRH/SMAD2/TANK/TCP1/UBE2F/UBE2G1/UBE2H/UBE2K/UBE2L3/UBXN7/USP25/YWHAE	32
GO:0003725	double-stranded RNA binding	12/973	62/16309	0.000256835	0.00449462	0.00377265	AGO2/DDX21/DROSHA/DUS2/FXR1/LSM14A/MBNL1/MTDH/STAU1/STAU2/STRBP/TFRC	12
GO:0044389	ubiquitin-like protein ligase binding	32/973	281/16309	0.000337331	0.0057721	0.00484494	ARIH1/ATF6/AURKA/BRCA1/CACUL1/CCT2/CUL2/DERL1/FAF1/FANCL/FBXO7/GSK3B/HIF1A/MDM2/NLK/PIAS1/PRKACB/PRR5L/PTPN22/RAD18/SHPRH/SMAD2/TANK/TCP1/UBE2F/UBE2G1/UBE2H/UBE2K/UBE2L3/UBXN7/USP25/YWHAE	32
GO:0004532	exoribonuclease activity	8/973	31/16309	0.000358868	0.00600714	0.00504222	CNOT1/CNOT6/CNOT6L/DCP2/EXOSC10/PAN3/PARN/XRN2	8
GO:0042974	retinoic acid receptor binding	7/973	24/16309	0.000371408	0.00608477	0.00510738	ACTN4/ASXL1/CNOT1/MED1/NCOA1/NRIP1/NSD1	7
GO:0004535	poly(A)-specific ribonuclease activity	5/973	12/16309	0.000416277	0.00667777	0.00560513	CNOT1/CNOT6/CNOT6L/PAN3/PARN	5
GO:0002039	p53 binding	12/973	66/16309	0.000469907	0.00713116	0.00598569	BANP/CREBBP/EEF2/EP300/GSK3B/KDM1A/MDM2/PSME3/RFWD3/STK11/TP53BP2/TRIM24	12
GO:0070063	RNA polymerase binding	9/973	40/16309	0.000470851	0.00713116	0.00598569	AGO2/ANP32B/CCNT2/CDC73/ELP3/PABPN1/PKN2/SCAF8/YTHDC2	9
GO:0004402	histone acetyltransferase activity	11/973	57/16309	0.000472324	0.00713116	0.00598569	ATF2/CDYL/CREBBP/ELP3/EP300/HAT1/KANSL1/NCOA1/NCOA2/PHF20/TADA2A	11
GO:0008565	protein transporter activity	15/973	96/16309	0.000538139	0.0079686	0.00668861	AP1G1/COG2/COG3/CSE1L/EIF4ENIF1/NUPL2/RUFY1/TFRC/TIMM23B/TNPO1/TNPO3/USO1/XPO1/XPO5/XPO7	15
GO:0061733	peptide-lysine-N-acetyltransferase activity	11/973	58/16309	0.000551944	0.00801881	0.00673076	ATF2/CDYL/CREBBP/ELP3/EP300/HAT1/KANSL1/NCOA1/NCOA2/PHF20/TADA2A	11
GO:0032452	histone demethylase activity	7/973	26/16309	0.000635667	0.00906414	0.00760817	KDM1A/KDM1B/KDM4B/KDM4C/KDM5A/KDM7A/PHF8	7
GO:0047485	protein N-terminus binding	15/973	98/16309	0.000672609	0.00941653	0.00790396	ACOX1/ACTN4/ATM/BIRC2/ERCC6/EXOC2/NCOA1/NIPBL/NPAT/PDCD10/PDLIM5/SCFD1/SMARCC1/TGFB1/ZMYND8	15
GO:0003729	mRNA binding	21/973	165/16309	0.000829342	0.0114034	0.00957173	AGO2/CELF1/CPEB1/CPEB4/CPSF6/CSTF3/EIF4ENIF1/FXR1/HNRNPC/HNRNPD/LARP1/LUC7L3/METTL3/PAIP2/PARN/QKI/SLBP/SRSF4/TRA2B/TSN/XPO5	21
GO:0036459	thiol-dependent ubiquitinyl hydrolase activity	16/973	112/16309	0.000977412	0.012976	0.0108917	FAM188A/TANK/UCHL3/USP1/USP14/USP15/USP25/USP3/USP32/USP33/USP4/USP45/USP48/USP49/USP8/ZRANB1	16
GO:0101005	ubiquitinyl hydrolase activity	16/973	112/16309	0.000977412	0.012976	0.0108917	FAM188A/TANK/UCHL3/USP1/USP14/USP15/USP25/USP3/USP32/USP33/USP4/USP45/USP48/USP49/USP8/ZRANB1	16
GO:0019783	ubiquitin-like protein-specific protease activity	17/973	123/16309	0.00100597	0.0130091	0.0109194	FAM188A/SENP6/TANK/UCHL3/USP1/USP14/USP15/USP25/USP3/USP32/USP33/USP4/USP45/USP48/USP49/USP8/ZRANB1	17
GO:0000175	3'-5'-exoribonuclease activity	7/973	28/16309	0.00103059	0.0130091	0.0109194	CNOT1/CNOT6/CNOT6L/EXOSC10/PAN3/PARN/XRN2	7
GO:0008139	nuclear localization sequence binding	7/973	28/16309	0.00103059	0.0130091	0.0109194	BRAP/NUP153/NUP98/POM121/POM121C/TNPO1/TNPO3	7
GO:0017056	structural constituent of nuclear pore	6/973	21/16309	0.00110948	0.013779	0.0115657	NUP107/NUP153/NUP54/NUP98/POM121/POM121C	6
GO:0035091	phosphatidylinositol binding	24/973	205/16309	0.00121554	0.0148565	0.0124702	ARAP1/ASAP1/DENND1A/EEA1/EPB41/ESYT2/FAM21C/FCHO2/KIF16B/KRIT1/MAPKAP1/MITD1/PICALM/PIGK/PIK3C2B/PLEKHA2/RPS6KC1/SNX1/SNX13/SNX5/SNX6/VPS36/WIPI1/ZCCHC2	24
GO:0005048	signal sequence binding	9/973	46/16309	0.00137567	0.016551	0.0138924	AP2M1/BRAP/NUP153/NUP98/POM121/POM121C/SRP54/TNPO1/TNPO3	9
GO:0008168	methyltransferase activity	24/973	209/16309	0.00158518	0.0187783	0.0157619	ASH1L/ASH2L/CAMKMT/DNMT1/DOT1L/EED/EZH1/EZH2/KMT2C/KMT2E/LCMT1/METTL3/METTL8/NSD1/NSUN2/PCMT1/PCMTD1/PRDM2/SETD2/SETD3/SUV39H2/SUZ12/WHSC1/WHSC1L1	24
GO:0034212	peptide N-acetyltransferase activity	11/973	66/16309	0.00168524	0.0196611	0.016503	ATF2/CDYL/CREBBP/ELP3/EP300/HAT1/KANSL1/NCOA1/NCOA2/PHF20/TADA2A	11
GO:0032454	histone demethylase activity (H3-K9 specific)	4/973	10/16309	0.00197779	0.022071	0.0185257	KDM1A/KDM4C/KDM7A/PHF8	4
GO:0042975	peroxisome proliferator activated receptor binding	4/973	10/16309	0.00197779	0.022071	0.0185257	ASXL1/ASXL2/MDM2/MED1	4
GO:0051010	microtubule plus-end binding	4/973	10/16309	0.00197779	0.022071	0.0185257	APC/CLASP1/CLASP2/KIF18A	4
GO:0042623	ATPase activity, coupled	32/973	313/16309	0.00207883	0.0228672	0.019194	ABCB10/ABCC4/ATP11B/ATP2C1/ATP5C1/ATP6V0A1/ATP7A/ATP8A1/ATP9B/ATRX/BPTF/BRIP1/CHD2/CHD6/CLPX/CRBN/DDX17/DDX21/DDX6/DHX33/DMC1/DNA2/EIF4A2/ERCC6/ERCC6L2/KIF18A/RAD18/RALBP1/RFC1/RFC2/YME1L1/YTHDC2	32
GO:0008134	transcription factor binding	46/973	498/16309	0.00213567	0.0231615	0.0194411	ACTN4/ASXL1/ATF2/BPTF/CCNT2/CHD6/CNOT1/CREBBP/DHX33/EP300/ETS1/FAF1/FLNA/FOXO3/GSK3B/HIF1A/HNRNPD/KDM1A/MAPK1/MAPK9/MED1/MED13/MTDH/NCOA1/NCOA2/NFE2L2/NLK/NRIP1/NSD1/PIAS1/RBL1/SETD3/SIN3A/SMAD2/SMAD4/STK4/TAF12/TFDP1/TFDP2/TP53BP2/TRIP12/UBA2/UBE2I/UBXN7/ZEB1/ZMYND8	46
GO:0008017	microtubule binding	24/973	214/16309	0.00217925	0.0231856	0.0194614	APC/CDK5RAP2/CEP350/CEP57/CEP57L1/CLASP1/CLASP2/FNTA/GAS2L3/HDGFRP3/KIF14/KIF15/KIF16B/KIF18A/KIF3B/KRIT1/NDE1/NUSAP1/PRC1/TUBGCP3/TUBGCP4/VAPA/VAPB/ZNF207	24
GO:0016779	nucleotidyltransferase activity	17/973	132/16309	0.00219812	0.0231856	0.0194614	CRCP/ISPD/PAPD4/PAPOLA/PAPOLG/POLA1/POLE2/POLR3C/PRIM1/PRIMPOL/PTGES3/REV1/TERF2/TRNT1/UGP2/USP14/ZCCHC6	17
GO:0004725	protein tyrosine phosphatase activity	14/973	100/16309	0.00240124	0.0249859	0.0209724	CDC14A/CDC25C/DNAJC6/EYA3/MTMR1/MTMR3/PTEN/PTP4A2/PTPN11/PTPN12/PTPN22/PTPN4/PTPRA/SSH2	14
GO:0003684	damaged DNA binding	10/973	60/16309	0.00269817	0.0277012	0.0232516	BRCA1/CREBBP/DDB1/EP300/MSH3/NEIL3/RAD18/RAD23B/REV1/RPA1	10
GO:0001106	RNA polymerase II transcription corepressor activity	6/973	25/16309	0.0029509	0.0296204	0.0248625	N4BP2L2/RERE/SIN3A/URI1/ZMYND8/ZNF451	6
GO:0019992	diacylglycerol binding	4/973	11/16309	0.00296204	0.0296204	0.0248625	CHPT1/DGKD/RAPGEF2/RASGRP1	4
GO:0001076	transcription factor activity, RNA polymerase II transcription factor binding	17/973	137/16309	0.00326315	0.032111	0.026953	ATF2/CREBBP/HIF1A/MED1/MED12L/MED13/MED13L/MYBL1/MYBL2/N4BP2L2/NCOA1/RERE/SIN3A/SMAD4/URI1/ZMYND8/ZNF451	17
GO:0016741	transferase activity, transferring one-carbon groups	24/973	221/16309	0.00332194	0.032111	0.026953	ASH1L/ASH2L/CAMKMT/DNMT1/DOT1L/EED/EZH1/EZH2/KMT2C/KMT2E/LCMT1/METTL3/METTL8/NSD1/NSUN2/PCMT1/PCMTD1/PRDM2/SETD2/SETD3/SUV39H2/SUZ12/WHSC1/WHSC1L1	24
GO:0042800	histone methyltransferase activity (H3-K4 specific)	5/973	18/16309	0.0033362	0.032111	0.026953	ASH1L/ASH2L/KMT2C/KMT2E/SETD3	5
GO:0032451	demethylase activity	7/973	35/16309	0.00406612	0.0382829	0.0321336	KDM1A/KDM1B/KDM4B/KDM4C/KDM5A/KDM7A/PHF8	7
GO:0015631	tubulin binding	29/973	288/16309	0.00407688	0.0382829	0.0321336	AGTPBP1/APC/ARL8B/BRCA1/CDK5RAP2/CEP350/CEP57/CEP57L1/CLASP1/CLASP2/FNTA/GAS2L3/HDGFRP3/INO80/KIF14/KIF15/KIF16B/KIF18A/KIF3B/KRIT1/NDE1/NUSAP1/PRC1/TBCD/TUBGCP3/TUBGCP4/VAPA/VAPB/ZNF207	29
GO:0035173	histone kinase activity	5/973	19/16309	0.00430815	0.0399672	0.0335473	AURKA/CCNB1/PRKCA/PRKCB/VRK1	5
GO:0016796	exonuclease activity, active with either ribo- or deoxyribonucleic acids and producing 5'-phosphomonoesters	8/973	45/16309	0.0046793	0.0428936	0.0360037	CNOT1/CNOT6/CNOT6L/DCP2/EXOSC10/PAN3/PARN/XRN2	8
GO:0030331	estrogen receptor binding	7/973	36/16309	0.00479274	0.0434166	0.0364426	CNOT1/DDX17/MED1/NCOA1/NRIP1/NSD1/WIPI1	7
GO:0008080	N-acetyltransferase activity	12/973	86/16309	0.00489979	0.0438702	0.0368234	ATF2/CDYL/CREBBP/ELP3/EP300/ESCO1/HAT1/KANSL1/NCOA1/NCOA2/PHF20/TADA2A	12
GO:0001047	core promoter binding	18/973	155/16309	0.00512529	0.0453618	0.0380754	AGO2/CCAR1/CHD2/ELK4/EP300/EZH2/FOXO3/KANSL1/MED1/NRIP1/NSD1/PSPC1/RREB1/SAFB/SUZ12/TOP1/USP3/ZNF277	18
GO:0008094	DNA-dependent ATPase activity	11/973	76/16309	0.00523194	0.0457795	0.038426	ATRX/BPTF/BRIP1/CHD2/CHD6/DMC1/DNA2/ERCC6/RAD18/RFC1/RFC2	11
GO:0061650	ubiquitin-like protein conjugating enzyme activity	6/973	28/16309	0.0053881	0.0466162	0.0391283	BIRC6/UBE2D2/UBE2G1/UBE2H/UBE2I/UBE2L3	6
GO:0016922	ligand-dependent nuclear receptor binding	5/973	20/16309	0.00546613	0.0467658	0.0392538	MED1/NCOA1/NCOA2/SLC30A9/TRIM24	5
GO:0017160	Ral GTPase binding	4/973	13/16309	0.00583118	0.0493408	0.0414152	EXOC2/FLNA/RALBP1/USP33	4
